# Supplementary material
Source: PubMed Central journal article supplement (PMC2663394)
Supplement: NIHMS93024-supplement-1_si_001.pdf [file NIHMS93024-supplement-1_si_001.pdf]

# ORIGIN OF ENANTIOSELECTIVITY IN CF<sub>3</sub>-PIP-CATALYZED KINETIC RESOLUTION OF SECONDARY BENZYLIC ALCOHOLS

Ximin Li,<sup>1</sup> Peng Liu,<sup>2</sup> K. N. Houk\*<sup>2</sup> and Vladimir B. Birman\*<sup>1</sup>

*A contribution from: (1) Department of Chemistry, Washington University, One Brookings Drive, St. Louis, Missouri 63130 and (2) Department of Chemistry and Biochemistry, University of California, Los Angeles, California 90095-1569*

## SUPPORTING INFORMATION

|      |                                                                                                                                                                                                                                                                |      |
|------|----------------------------------------------------------------------------------------------------------------------------------------------------------------------------------------------------------------------------------------------------------------|------|
| I.   | General.....                                                                                                                                                                                                                                                   | S-1  |
| II.  | Kinetic resolution of 1-phenylethanol catalyzed by (R)-CF <sub>3</sub> -PIP <b>1</b> .....                                                                                                                                                                     | S-1  |
| III. | Preparation and X-ray structure of N-Acetyl-(R)-CF <sub>3</sub> -PIP <sup>+</sup> SbF <sub>6</sub> <sup>-</sup> <b>5a</b> .....                                                                                                                                | S-2  |
| IV.  | Details of the computational study.....                                                                                                                                                                                                                        | S-3  |
|      | (a) Geometry of N-Acetyl-(R)-CF <sub>3</sub> -PIP <sup>+</sup> ( <b>5</b> ).....                                                                                                                                                                               | S-3  |
|      | (b) Conformational search on the transition state of a model system, N-Acetyl-DHIP <sup>+</sup> AcO <sup>-</sup> , with (R)- and (S)-1-phenylethanol, at HF/3-21G level of theory.....                                                                         | S-4  |
|      | (c) Transition state geometries of N-Acetyl-(R)-CF <sub>3</sub> -PIP <sup>+</sup> AcO <sup>-</sup> and N-Propionyl-(R)-CF <sub>3</sub> -PIP <sup>+</sup> EtCO <sub>2</sub> <sup>-</sup> with (R)- and (S)-1-phenylethanol at B3LYP/6-31G* level of theory..... | S-11 |
|      | (d) Single-point calculations using other computational methods and solvation correction.....                                                                                                                                                                  | S-17 |
|      | (e) Interaction energies of benzene and N-acetyl-6-CF <sub>3</sub> -DHIP <sup>+</sup> .....                                                                                                                                                                    | S-18 |
|      | (f) Electrostatic potential of <b>7a</b> .....                                                                                                                                                                                                                 | S-19 |

### I. General.

All reagents were obtained from Sigma-Aldrich and were used as received unless specified otherwise. Chloroform-d was distilled from anhydrous K<sub>2</sub>CO<sub>3</sub>. N,N-Diisopropylethylamine and dichloromethane were distilled from CaH<sub>2</sub>. Preparation of (R)-CF<sub>3</sub>-PIP and other experimental details have been previously described.<sup>4a</sup>

### II. Kinetic resolution of 1-phenylethanol catalyzed by (R)-CF<sub>3</sub>-PIP **1**

Both experiments described below were performed in duplicate. A one-dram vial was charged with 0.25 mmol of racemic 1-phenylethanol, 100 mg of Na<sub>2</sub>SO<sub>4</sub>, 1.00 mL of the stock solution of the catalyst (0.010 M of **1** and 0.188 M of *i*-Pr<sub>2</sub>NEt in CDCl<sub>3</sub>) and a stir bar, closed with a rubber septum and stirred at room temperature for 15 minutes. Acetic or propionic anhydride (0.188 mmol) was added via syringe through the septum. The

reaction were monitored by periodically withdrawing aliquots and checking them by  $^1\text{H}$  NMR. The reactions were stopped by quenching with methanol after reaching ca.50% conversion by NMR. The workup and HPLC analysis followed the previously described standard procedure.<sup>4a</sup>

**Table S-1. Enantioselectivity data**

| Entry | Anhydride             | t(h) | # | ee <sub>PR</sub><br>% | ee <sub>SM</sub><br>% | C <sub>HPLC</sub><br>% | s    | C <sub>AVG</sub><br>% | S <sub>AVG</sub> |
|-------|-----------------------|------|---|-----------------------|-----------------------|------------------------|------|-----------------------|------------------|
| 1     | (MeCO) <sub>2</sub> O | 4.0  | 1 | 71.8                  | 66.1                  | 47.9                   | 12.0 | 48                    | 12               |
|       |                       |      | 2 | 72.9                  | 67.6                  | 48.1                   | 12.8 |                       |                  |
| 2     | (EtCO) <sub>2</sub> O | 2.3  | 1 | 85.8                  | 66.8                  | 43.8                   | 26.1 | 44                    | 26               |
|       |                       |      | 2 | 86.0                  | 66.4                  | 43.5                   | 26.5 |                       |                  |

### III. (a) Preparation of N-acetyl-(R)-CF<sub>3</sub>PIP hexafluoroantimonate **5a**

Acetyl chloride (10  $\mu\text{L}$ , 0.14 mmol) was added via syringe to a bright-yellow solution of (R)-CF<sub>3</sub>-PIP **1** (28.2 mg, 0.107 mmol) in CH<sub>2</sub>Cl<sub>2</sub> (1 mL). The solution immediately became colorless. After 5 minutes, the solvent and the excess acetyl chloride were rotary evaporated. A solution of AgSbF<sub>6</sub> (37 mg) in CH<sub>3</sub>CN (~ 0.5 mL) was then added to the residue, resulting in the formation of a grainy white precipitate. After 35 minutes, the precipitated AgCl was filtered off. The filtrate was left at room temperature for several days to allow slow crystallization. One of the colorless crystals of **5a** thus obtained was used in the X-ray crystallography analysis producing the structure presented below. Additional details may be found in the accompanying .cif file.

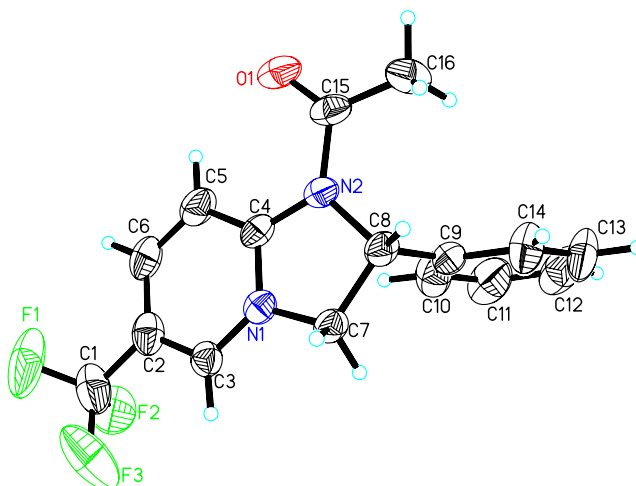

**Figure S-1.** Projection view of **5a** with 50% thermal ellipsoids. Anion not shown

#### IV. Details of the computational study.

All geometry optimizations and frequency calculations were performed in Gaussian 03.<sup>1</sup> Figures for the transition state structures are prepared with CYLview.<sup>2</sup> The Cartesian coordinates (Å), total SCF energies, enthalpies at 298K, and Gibbs free energies at 298K for the optimized structures are given below.

##### (a) Geometry of N-acetyl-(R)-CF<sub>3</sub>-PIP<sup>+</sup> (5) optimized at the B3LYP/6-31G\* level

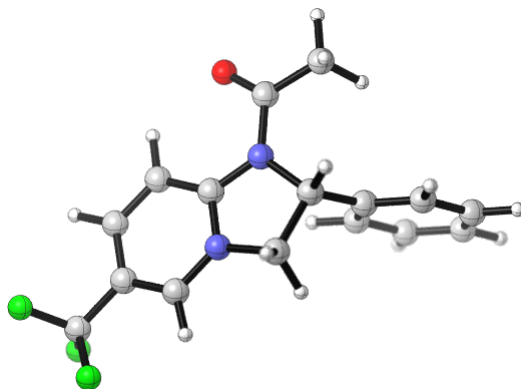

**Figure S-2.** Geometry of N-Acetyl-(R)-CF<sub>3</sub>-PIP<sup>+</sup> (5)

|   |             |             |             |
|---|-------------|-------------|-------------|
| C | -1.63316000 | 2.44286200  | 0.11307100  |
| O | -1.00481700 | 3.23007000  | 0.83179400  |
| C | -3.04624100 | 2.66820500  | -0.33754500 |
| H | -3.10706800 | 2.75562600  | -1.42920200 |
| H | -3.70763300 | 1.85421300  | -0.02589800 |
| H | -3.39204900 | 3.60180500  | 0.10570600  |
| N | -0.98547400 | 1.25417100  | -0.35283300 |
| C | 0.33619300  | 0.96312200  | -0.11852300 |
| C | -1.66483000 | 0.15014600  | -1.12931400 |
| C | 1.30774500  | 1.62906100  | 0.65497700  |
| N | 0.68665200  | -0.18152400 | -0.79220400 |
| C | -0.45118300 | -0.71245800 | -1.59918500 |
| C | 2.58487300  | 1.09024600  | 0.70982300  |
| H | 1.03283500  | 2.53095000  | 1.17851100  |
| C | 1.93203200  | -0.72185900 | -0.74120500 |
| H | -0.22368800 | -0.57709900 | -2.65986800 |
| H | -0.59890800 | -1.77088400 | -1.38227700 |
| C | 2.90464300  | -0.09638900 | 0.01041700  |
| H | 3.34979000  | 1.58825500  | 1.29484500  |
| H | 2.10928200  | -1.62594300 | -1.30765500 |
| C | 4.27630500  | -0.69100300 | 0.11307800  |
| F | 4.49254300  | -1.24081900 | 1.36775700  |
| F | 4.45614800  | -1.69570700 | -0.82657800 |
| F | 5.24962000  | 0.27373900  | -0.08461800 |
| H | -2.15406700 | 0.59348000  | -1.99937400 |
| C | -2.68405000 | -0.62686700 | -0.31336500 |
| C | -3.88860500 | -1.01202000 | -0.92458500 |
| C | -2.42524800 | -1.01660800 | 1.01220000  |
| C | -4.82123400 | -1.78324300 | -0.22213400 |
| H | -4.10168500 | -0.71020000 | -1.94675300 |
| C | -3.36176800 | -1.78169900 | 1.71379700  |
| H | -1.50754500 | -0.71497600 | 1.50918700  |
| C | -4.55894600 | -2.16830900 | 1.09727700  |
| H | -5.74926700 | -2.07472700 | -0.70117800 |
| H | -3.16000600 | -2.07275800 | 2.73877200  |
| H | -5.28364400 | -2.76088200 | 1.64435700  |

**(b) Conformational search on the transition state of a model system, N- Acetyl-DHIP<sup>+</sup> AcO<sup>-</sup>, with (R)- and (S)-1-phenylethanol, at HF/3-21G level of theory**

To locate the most stable conformations of the transition states, a conformational search was performed at HF/3-21G level on a model system. The unsubstituted heterocyclic core—2,3-dihydroimidazo[1,2-a]pyridine (DHIP)— was used as a simplified model of CF<sub>3</sub>-PIP in these calculations (Figure S3). Diastereomeric transition state structures (R)-TS<sub>HF</sub> and (S)-TS<sub>HF</sub> were obtained by complexing the (R)- and (S)-enantiomers of 1-phenylethanol hydrogen-bound to the acetate anion on the *Si*-face of the carbonyl carbon C<sup>2</sup>.

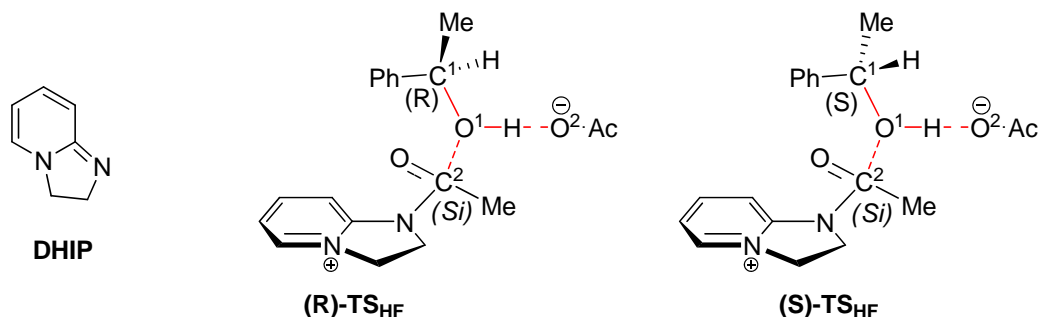

**Figure S-3.** Structures of DHIP-based diastereomeric transition states

For each of these structures, the starting geometries were generated by manually rotating each of the three highlighted bonds—C<sup>1</sup>-O<sup>1</sup>, O<sup>1</sup>-C<sup>2</sup>, and O<sup>1</sup>-H-O<sup>2</sup>—by 120°. Out of 27 structures thus generated for (R)-TS<sub>HF</sub>, 8 transition state conformers were produced (Figure S4). The analogous operation performed with (S)-TS<sub>HF</sub> resulted in 6 TS structures (Figure S5).

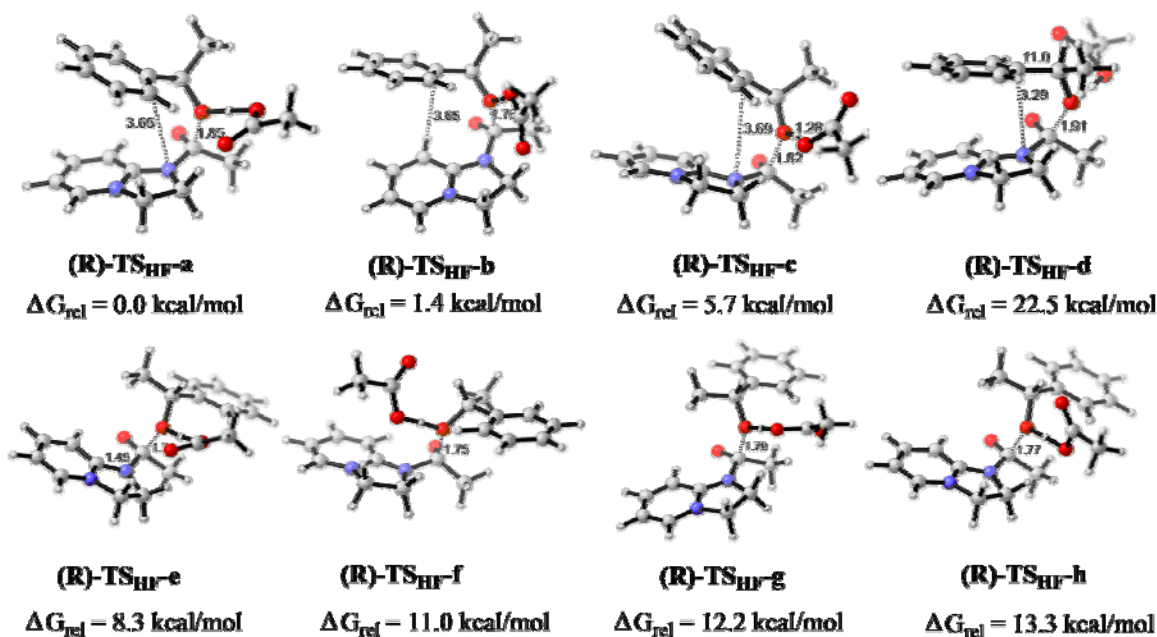

**Figure S-4.** TS of N-Acetyl-DHIP<sup>+</sup> AcO<sup>-</sup> and (R)-1-phenylethanol

**(R)-TS<sub>HF</sub>-a**

|   |             |             |             |
|---|-------------|-------------|-------------|
| C | 0.26654600  | -1.71200400 | -1.46664700 |
| O | 1.24944300  | -0.20003300 | -1.05987600 |
| C | 0.78052500  | 1.00125000  | -1.67163900 |
| O | -0.39914200 | -1.47241000 | -2.48367600 |
| C | 1.45688000  | -2.64406700 | -1.47652100 |
| O | 3.48042200  | -0.23482100 | -0.18321100 |
| C | 3.59264700  | -0.18081400 | 1.10112200  |
| O | 2.64304600  | -0.24594400 | 1.89493800  |
| C | 5.01575300  | -0.03139900 | 1.59896200  |
| H | 1.96926400  | -2.49165600 | -2.41392100 |
| H | 1.10113300  | -3.66821000 | -1.43423500 |
| H | 2.14547800  | -2.45356000 | -0.67238600 |
| H | 5.61630200  | -0.84361900 | 1.20838900  |
| H | 5.03540000  | -0.02929800 | 2.67706200  |
| H | 5.42911500  | 0.89282500  | 1.21316500  |
| H | 2.35008400  | -0.21382100 | -0.65768600 |
| N | -0.46129500 | -1.74370800 | -0.19937500 |
| C | -1.72351500 | -1.36209300 | -0.05668000 |
| C | 0.19992000  | -1.96585700 | 1.11038500  |
| C | -2.71479200 | -1.08051200 | -1.02775800 |
| N | -2.05842900 | -1.26783900 | 1.24562600  |
| C | -0.87567900 | -1.49777800 | 2.12573000  |
| H | 0.42212600  | -3.01586800 | 1.22973100  |
| H | 1.08709500  | -1.36401700 | 1.20188100  |
| C | -3.95463100 | -0.74162600 | -0.59981200 |
| H | -2.42273600 | -1.13788700 | -2.04775400 |
| C | -3.29865500 | -0.91706200 | 1.67277800  |
| H | -1.11246500 | -2.24450800 | 2.86653100  |
| H | -0.60082600 | -0.56386400 | 2.58906400  |
| C | -4.27321300 | -0.65689300 | 0.78045700  |

**(R)-TS<sub>HF</sub>-b**

|   |             |             |             |
|---|-------------|-------------|-------------|
| C | 0.74335900  | -0.25123300 | -2.14646300 |
| O | 0.37636900  | 1.07418800  | -1.05539900 |
| C | -0.88683700 | 1.71865900  | -1.30308800 |
| O | -0.29937200 | -0.53213000 | -2.77827300 |
| C | 1.93557400  | 0.37061800  | -2.84807900 |
| O | 1.53178700  | 2.21960200  | 0.70469200  |
| C | 2.48642500  | 1.83554800  | 1.49510500  |
| O | 3.06635600  | 0.75141700  | 1.43756900  |
| C | 2.85017000  | 2.87188900  | 2.53739900  |
| H | 1.54960200  | 1.13640300  | -3.50363900 |
| H | 2.42780700  | -0.38246200 | -3.45330400 |
| H | 2.63845000  | 0.81431100  | -2.16331900 |
| H | 3.15900500  | 3.78158500  | 2.03718200  |
| H | 3.64249000  | 2.50345400  | 3.16912800  |
| H | 1.97349800  | 3.10844200  | 3.12774000  |
| H | 1.04326100  | 1.59663800  | -0.17358400 |
| N | 1.16499100  | -1.21431000 | -1.11463600 |
| C | 0.30769500  | -1.96559200 | -0.43889200 |
| C | 2.54448700  | -1.34844500 | -0.58356500 |
| C | -1.07358100 | -2.18322400 | -0.65031700 |
| N | 0.90872500  | -2.58431700 | 0.59634800  |
| C | 2.33416400  | -2.15544400 | 0.72143600  |
| H | 3.16139200  | -1.87210400 | -1.29844400 |
| H | 2.95071900  | -0.39253800 | -0.31884600 |
| C | -1.73167200 | -2.99717400 | 0.20908900  |
| H | -1.51703700 | -1.68414600 | -1.47742400 |
| C | 0.24936600  | -3.40567800 | 1.45429500  |
| H | 2.97154700  | -3.02116300 | 0.80076900  |
| H | 2.43892500  | -1.49379600 | 1.56552800  |

**(R)-TS<sub>HF</sub>-c**

|   |             |             |             |
|---|-------------|-------------|-------------|
| C | -0.08736700 | 1.71625700  | -1.51021000 |
| O | -1.16301100 | 0.31137100  | -1.09612500 |
| C | -0.83968600 | -0.96488600 | -1.65749300 |
| O | 0.57642000  | 1.40741100  | -2.51015900 |
| C | -1.20820000 | 2.73168100  | -1.54487100 |
| O | -2.64841400 | 0.66427700  | 0.74699600  |

|   |             |             |             |
|---|-------------|-------------|-------------|
| H | -4.71477400 | -0.52753900 | -1.32343300 |
| H | -3.43485000 | -0.86464700 | 2.73132100  |
| H | -5.25241700 | -0.38299000 | 1.10669200  |
| C | -0.01655700 | 1.84837300  | -0.68934400 |
| C | -1.02382200 | 2.68107200  | -1.15366500 |
| C | 0.26487600  | 1.82670200  | 0.66984400  |
| C | -1.73647100 | 3.48853400  | -0.28381100 |
| H | -1.25329100 | 2.69732700  | -2.20276000 |
| C | -0.44583400 | 2.63800400  | 1.53955400  |
| H | 1.03723900  | 1.18930400  | 1.04980700  |
| C | -1.44818100 | 3.46984900  | 1.06939800  |
| H | -2.51028600 | 4.12881200  | -0.66072500 |
| H | -0.20636600 | 2.62799900  | 2.58586100  |
| H | -1.99253200 | 4.09882700  | 1.74649100  |
| C | 1.97250500  | 1.80309700  | -2.22581300 |
| H | 2.50708600  | 1.20368900  | -2.95332700 |
| H | 2.65398600  | 2.05212300  | -1.42367600 |
| H | 1.62999000  | 2.71536500  | -2.69896500 |
| H | 0.13435000  | 0.70103200  | -2.48551400 |

SCF: E(RHF) = -1135.40795892  
 Sum of electronic and zero-point  
 Energies=-1135.044929  
 Sum of electronic and thermal Energies=-  
 1135.022435  
 Sum of electronic and thermal  
 Enthalpies=-1135.021491  
 Sum of electronic and thermal Free  
 Energies=-1135.098177

|   |             |             |             |
|---|-------------|-------------|-------------|
| C | -1.06727200 | -3.63716600 | 1.28906700  |
| H | -2.78057000 | -3.16187600 | 0.07071200  |
| H | 0.83335900  | -3.83293000 | 2.24065900  |
| H | -1.59508200 | -4.28033000 | 1.95869400  |
| H | -1.22537700 | 1.34876700  | -2.25800700 |
| C | -1.91958600 | 1.34231700  | -0.25162800 |
| C | -3.22391200 | 1.06160900  | -0.62674800 |
| C | -1.58192900 | 1.28818700  | 1.09378200  |
| C | -4.18009200 | 0.73527300  | 0.32154200  |
| H | -3.49255400 | 1.09208300  | -1.66564300 |
| C | -2.53414700 | 0.96206100  | 2.04157600  |
| H | -0.57985300 | 1.52201900  | 1.38568500  |
| C | -3.83674200 | 0.68240400  | 1.66007500  |
| H | -5.18620000 | 0.52404000  | 0.01497600  |
| H | -2.26300400 | 0.93024900  | 3.07919800  |
| H | -4.57421600 | 0.43272000  | 2.39770600  |
| C | -0.68348900 | 3.24128100  | -1.35315200 |
| H | -1.62601200 | 3.74141800  | -1.54130600 |
| H | 0.01193900  | 3.48986300  | -2.14729600 |
| H | -0.27110600 | 3.58979500  | -0.41646200 |

SCF: E(RHF) = -1135.46300403  
 Sum of electronic and zero-point  
 Energies= -1135.041663  
 Sum of electronic and thermal Energies=-  
 -1135.019033  
 Sum of electronic and thermal  
 Enthalpies= -1135.018089  
 Sum of electronic and thermal Free  
 Energies= -1135.096005

|   |             |             |             |
|---|-------------|-------------|-------------|
| C | -3.85908800 | 0.18366000  | 0.90998200  |
| O | -4.35732700 | -0.69396100 | 0.22585500  |
| C | -4.60749400 | 0.82452300  | 2.06641100  |
| H | -1.74149800 | 2.58104300  | -2.47064500 |
| H | -0.78056600 | 3.72881700  | -1.54401300 |
| H | -1.89361300 | 2.61520300  | -0.72269500 |
| H | -4.04503600 | 0.67926900  | 2.98144400  |
| H | -5.58939700 | 0.38860000  | 2.15956400  |

|   |             |             |             |
|---|-------------|-------------|-------------|
| H | -4.68545800 | 1.89156800  | 1.89421200  |
| H | -1.94197300 | 0.39525800  | -0.29001600 |
| N | 0.63674200  | 1.73944800  | -0.22907100 |
| C | 1.86643600  | 1.27276100  | -0.06334700 |
| C | 0.00581200  | 2.09601500  | 1.06877400  |
| C | 2.83996100  | 0.88546200  | -1.01608700 |
| N | 2.18489800  | 1.19676300  | 1.24513900  |
| C | 1.00811800  | 1.51934400  | 2.10224800  |
| H | -0.06011800 | 3.17143600  | 1.14969500  |
| H | -0.96894400 | 1.64403700  | 1.14910300  |
| C | 4.04854200  | 0.47170700  | -0.56598000 |
| H | 2.55780100  | 0.93076400  | -2.03968300 |
| C | 3.39456200  | 0.77134300  | 1.69509300  |
| H | 1.28878800  | 2.23216900  | 2.86072000  |
| H | 0.64894800  | 0.60335500  | 2.54441000  |
| C | 4.35207100  | 0.41169100  | 0.81981000  |
| H | 4.79577300  | 0.17850300  | -1.27511900 |
| H | 3.52068100  | 0.74510400  | 2.75586700  |
| H | 5.30739000  | 0.07989500  | 1.16273600  |
| C | -0.11162600 | -1.84648100 | -0.65098600 |
| C | 0.84273600  | -2.75283100 | -1.08639400 |
| C | -0.40382900 | -1.78069500 | 0.70499100  |
| C | 1.49267000  | -3.58555500 | -0.19097700 |

|   |             |             |             |
|---|-------------|-------------|-------------|
| H | 1.07904700  | -2.80843100 | -2.13229100 |
| C | 0.24326700  | -2.61459500 | 1.60068500  |
| H | -1.14614200 | -1.09020500 | 1.04788800  |
| C | 1.19478800  | -3.51867400 | 1.15822200  |
| H | 2.22539100  | -4.28387100 | -0.54598400 |
| H | -0.00694200 | -2.57061400 | 2.64362200  |
| H | 1.69004400  | -4.16744300 | 1.85384400  |
| C | -2.13075500 | -1.63654800 | -2.15602300 |
| H | -2.54226200 | -1.05396100 | -2.97277700 |
| H | -2.86550500 | -1.66611700 | -1.36300500 |
| H | -1.92665000 | -2.64043500 | -2.50898800 |
| H | -0.17809700 | -0.75527400 | -2.48598100 |

SCF: E(RHF) = -1134.89591296  
Sum of electronic and zero-point  
Energies= -1135.035629  
Sum of electronic and thermal Energies=  
-1135.013333  
Sum of electronic and thermal  
Enthalpies= -1135.012389  
Sum of electronic and thermal Free  
Energies= -1135.089140

**(R)-TS<sub>HF-d</sub>**

|   |             |             |             |
|---|-------------|-------------|-------------|
| C | 0.82085400  | 1.46216800  | -0.57279300 |
| O | 1.52006600  | -0.21516900 | -1.15030700 |
| C | 1.36880300  | -1.59634600 | -0.75751500 |
| O | 1.04187300  | 1.66025700  | 0.62148600  |
| C | 1.56980100  | 2.18004000  | -1.67434500 |
| O | 3.74442500  | 0.44810300  | -0.33450200 |
| C | 3.93112900  | 0.20968100  | 0.95100300  |
| O | 3.27396400  | -0.57302500 | 1.61256900  |
| C | 5.08369400  | 1.00601800  | 1.51278600  |
| H | 2.61005600  | 2.20399100  | -1.39795800 |
| H | 1.18699000  | 3.19492000  | -1.73157800 |
| H | 1.46681800  | 1.68897900  | -2.62506000 |
| H | 5.96116200  | 0.84972300  | 0.89872000  |
| H | 5.27457800  | 0.71208600  | 2.53262500  |
| H | 4.83243400  | 2.05930400  | 1.46976700  |
| H | 2.81786400  | 0.12149200  | -0.73851500 |
| N | -0.57473900 | 1.20134400  | -0.93956000 |
| C | -1.59901900 | 1.29480900  | -0.10711200 |
| C | -0.97432800 | 0.65301200  | -2.24946400 |
| C | -1.67220000 | 1.82708500  | 1.20361900  |
| N | -2.73122100 | 0.84075700  | -0.68039200 |
| C | -2.45387100 | 0.24189400  | -2.01781000 |
| H | -0.89471900 | 1.41518000  | -3.01012600 |
| H | -0.32512600 | -0.17115500 | -2.46790900 |
| C | -2.88176000 | 1.87388700  | 1.80861400  |
| H | -0.76023600 | 2.13813100  | 1.65280500  |
| C | -3.94096600 | 0.86391100  | -0.06061500 |
| H | -3.12465300 | 0.66074300  | -2.75074800 |
| H | -2.57156200 | -0.82599000 | -1.94265700 |

|   |             |             |             |
|---|-------------|-------------|-------------|
| C | -4.05613400 | 1.38577300  | 1.17443900  |
| H | -2.95509000 | 2.28030200  | 2.79691100  |
| H | -4.76114200 | 0.45699500  | -0.61146100 |
| H | -5.00332800 | 1.41746000  | 1.66664200  |
| C | 0.08824800  | -1.86969200 | 0.03245700  |
| C | -0.96513200 | -2.63743900 | -0.43896200 |
| C | 0.00768500  | -1.34417100 | 1.32105200  |
| C | -2.08582300 | -2.87142300 | 0.34975600  |
| H | -0.91113400 | -3.08606300 | -1.41097900 |
| C | -1.10362600 | -1.57957100 | 2.10593700  |
| H | 0.83474500  | -0.76832600 | 1.68476500  |
| C | -2.15914000 | -2.34105200 | 1.62252400  |
| H | -2.88236700 | -3.48607500 | -0.02488300 |
| H | -1.14403800 | -1.17969500 | 3.10024000  |
| H | -3.01511600 | -2.53252100 | 2.24011700  |
| C | 1.51886700  | -2.45626100 | -2.01934000 |
| H | 2.47059800  | -2.22030400 | -2.47803500 |
| H | 0.74141800  | -2.23480700 | -2.74305300 |
| H | 1.49482200  | -3.51534800 | -1.78814200 |
| H | 2.17363000  | -1.84897400 | -0.08118300 |

SCF: E(RHF) = -1135.39717169  
Sum of electronic and zero-point  
Energies= -1135.009787  
Sum of electronic and thermal Energies=  
-1134.987559  
Sum of electronic and thermal  
Enthalpies= -1134.986615  
Sum of electronic and thermal Free  
Energies= -1135.062353

**(R)-TS<sub>HF-e</sub>**

|   |             |             |             |
|---|-------------|-------------|-------------|
| C | -0.03844200 | 1.12834300  | -0.91432600 |
| O | 0.49104600  | 0.00619700  | 0.25848500  |
| C | 1.48760100  | 0.33007900  | 1.26249700  |
| O | -0.01684000 | 2.29980400  | -0.46671900 |
| C | 0.83857700  | 0.74296500  | -2.09302900 |
| O | 0.60916000  | -2.36671800 | 0.04748800  |
| C | -0.21648600 | -3.25948700 | 0.53125900  |
| O | -1.42061200 | -3.09214200 | 0.68145000  |
| C | 0.45998700  | -4.56944300 | 0.87237900  |
| H | 1.82290100  | 1.13930900  | -1.90388600 |
| H | 0.43782000  | 1.21300600  | -2.98397000 |
| H | 0.91444800  | -0.32216400 | -2.23621700 |
| H | 0.96752700  | -4.94575300 | -0.00730000 |

|   |             |             |             |
|---|-------------|-------------|-------------|
| H | -0.26666600 | -5.28408700 | 1.22420800  |
| H | 1.21284800  | -4.39416400 | 1.63146300  |
| H | 0.45105600  | -1.20023400 | 0.11744500  |
| N | -1.39159400 | 0.51811000  | -1.05622700 |
| C | -2.44950200 | 0.93350400  | -0.37606600 |
| C | -1.66492300 | -0.76510200 | -1.74745700 |
| C | -2.65649400 | 2.13071000  | 0.35095400  |
| N | -3.45338100 | 0.03498100  | -0.43400000 |
| C | -3.00537700 | -1.21879500 | -1.11695700 |
| H | -1.74672900 | -0.59547200 | -2.81111300 |
| H | -0.88866400 | -1.47476000 | -1.53355700 |
| C | -3.85992700 | 2.31902400  | 0.94460400  |
| H | -1.84062400 | 2.81197100  | 0.38582500  |
| C | -4.65431000 | 0.22100700  | 0.16837000  |

|   |             |             |             |
|---|-------------|-------------|-------------|
| H | -3.74018900 | -1.52310200 | -1.84436300 |
| H | -2.81029300 | -1.97069500 | -0.36933500 |
| C | -4.89679600 | 1.35342600  | 0.85826600  |
| H | -4.03447400 | 3.22195800  | 1.49403700  |
| H | -5.36370800 | -0.57076300 | 0.06029700  |
| H | -5.84097300 | 1.51147500  | 1.33165400  |
| C | 2.86249100  | 0.49996200  | 0.62394100  |
| C | 3.57308200  | 1.68631000  | 0.64055600  |
| C | 3.41311400  | -0.60531800 | -0.02008400 |
| C | 4.82025500  | 1.76951500  | 0.03709400  |
| H | 3.16090100  | 2.55281900  | 1.11433100  |
| C | 4.65347100  | -0.52415100 | -0.61939500 |
| H | 2.84894500  | -1.51728600 | -0.05328000 |
| C | 5.36410400  | 0.66685800  | -0.59100700 |
| H | 5.35890900  | 2.69657700  | 0.05821500  |
| H | 5.06689600  | -1.38400200 | -1.10929800 |

|   |            |             |             |
|---|------------|-------------|-------------|
| H | 6.32840400 | 0.73097200  | -1.05565900 |
| C | 1.02513900 | 1.48760200  | 2.15057200  |
| H | 0.05241500 | 1.23787600  | 2.55753200  |
| H | 0.92597000 | 2.38980600  | 1.57405800  |
| H | 1.71957900 | 1.62565000  | 2.97146400  |
| H | 1.54309900 | -0.55977700 | 1.88039100  |

SCF: E(RHF) = -1135.41503499  
Sum of electronic and zero-point  
Energies= -1135.030860  
Sum of electronic and thermal Energies=  
-1135.008413  
Sum of electronic and thermal  
Enthalpies= -1135.007469  
Sum of electronic and thermal Free  
Energies= -1135.084946

**(R)-TS<sub>HF-f</sub>**

|   |             |             |             |
|---|-------------|-------------|-------------|
| C | -0.16781700 | 1.87841000  | -0.07518400 |
| O | 0.61065200  | 0.38793600  | 0.39745300  |
| C | 1.76266400  | 0.24060800  | 1.26660400  |
| O | -0.53994000 | 2.53643100  | 0.91375900  |
| C | 0.87430200  | 2.41974200  | -1.03510800 |
| O | -0.55658200 | -1.66624400 | 0.00259700  |
| C | -0.49604800 | -2.60853000 | 0.91999900  |
| O | 0.14629800  | -2.52681400 | 1.95157400  |
| C | -1.31490900 | -3.83542100 | 0.56812900  |
| H | 1.68217100  | 2.83188300  | -0.45136200 |
| H | 0.42447000  | 3.22304400  | -1.60827600 |
| H | 1.27368100  | 1.66702200  | -1.69138400 |
| H | -2.35420500 | -3.55086600 | 0.44874600  |
| H | -1.22144600 | -4.57710700 | 1.34510600  |
| H | -0.96902000 | -4.23818600 | -0.37651100 |
| H | 0.01307200  | -0.63588100 | 0.24592000  |
| N | -1.23675900 | 1.15587100  | -0.81538600 |
| C | -2.42945800 | 0.89172300  | -0.30262400 |
| C | -1.00055500 | 0.39375000  | -2.06111800 |
| C | -3.05978700 | 1.40840500  | 0.85576800  |
| N | -3.10059200 | 0.00128500  | -1.05780600 |
| C | -2.23239100 | -0.54436400 | -2.14139100 |
| H | -0.94933200 | 1.06897300  | -2.90185700 |
| H | -0.09478200 | -0.17449700 | -1.96903200 |
| C | -4.31420700 | 0.98654500  | 1.14276200  |
| H | -2.49344300 | 2.09253100  | 1.44101300  |
| C | -4.35590400 | -0.42664500 | -0.76457300 |
| H | -2.74805900 | -0.49393800 | -3.08642900 |
| H | -1.95142300 | -1.54433700 | -1.86569900 |

|   |             |             |             |
|---|-------------|-------------|-------------|
| C | -4.99634200 | 0.05081000  | 0.31972800  |
| H | -4.80510000 | 1.36631800  | 2.01574000  |
| H | -4.77853500 | -1.14382500 | -1.43471900 |
| H | -5.98555900 | -0.27506700 | 0.55605100  |
| C | 2.99880900  | 0.01088700  | 0.39976100  |
| C | 4.22113400  | 0.61858500  | 0.62649100  |
| C | 2.88633300  | -0.88060900 | -0.66439600 |
| C | 5.31021600  | 0.34690800  | -0.19063900 |
| H | 4.33787100  | 1.30603800  | 1.43889500  |
| C | 3.96784700  | -1.15448200 | -1.47556500 |
| H | 1.94563100  | -1.36455300 | -0.83309400 |
| C | 5.18824300  | -0.53688900 | -1.24334600 |
| H | 6.24922900  | 0.82866700  | 0.00057100  |
| H | 3.86595800  | -1.85026200 | -2.28574900 |
| H | 6.02963200  | -0.74795300 | -1.87355700 |
| C | 1.87985600  | 1.39338600  | 2.27057300  |
| H | 0.91589800  | 1.56157700  | 2.72306600  |
| H | 2.18270100  | 2.31715600  | 1.79761400  |
| H | 2.60082000  | 1.13506300  | 3.03765000  |
| H | 1.57588000  | -0.66928800 | 1.82134900  |

SCF: E(RHF) = -1135.36855976  
Sum of electronic and zero-point  
Energies= -1135.026506  
Sum of electronic and thermal Energies=  
-1135.004082  
Sum of electronic and thermal  
Enthalpies= -1135.003138  
Sum of electronic and thermal Free  
Energies= -1135.080582

**(R)-TS<sub>HF-g</sub>**

|   |             |             |             |
|---|-------------|-------------|-------------|
| C | -0.29783900 | 0.55238200  | -1.03264900 |
| O | 0.49330800  | -0.16858800 | 0.40309000  |
| C | 1.33394800  | 0.59746200  | 1.29197500  |
| O | -0.27650200 | 1.79047900  | -0.95402100 |
| C | 0.46948900  | -0.20852200 | -2.09281800 |
| O | 0.43894700  | -2.48932300 | 1.00761500  |
| C | 1.26470100  | -3.28776900 | 0.37925900  |
| O | 1.91628300  | -2.97201900 | -0.60995500 |
| C | 1.34129000  | -4.67498000 | 0.98341800  |
| H | 1.40601000  | 0.30878000  | -2.22810100 |
| H | -0.08959100 | -0.16377600 | -3.02226400 |
| H | 0.68542500  | -1.22690500 | -1.81987100 |
| H | 1.69488100  | -4.59548900 | 2.00449700  |
| H | 2.00628400  | -5.29609900 | 0.40484500  |
| H | 0.34926900  | -5.10915400 | 1.01572800  |
| H | 0.47476000  | -1.31023300 | 0.68686900  |
| N | -1.62841000 | -0.08109300 | -0.78272200 |
| C | -2.69209700 | 0.57287200  | -0.35849600 |
| C | -1.87104500 | -1.54437900 | -0.85365800 |
| C | -2.90107300 | 1.96356600  | -0.15518300 |
| N | -3.72166900 | -0.26737900 | -0.10835800 |

|   |             |             |             |
|---|-------------|-------------|-------------|
| C | -3.33103500 | -1.68520000 | -0.33640300 |
| H | -1.77789800 | -1.88139400 | -1.87377200 |
| H | -1.17541100 | -2.05687600 | -0.21449600 |
| C | -4.11584300 | 2.37551800  | 0.27315500  |
| H | -2.07706000 | 2.60407500  | -0.35656000 |
| C | -4.94228900 | 0.15108500  | 0.32519800  |
| H | -3.99184700 | -2.12992900 | -1.06402700 |
| H | -3.37922000 | -2.22284100 | 0.59796200  |
| C | -5.17572700 | 1.46012600  | 0.52519600  |
| H | -4.28586100 | 3.42182900  | 0.42717100  |
| H | -5.67107800 | -0.61347900 | 0.48849200  |
| H | -6.12977200 | 1.79893900  | 0.86503200  |
| C | 2.61266000  | 1.04987500  | 0.59123500  |
| C | 3.30420700  | 0.12253900  | -0.18306100 |
| C | 3.13690400  | 2.32351300  | 0.73151300  |
| C | 4.49429100  | 0.46855000  | -0.79334100 |
| H | 2.90777900  | -0.86427500 | -0.31671800 |
| C | 4.33161400  | 2.67019600  | 0.11828000  |
| H | 2.61910500  | 3.05921600  | 1.31123700  |
| C | 5.01473400  | 1.74465000  | -0.64481500 |
| H | 5.01482700  | -0.25846900 | -1.38559800 |
| H | 4.71994900  | 3.66305800  | 0.23664000  |

|      |             |                |             |                                         |
|------|-------------|----------------|-------------|-----------------------------------------|
| H    | 5.93851200  | 2.01097300     | -1.12005600 | Sum of electronic and zero-point        |
| C    | 0.52812200  | 1.71687800     | 1.96148800  | Energies= -1135.025119                  |
| H    | -0.37784600 | 1.28378900     | 2.36975100  | Sum of electronic and thermal Energies= |
| H    | 0.26071400  | 2.46438000     | 1.23367400  | -1135.002693                            |
| H    | 1.08797900  | 2.16254100     | 2.77518000  | Sum of electronic and thermal           |
| H    | 1.63428700  | -0.10351100    | 2.06635300  | Enthalpies= -1135.001749                |
|      |             |                |             | Sum of electronic and thermal Free      |
|      |             |                |             | Energies= -1135.078806                  |
| SCF: | E(RHF) =    | -1135.41751855 |             |                                         |

**(R)-TS<sub>HF-h</sub>**

|   |             |             |             |
|---|-------------|-------------|-------------|
| C | -0.32806500 | 0.90024200  | -1.12628200 |
| O | 0.45580700  | -0.06947300 | 0.13558100  |
| C | 1.35321700  | -0.42815300 | 1.16317600  |
| O | -0.33313500 | 2.10325200  | -0.81813200 |
| C | 0.46007900  | 0.37637900  | -2.30927200 |
| O | 0.74029200  | -2.41454100 | -0.28575100 |
| C | 0.93930300  | -3.19803400 | 0.75015100  |
| O | 1.01101400  | -2.80849400 | 1.90528700  |
| C | 1.08576300  | -4.66151700 | 0.37798500  |
| H | 1.43680400  | 0.83111500  | -2.26711200 |
| H | -0.03658300 | 0.69463700  | -3.21957500 |
| H | 0.57312300  | -0.69473700 | -2.29950400 |
| H | 0.21346200  | -4.98407000 | -0.17783700 |
| H | 1.20965700  | -5.26086800 | 1.26601300  |
| H | 1.94536600  | -4.77521000 | -0.27200700 |
| H | 0.59549600  | -1.18310900 | -0.03801800 |
| N | -1.63521000 | 0.19315100  | -1.00848600 |
| C | -2.67406800 | 0.67814500  | -0.35357300 |
| C | -1.86339400 | -1.21211100 | -1.43678200 |
| C | -2.90112400 | 1.97235200  | 0.18259600  |
| N | -3.64599600 | -0.25018900 | -0.21371000 |
| C | -3.20859300 | -1.57018700 | -0.74714700 |
| H | -1.95372200 | -1.24982000 | -2.51198200 |
| H | -1.05696000 | -1.84057000 | -1.09904500 |
| C | -4.08200400 | 2.21448700  | 0.79723800  |
| H | -2.11638600 | 2.68041900  | 0.06807600  |
| C | -4.83145900 | -0.00432800 | 0.40760100  |
| H | -3.94533400 | -1.94951900 | -1.43715300 |
| H | -3.07204000 | -2.25276600 | 0.07796800  |

|      |                                         |                |             |
|------|-----------------------------------------|----------------|-------------|
| C    | -5.08519700                             | 1.21368500     | 0.91918700  |
| H    | -4.26752000                             | 3.18802700     | 1.20359600  |
| H    | -5.51663000                             | -0.82308500    | 0.45659300  |
| H    | -6.01300100                             | 1.41790300     | 1.40699300  |
| C    | 2.69564100                              | 0.81380100     | 0.54803300  |
| C    | 3.31906400                              | -0.11153100    | -0.28594300 |
| C    | 3.33284200                              | 2.01651500     | 0.79617300  |
| C    | 4.54937300                              | 0.16164600     | -0.84811600 |
| H    | 2.82741600                              | -1.04178000    | -0.48978900 |
| C    | 4.57009600                              | 2.29283200     | 0.23167500  |
| H    | 2.87194200                              | 2.74998500     | 1.42460400  |
| C    | 5.18226200                              | 1.36848100     | -0.59016300 |
| H    | 5.01680200                              | -0.56364300    | -1.48523500 |
| H    | 5.04758400                              | 3.23145700     | 0.43491300  |
| H    | 6.13858300                              | 1.58116100     | -1.02611100 |
| C    | 0.66783400                              | 1.52916600     | 1.97513100  |
| H    | -0.28718200                             | 1.15128500     | 2.31989400  |
| H    | 0.49571600                              | 2.39896700     | 1.36367700  |
| H    | 1.26434700                              | 1.78488900     | 2.84298800  |
| H    | 1.51626500                              | -0.42641500    | 1.80754700  |
| SCF: | E(RHF) =                                | -1135.41976004 |             |
|      | Sum of electronic and zero-point        |                |             |
|      | Energies=                               | -1135.022499   |             |
|      | Sum of electronic and thermal Energies= |                |             |
|      | -1135.000076                            |                |             |
|      | Sum of electronic and thermal           |                |             |
|      | Enthalpies=                             | -1134.999132   |             |
|      | Sum of electronic and thermal Free      |                |             |
|      | Energies=                               | -1135.076972   |             |

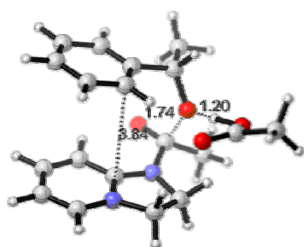

**(S)-TS<sub>HF-a</sub>**

$\Delta G_{\text{rel}} = 6.6 \text{ kcal/mol}$

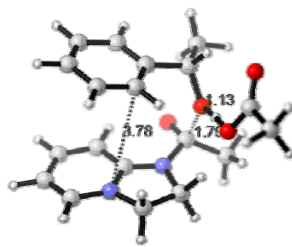

**(S)-TS<sub>HF-b</sub>**

$\Delta G_{\text{rel}} = 11.7 \text{ kcal/mol}$

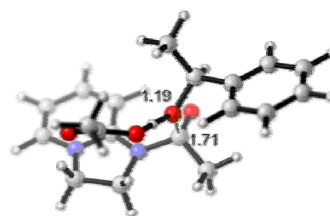

**(S)-TS<sub>HF-c</sub>**

$\Delta G_{\text{rel}} = 0.6 \text{ kcal/mol}$

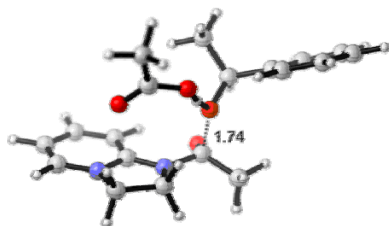

**(S)-TS<sub>HF-d</sub>**

$\Delta G_{\text{rel}} = 1.0 \text{ kcal/mol}$

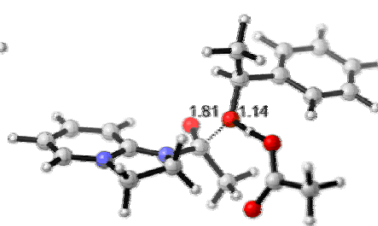

**(S)-TS<sub>HF-e</sub>**

$\Delta G_{\text{rel}} = 3.7 \text{ kcal/mol}$

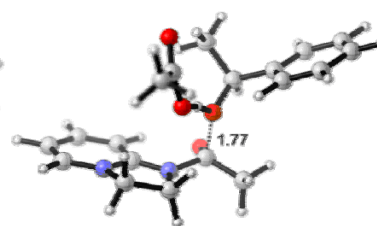

**(S)-TS<sub>HF-f</sub>**

$\Delta G_{\text{rel}} = 5.8 \text{ kcal/mol}$

**Figure S-5.** TS of N-Acetyl-DHIP+ AcO<sup>-</sup> and (S)-1-phenylethanol



**(S)-TS<sub>HF</sub>-a**

|   |             |             |             |
|---|-------------|-------------|-------------|
| C | -0.42249600 | -0.30447900 | -2.08696300 |
| O | -1.24769600 | -1.02434800 | -0.73111700 |
| C | -0.75486500 | -2.23942400 | -0.12665500 |
| O | 0.59206400  | -0.97102300 | -2.38476300 |
| C | -1.61609500 | -0.23447300 | -3.02361000 |
| O | -3.23149300 | -0.19851800 | 0.32790500  |
| C | -3.19815000 | 0.42733000  | 1.46768400  |
| O | -2.19088200 | 0.93437700  | 1.96534700  |
| C | -4.54550700 | 0.50473500  | 2.15333400  |
| H | -1.80481700 | -1.23718300 | -3.37476100 |
| H | -1.35329300 | 0.38688900  | -3.87251000 |
| H | -2.50719500 | 0.14270700  | -2.54996800 |
| H | -5.26820700 | 0.93727700  | 1.47294000  |
| H | -4.47207200 | 1.09072700  | 3.05544400  |
| H | -4.88002700 | -0.49935800 | 2.38590700  |
| H | -2.23604900 | -0.58893200 | -0.20189100 |
| N | -0.16767900 | 1.00535100  | -1.45471500 |
| C | 0.99775800  | 1.35326200  | -0.91859100 |
| C | -1.22918100 | 1.97863300  | -1.10967700 |
| C | 2.28252700  | 0.78579500  | -1.07476100 |
| N | 0.86077900  | 2.43703800  | -0.12968400 |
| C | -0.58210600 | 2.79633100  | 0.03315800  |
| H | -1.45401600 | 2.59216500  | -1.97062200 |
| H | -2.10611500 | 1.46380000  | -0.76991100 |
| C | 3.32113000  | 1.37087100  | -0.43136500 |
| H | 2.34934000  | -0.09378300 | -1.66747500 |
| C | 1.90066800  | 3.01773100  | 0.52141500  |
| H | -0.71088000 | 3.86088000  | -0.07528700 |
| H | -0.92973300 | 2.42849200  | 0.98502900  |

**(S)-TS<sub>HF</sub>-b**

|   |             |             |             |
|---|-------------|-------------|-------------|
| C | -0.25201000 | 0.67979800  | -2.02619600 |
| O | -1.40367900 | -0.24418200 | -1.01243900 |
| C | -1.34206000 | -1.67124500 | -0.77332300 |
| O | 0.47568900  | -0.09755400 | -2.66463900 |
| C | -1.32602800 | 1.51567200  | -2.69287400 |
| O | -2.64340500 | 0.90094100  | 0.68871200  |
| C | -3.73009000 | 0.34089100  | 1.16625400  |
| O | -4.09132400 | -0.79427700 | 0.90130400  |
| C | -4.51199300 | 1.24151700  | 2.10467100  |
| H | -1.84057400 | 0.87355200  | -3.39000900 |
| H | -0.85069100 | 2.32185400  | -3.24158700 |
| H | -2.03957100 | 1.91294600  | -1.99043900 |
| H | -3.87632400 | 1.53490700  | 2.93196900  |
| H | -5.38590400 | 0.72659900  | 2.47069800  |
| H | -4.80110600 | 2.14249500  | 1.57653600  |
| H | -2.03467100 | 0.28241300  | -0.23173400 |
| N | 0.40642800  | 1.42655700  | -0.93269500 |
| C | 1.62657100  | 1.16319200  | -0.48672200 |
| C | -0.25208300 | 2.49504900  | -0.13395300 |
| C | 2.61143100  | 0.26805400  | -0.97344000 |
| N | 1.92265900  | 1.91326700  | 0.59443200  |
| C | 0.74995800  | 2.71934800  | 1.02998500  |
| H | -0.35483600 | 3.38442600  | -0.73768900 |
| H | -1.20638200 | 2.15501800  | 0.23109300  |
| C | 3.80126900  | 0.21330000  | -0.33201300 |
| H | 2.34507400  | -0.32714200 | -1.81204700 |
| C | 3.11926300  | 1.85496200  | 1.23985800  |
| H | 1.03636300  | 3.75245000  | 1.14639100  |
| H | 0.37754800  | 2.31892500  | 1.96051400  |

**(S)-TS<sub>HF</sub>-c**

|   |             |            |             |
|---|-------------|------------|-------------|
| C | -0.24790100 | 1.41652600 | -0.92350500 |
| O | 0.58265800  | 0.23122600 | -0.00645500 |
| C | 1.51410700  | 0.75250300 | 0.96155500  |
| O | -0.27760000 | 2.49258000 | -0.27714200 |
| C | 0.53542400  | 1.32148900 | -2.21989400 |

|   |             |             |             |
|---|-------------|-------------|-------------|
| C | 3.14510500  | 2.52023200  | 0.38256900  |
| H | 4.30052200  | 0.95035900  | -0.53374500 |
| H | 1.66410700  | 3.86521400  | 1.12770700  |
| H | 3.97131500  | 2.97281500  | 0.88582600  |
| C | 0.54574900  | -1.98119000 | 0.63130900  |
| C | 1.70120300  | -2.71680800 | 0.43195500  |
| C | 0.54860700  | -0.97871700 | 1.59736500  |
| C | 2.83573900  | -2.47290000 | 1.19191300  |
| H | 1.72852500  | -3.47986000 | 0.31749200  |
| C | 1.67674000  | -0.73993300 | 2.35854400  |
| H | -0.33420400 | -0.39030300 | 1.75585000  |
| C | 2.82671300  | -1.48816000 | 2.16058600  |
| H | 3.71991800  | -3.05756000 | 1.02660000  |
| H | 1.65655800  | 0.02493500  | 3.11060800  |
| H | 3.69954200  | -1.30840500 | 2.75777700  |
| C | -0.70472000 | -3.37480400 | -1.15408900 |
| H | 0.01203500  | -3.14227600 | -1.92391100 |
| H | -1.68565400 | -3.46761100 | -1.60553000 |
| H | -0.46124500 | -4.31538700 | -0.67369600 |
| H | -1.49890900 | -2.50044000 | 0.62020300  |

SCF: E(RHF) = -1135.42545416  
Sum of electronic and zero-point  
Energies= -1135.035616  
Sum of electronic and thermal Energies=  
-1135.013383  
Sum of electronic and thermal  
Enthalpies= -1135.012438  
Sum of electronic and thermal Free  
Energies= -1135.087723

|   |             |             |             |
|---|-------------|-------------|-------------|
| C | 4.08213100  | 1.02548700  | 0.80018900  |
| H | 4.55188000  | -0.46389800 | -0.68509100 |
| H | 3.22838500  | 2.49534100  | 2.08847100  |
| H | 5.02593800  | 0.97341000  | 1.29729300  |
| C | -0.15486800 | -1.98652000 | 0.13345200  |
| C | 0.77501800  | -2.97656900 | -0.12782600 |
| C | -0.02875000 | -1.24681600 | 1.30820500  |
| C | 1.80748600  | -3.23295600 | 0.76477100  |
| H | 0.70322100  | -3.55550800 | -1.02521200 |
| C | 0.99423100  | -1.50293800 | 2.19807500  |
| H | -0.75261300 | -0.48274200 | 1.51239600  |
| C | 1.92080300  | -2.50039500 | 1.92893500  |
| H | 2.51491400  | -4.00958300 | 0.54740300  |
| H | 1.06536100  | -0.93881500 | 3.10843100  |
| H | 2.71138600  | -2.70618900 | 2.62385500  |
| C | -1.38072700 | -2.43076100 | -2.10057500 |
| H | -0.51068000 | -2.20240700 | -2.69344600 |
| H | -2.26110700 | -2.11042100 | -2.64402600 |
| H | -1.46037900 | -3.49777200 | -1.92733200 |
| H | -2.24439700 | -1.89246800 | -0.21694900 |

SCF: E(RHF) = -1135.39898071  
Sum of electronic and zero-point  
Energies= -1135.026097  
Sum of electronic and thermal Energies=  
-1135.003723  
Sum of electronic and thermal  
Enthalpies= -1135.002779  
Sum of electronic and thermal Free  
Energies= -1135.079539

|   |             |             |             |
|---|-------------|-------------|-------------|
| O | 0.62428100  | -2.15092700 | -0.16672700 |
| C | -0.17379000 | -3.06873300 | 0.30730800  |
| O | -1.38348900 | -2.93993500 | 0.46203700  |
| C | 0.53709200  | -4.36454700 | 0.63755000  |
| H | 1.50645100  | 1.75649000  | -2.03956100 |
| H | 0.02659700  | 1.90468900  | -2.97885900 |

|   |             |             |             |
|---|-------------|-------------|-------------|
| H | 0.66879400  | 0.30689300  | -2.55740700 |
| H | 1.06805200  | -4.71174800 | -0.24014600 |
| H | -0.17232900 | -5.10575800 | 0.96910600  |
| H | 1.27407500  | -4.17900500 | 1.40995600  |
| H | 0.51279400  | -0.95840800 | -0.08158000 |
| N | -1.53088200 | 0.68516800  | -1.02055000 |
| C | -2.57421200 | 0.92061300  | -0.23677400 |
| C | -1.73070400 | -0.52985200 | -1.84633400 |
| C | -2.81900700 | 1.98266600  | 0.66633100  |
| N | -3.51546300 | -0.03247600 | -0.37841300 |
| C | -3.03471200 | -1.13717900 | -1.26572900 |
| H | -1.83444400 | -0.25337700 | -2.88485100 |
| H | -0.90459900 | -1.20306600 | -1.70901500 |
| C | -3.99608600 | 1.99253100  | 1.33847300  |
| H | -2.05058700 | 2.71123400  | 0.76390200  |
| C | -4.68751300 | -0.02772500 | 0.30347200  |
| H | -3.77788000 | -1.35090600 | -2.01654800 |
| H | -2.79002100 | -1.98320500 | -0.64572300 |
| C | -4.96681100 | 0.97309500  | 1.16258900  |
| H | -4.19802700 | 2.79117300  | 2.02329700  |
| H | -5.34438000 | -0.84951800 | 0.11683000  |
| H | -5.88911800 | 0.98780100  | 1.70072100  |
| C | 2.94880700  | 0.64140800  | 0.47531700  |
| C | 3.38820300  | -0.48987400 | -0.20036700 |

|   |            |             |             |
|---|------------|-------------|-------------|
| C | 3.84611300 | 1.66548900  | 0.73107900  |
| C | 4.70724700 | -0.58890200 | -0.60342600 |
| H | 2.69934300 | -1.28616600 | -0.39556000 |
| C | 5.16799300 | 1.56495000  | 0.32930100  |
| H | 3.50991200 | 2.54929500  | 1.23940000  |
| C | 5.60188400 | 0.43590300  | -0.34030100 |
| H | 5.03848500 | -1.46660600 | -1.12360300 |
| H | 5.85088000 | 2.36640800  | 0.53308000  |
| H | 6.62351100 | 0.35502000  | -0.65597800 |
| C | 1.32638800 | -0.00185700 | 2.28651200  |
| H | 1.55039100 | -1.05096000 | 2.14604600  |
| H | 0.29993400 | 0.09540400  | 2.62150100  |
| H | 1.98749000 | 0.39998700  | 3.04459900  |
| H | 1.24716200 | 1.79090600  | 1.08048900  |

SCF: E(RHF) = -1135.42162748  
Sum of electronic and zero-point  
Energies= -1135.042386  
Sum of electronic and thermal Energies=  
-1135.019816  
Sum of electronic and thermal  
Enthalpies= -1135.018872  
Sum of electronic and thermal Free  
Energies= -1135.097182

**(S)-TS<sub>RHF-d</sub>**

|   |             |             |             |
|---|-------------|-------------|-------------|
| C | -0.13510400 | 1.62373100  | -0.77456600 |
| O | 0.69289200  | 0.28871000  | -0.02051400 |
| C | 1.67131200  | 0.65979000  | 0.96668500  |
| O | -0.16855600 | 2.57966100  | 0.03309100  |
| C | 0.69480600  | 1.71245400  | -2.04132800 |
| O | 0.35752300  | -2.07350800 | -0.12613900 |
| C | -0.72460200 | -2.70523900 | 0.22462200  |
| O | -1.84514000 | -2.20141000 | 0.25547300  |
| C | -0.48869400 | -4.15808700 | 0.58083600  |
| H | 1.65658300  | 2.11720100  | -1.76588500 |
| H | 0.21407400  | 2.39780100  | -2.73054300 |
| H | 0.84607100  | 0.75442800  | -2.50964200 |
| H | 0.01762000  | -4.64948000 | -0.24061100 |
| H | -1.42480200 | -4.64779800 | 0.79773000  |
| H | 0.16704200  | -4.20886400 | 1.44207000  |
| H | 0.45380700  | -0.87137400 | -0.08835000 |
| N | -1.40436300 | 0.91593700  | -1.00787800 |
| C | -2.42819400 | 0.94840700  | -0.16266300 |
| C | -1.59582300 | -0.11592600 | -2.05278900 |
| C | -2.61173900 | 1.71034500  | 1.01353300  |
| N | -3.41326400 | 0.12631400  | -0.55862400 |
| C | -3.03668500 | -0.63172700 | -1.78261300 |
| H | -1.51034300 | 0.32705300  | -3.03159800 |
| H | -0.86866400 | -0.89719100 | -1.92146100 |
| C | -3.76396700 | 1.54404800  | 1.70860200  |
| H | -1.82440400 | 2.37270300  | 1.28189100  |
| C | -4.55316300 | -0.05922900 | 0.14890700  |
| H | -3.72232800 | -0.38259400 | -2.57758500 |
| H | -3.03806600 | -1.67699100 | -1.54235300 |

|   |             |             |             |
|---|-------------|-------------|-------------|
| C | -4.76800000 | 0.63891200  | 1.28215500  |
| H | -3.91743300 | 2.10821700  | 2.60621800  |
| H | -5.24169700 | -0.77466600 | -0.24479000 |
| H | -5.66569800 | 0.50237100  | 1.84410200  |
| C | 3.08004400  | 0.38034300  | 0.47399100  |
| C | 4.10328400  | 1.27468100  | 0.74132700  |
| C | 3.36642900  | -0.78529700 | -0.22554900 |
| C | 5.39885400  | 1.01285700  | 0.32536700  |
| H | 3.88770100  | 2.18296200  | 1.27172200  |
| C | 4.65868400  | -1.04605000 | -0.64158300 |
| H | 2.57994600  | -1.48407400 | -0.42664500 |
| C | 5.67948100  | -0.14916800 | -0.36860000 |
| H | 6.18075500  | 1.71538600  | 0.53839000  |
| H | 4.87136800  | -1.94971200 | -1.17902100 |
| H | 6.68016200  | -0.35478300 | -0.69462600 |
| C | 1.38758000  | -0.10223700 | 2.27122000  |
| H | 1.46412000  | -1.16691600 | 2.09682700  |
| H | 0.38400200  | 0.12481200  | 2.61329100  |
| H | 2.09772000  | 0.18396700  | 3.03742800  |
| H | 1.53508700  | 1.71851400  | 1.12836400  |

SCF: E(RHF) = -1135.40982363  
Sum of electronic and zero-point  
Energies= -1135.042719  
Sum of electronic and thermal Energies=  
-1135.020304  
Sum of electronic and thermal  
Enthalpies= -1135.019359  
Sum of electronic and thermal Free  
Energies= -1135.096648

**(S)-TS<sub>RHF-e</sub>**

|   |             |             |             |
|---|-------------|-------------|-------------|
| C | 0.53970800  | 0.56409100  | 1.02767100  |
| O | -0.60050200 | -0.01916700 | -0.25240100 |
| C | -1.29130600 | 1.01230000  | -0.97772700 |
| O | 0.53931800  | 1.80339700  | 1.02639500  |
| C | -0.03654000 | -0.25682400 | 2.15628400  |
| O | -1.48218700 | -2.22741500 | -0.61780200 |
| C | -1.19877000 | -3.28679400 | 0.06620500  |
| O | -0.28095900 | -3.37552000 | 0.89073500  |
| C | -2.10116700 | -4.47218600 | -0.21991000 |
| H | -1.01432900 | 0.14209300  | 2.38139400  |
| H | 0.60104100  | -0.12398200 | 3.02435700  |
| H | -0.11719900 | -1.30411200 | 1.92212500  |

|   |             |             |             |
|---|-------------|-------------|-------------|
| H | -3.11402700 | -4.22439600 | 0.07609900  |
| H | -1.75928800 | -5.33983400 | 0.32140200  |
| H | -2.11192000 | -4.66437400 | -1.28536800 |
| H | -0.98806900 | -1.07944600 | -0.39451600 |
| N | 1.75185800  | -0.07099700 | 0.44680300  |
| C | 2.88417100  | 0.56936400  | 0.22146600  |
| C | 1.77971300  | -1.42511900 | -0.16730600 |
| C | 3.24369600  | 1.92623600  | 0.43079600  |
| N | 3.82387100  | -0.27167200 | -0.27278700 |
| C | 3.29444200  | -1.66760400 | -0.33332400 |
| H | 1.28075100  | -2.15772900 | 0.44247100  |
| H | 1.27906100  | -1.36504700 | -1.11967400 |
| C | 4.50787800  | 2.30837700  | 0.13481600  |
| H | 2.48369500  | 2.57632500  | 0.79214200  |

|   |             |             |             |                                         |                |             |             |
|---|-------------|-------------|-------------|-----------------------------------------|----------------|-------------|-------------|
| C | 5.09228400  | 0.11678000  | -0.56782600 | H                                       | -4.80989300    | 3.82492600  | 0.15621800  |
| H | 3.71363500  | -2.23051600 | 0.48794000  | H                                       | -6.26106900    | 1.95871300  | 0.84205000  |
| H | 3.54775400  | -2.12179600 | -1.27732600 | C                                       | -1.35181900    | 0.61505100  | -2.46137300 |
| C | 5.46927900  | 1.39516300  | -0.37928300 | H                                       | -1.88041100    | -0.32402900 | -2.56383200 |
| H | 4.79079700  | 3.33086400  | 0.28321400  | H                                       | -0.34721300    | 0.49200200  | -2.85240500 |
| H | 5.74151300  | -0.64249100 | -0.94777000 | H                                       | -1.86340400    | 1.37635000  | -3.03751200 |
| H | 6.46180800  | 1.71194100  | -0.61370800 | H                                       | -0.70257000    | 1.90635000  | -0.84126700 |
| C | -2.68801800 | 1.26495500  | -0.43216300 | SCF: E(RHF) =                           | -1135.40523051 |             |             |
| C | -3.50865400 | 0.21633700  | -0.03994800 | Sum of electronic and zero-point        |                |             |             |
| C | -3.16936800 | 2.56194300  | -0.35410200 | Energies=                               | -1135.038056   |             |             |
| C | -4.78987000 | 0.46931900  | 0.41603900  | Sum of electronic and thermal Energies= | -1135.015641   |             |             |
| H | -3.14567900 | -0.78851300 | -0.10450200 | Sum of electronic and thermal           |                |             |             |
| C | -4.45280000 | 2.81522800  | 0.09907800  | Enthalpies=                             | -1135.014697   |             |             |
| H | -2.53450900 | 3.37979800  | -0.63735300 | Sum of electronic and thermal Free      |                |             |             |
| C | -5.26763200 | 1.76722800  | 0.48658600  | Energies=                               | -1135.092233   |             |             |
| H | -5.41659600 | -0.34783200 | 0.71642100  |                                         |                |             |             |

### (S)-TS<sub>HF</sub>-f

|   |             |             |             |
|---|-------------|-------------|-------------|
| C | -0.43331000 | 1.73760600  | -0.88557500 |
| O | 0.50673400  | 0.49827900  | -0.03350100 |
| C | 1.50207800  | 0.99951000  | 0.87501100  |
| O | -0.57710800 | 2.71530500  | -0.12727400 |
| C | 0.41119400  | 1.84034800  | -2.13877600 |
| O | -0.05127100 | -1.82070500 | -0.30072200 |
| C | 0.19674000  | -2.81632700 | 0.51954200  |
| O | 0.55161200  | -2.70226200 | 1.67921800  |
| C | -0.00997200 | -4.17927700 | -0.12137600 |
| H | 1.32485900  | 2.34882300  | -1.87126000 |
| H | -0.11875400 | 2.44489200  | -2.86659200 |
| H | 0.66079500  | 0.88244000  | -2.56023700 |
| H | -1.03929900 | -4.28072500 | -0.44747800 |
| H | 0.22958100  | -4.95781800 | 0.58511500  |
| H | 0.62120900  | -4.25982700 | -0.99796400 |
| H | 0.24287000  | -0.64317700 | -0.05187600 |
| N | -1.60555500 | 0.86935700  | -1.08201800 |
| C | -2.60878300 | 0.80354400  | -0.21640600 |
| C | -1.67160200 | -0.22745100 | -2.07827400 |
| C | -2.94739800 | 1.66475000  | 0.85334700  |
| N | -3.38955000 | -0.26772100 | -0.45524800 |
| C | -2.79776300 | -1.13114800 | -1.51996600 |
| H | -1.91056600 | 0.17558300  | -3.05070300 |
| H | -0.75004000 | -0.77610300 | -2.08230300 |
| C | -4.05383400 | 1.37538300  | 1.58074300  |
| H | -2.29834100 | 2.48949200  | 1.02652000  |
| C | -4.49645200 | -0.55877300 | 0.27633300  |
| H | -3.54951900 | -1.38911800 | -2.24755800 |
| H | -2.35902600 | -1.99413400 | -1.05025400 |

|                                         |                |             |             |
|-----------------------------------------|----------------|-------------|-------------|
| C                                       | -4.86259900    | 0.24441100  | 1.29419400  |
| H                                       | -4.32536300    | 2.01657100  | 2.39457600  |
| H                                       | -5.03040100    | -1.44066300 | -0.00477800 |
| H                                       | -5.73243800    | 0.02607600  | 1.87400400  |
| C                                       | 2.89875600     | 0.62672000  | 0.40445700  |
| C                                       | 3.99291400     | 1.36044800  | 0.83950400  |
| C                                       | 3.10634200     | -0.44748200 | -0.44600100 |
| C                                       | 5.27392600     | 1.02365600  | 0.44123400  |
| H                                       | 3.84204700     | 2.20139100  | 1.49009300  |
| C                                       | 4.38796300     | -0.78690600 | -0.84388000 |
| H                                       | 2.26581900     | -1.01473100 | -0.78443100 |
| C                                       | 5.47584200     | -0.05443300 | -0.40340700 |
| H                                       | 6.10969400     | 1.60123100  | 0.78506400  |
| H                                       | 4.53671200     | -1.62439100 | -1.49749900 |
| H                                       | 6.46754000     | -0.31837400 | -0.71413500 |
| C                                       | 1.22192300     | 0.46860200  | 2.29071200  |
| H                                       | 1.18886000     | -0.61104700 | 2.28766400  |
| H                                       | 0.26044500     | 0.84512400  | 2.62436200  |
| H                                       | 1.98602500     | 0.80870900  | 2.97956100  |
| H                                       | 1.38749400     | 2.07430300  | 0.87071700  |
| SCF: E(RHF) =                           | -1135.42244652 |             |             |
| Sum of electronic and zero-point        |                |             |             |
| Energies=                               | -1135.034122   |             |             |
| Sum of electronic and thermal Energies= | -1135.011607   |             |             |
| Sum of electronic and thermal           |                |             |             |
| Enthalpies=                             | -1135.010663   |             |             |
| Sum of electronic and thermal Free      |                |             |             |
| Energies=                               | -1135.088984   |             |             |

### (c) Transition state geometries of N-Acetyl-(R)-CF<sub>3</sub>-PIP<sup>+</sup> AcO<sup>-</sup> and N-Propionyl-(R)-CF<sub>3</sub>-PIP<sup>+</sup> EtCO<sub>2</sub><sup>-</sup> with (R)- and (S)-1-phenylethanol at B3LYP/6-31G\* level of theory

**C1.** The lowest-energy stacked and splayed conformers of (R)-TS<sub>HF</sub> (structures (R)-TS<sub>HF</sub>.a and (R)-TS<sub>HF</sub>.h, respectively) and the lowest-energy stacked and splayed conformers of (S)-TS<sub>HF</sub> (structures (S)-TS<sub>HF</sub>.a and (S)-TS<sub>HF</sub>.c, respectively), obtained as described in the preceding section, were transformed into (R)-CF<sub>3</sub>-PIP derivatives by attaching a trifluoromethyl group at C6 and a phenyl group to the α-face of C2. The resulting structures **7a**, **7b**, **8a**, and **8b** were optimized at B3LYP/6-31G\* level of theory.

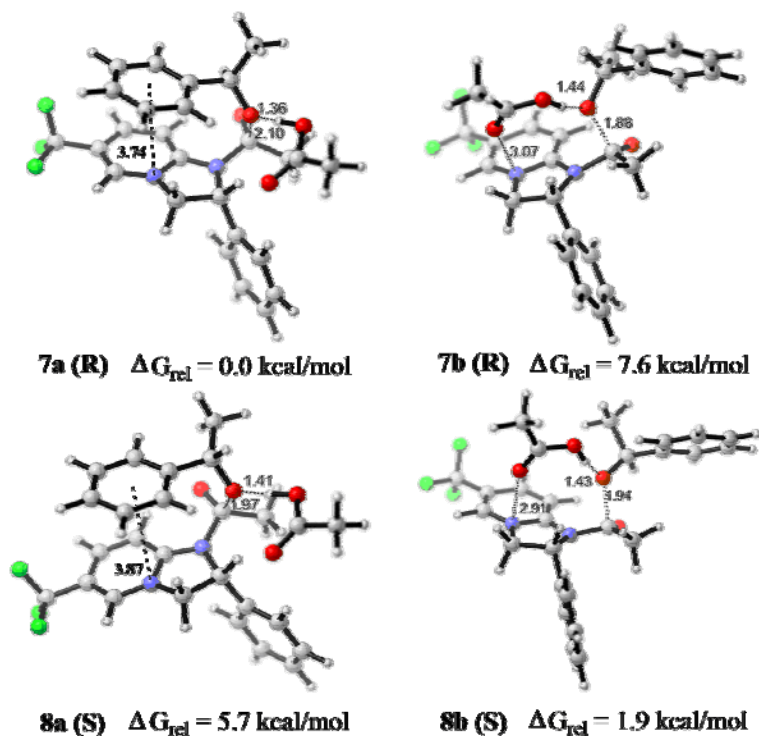

**Figure S-6.** TS of Ac-CF<sub>3</sub>-PIP acetate and 1-phenylethanol

|               |             |             |                                         |             |             |
|---------------|-------------|-------------|-----------------------------------------|-------------|-------------|
| <b>7a</b>     |             |             | H -2.37213700                           | 2.71241800  | -1.48975600 |
| C 1.22172300  | -0.08562300 | -2.16872300 | C -1.21514500                           | 2.55083600  | 2.19928900  |
| O 1.40547200  | 1.66425700  | -1.02803700 | H 0.78524100                            | 2.42249900  | 1.39863000  |
| C 0.36668800  | 2.55304800  | -1.30250200 | C -2.58051800                           | 2.63166400  | 1.90648900  |
| O 0.50007500  | 0.16743400  | -3.12131200 | H -4.05176100                           | 2.73933200  | 0.33271100  |
| C 2.71584700  | -0.26472000 | -2.28734100 | H -0.88310300                           | 2.51723200  | 3.23502500  |
| O 3.51382000  | 2.56000400  | -0.11778500 | H -3.31399100                           | 2.65488200  | 2.70879500  |
| C 3.86119000  | 2.01956200  | 1.02159500  | C 0.89361000                            | 3.97390300  | -1.58964000 |
| O 3.24256600  | 1.12161800  | 1.60372500  | H 1.60151200                            | 3.93764300  | -2.42467200 |
| C 5.13900100  | 2.60688200  | 1.59580400  | H 1.41643100                            | 4.37782100  | -0.71578300 |
| H 3.07383500  | 0.48996500  | -2.98831800 | H 0.07643600                            | 4.65743200  | -1.84983800 |
| H 2.92236500  | -1.26054700 | -2.69991200 | H -0.15205400                           | 2.21029300  | -2.21780600 |
| H 3.24852200  | -0.15612000 | -1.34369400 | C 2.16081100                            | -2.23538300 | 0.32696500  |
| H 5.95957600  | 2.48225400  | 0.88103400  | C 3.33800200                            | -2.20089100 | 1.08704700  |
| H 5.39078800  | 2.11974000  | 2.53933600  | C 1.79778400                            | -3.42279100 | -0.32093500 |
| H 5.01362900  | 3.68326400  | 1.75502500  | C 4.13158200                            | -3.34357500 | 1.20243500  |
| H 2.56792400  | 2.16060800  | -0.51399100 | H 3.62755300                            | -1.27262300 | 1.57374500  |
| N 0.59882900  | -0.79730700 | -1.02005000 | C 2.59647700                            | -4.56144700 | -0.20883500 |
| C -0.73081900 | -0.88541600 | -0.88146800 | H 0.89909000                            | -3.45536600 | -0.93188500 |
| C 1.29179000  | -0.98975800 | 0.28268300  | C 3.76405400                            | -4.52513000 | 0.55625200  |
| C -1.76898400 | -0.83901600 | -1.84974500 | H 5.04432200                            | -3.30623600 | 1.79117000  |
| N -1.07894100 | -1.07023200 | 0.43156900  | H 2.30866700                            | -5.47522500 | -0.72206100 |
| C 0.11761100  | -1.03778700 | 1.29978200  | H 4.38684400                            | -5.41151600 | 0.64220900  |
| H 1.89036500  | -0.09990900 | 0.48880000  | C -4.81269200                           | -1.18544600 | 0.40105300  |
| C -3.06870500 | -0.95643300 | -1.42331600 | F -4.91140100                           | -1.52347800 | 1.70405700  |
| H -1.49512800 | -0.69173000 | -2.88285700 | F -5.51046200                           | -2.09181100 | -0.31735400 |
| C -2.35703400 | -1.17780500 | 0.85679300  | F -5.43289400                           | 0.00275900  | 0.23864400  |
| H 0.14253700  | -1.93198900 | 1.92597200  | SCF: E(RB+HF-LYP) = -1716.95136698      |             |             |
| H 0.07300900  | -0.13953900 | 1.91955700  | Sum of electronic and zero-point        |             |             |
| C -3.38342400 | -1.12266600 | -0.04995400 | Energies= -1716.465171                  |             |             |
| H -3.87489800 | -0.92618700 | -2.14975000 | Sum of electronic and thermal Energies= |             |             |
| H -2.50599400 | -1.29786100 | 1.92204100  | -1716.432162                            |             |             |
| C -0.67356700 | 2.58109400  | -0.17459900 | Sum of electronic and thermal           |             |             |
| C -2.04379400 | 2.66713200  | -0.45268600 | Enthalpies= -1716.431218                |             |             |
| C -0.27246500 | 2.51762700  | 1.16889900  | Sum of electronic and thermal Free      |             |             |
| C -2.99260000 | 2.68855700  | 0.57378600  | Energies= -1716.533805                  |             |             |

**7b**

|   |             |             |             |
|---|-------------|-------------|-------------|
| C | -1.17952000 | -0.34495300 | 1.17291700  |
| O | -1.23260900 | 1.04727700  | -0.08619600 |
| C | -1.94405900 | 2.25787700  | 0.16862900  |
| O | -1.09808100 | 0.10428300  | 2.31338800  |
| C | -2.36296000 | -1.17459000 | 0.70867900  |
| O | -1.38259900 | 0.90570300  | -2.57462500 |
| C | -0.25276100 | 0.73386900  | -3.22731300 |
| O | 0.80574900  | 0.37018900  | -2.71742600 |
| C | -0.37966400 | 1.03587600  | -4.70894700 |
| H | -3.26676400 | -0.64775800 | 1.01287000  |
| H | -2.33952600 | -2.14700400 | 1.21303500  |
| H | -2.39565500 | -1.32525100 | -0.37144600 |
| H | -1.25329200 | 0.52679300  | -5.12787700 |
| H | 0.52562600  | 0.73121800  | -5.23671100 |
| H | -0.53607000 | 2.11158200  | -4.84903200 |
| H | -1.26270500 | 0.86405300  | -1.50916500 |
| N | 0.14850200  | -0.87607500 | 0.58557900  |
| C | 1.26229700  | -0.15124700 | 0.69513900  |
| C | 0.27204100  | -1.86837300 | -0.50789600 |
| C | 1.56244700  | 0.93554700  | 1.55993300  |
| N | 2.23366900  | -0.57753800 | -0.16918700 |
| C | 1.75802400  | -1.72878000 | -0.95569200 |
| H | -0.37162800 | -1.55546900 | -1.33330400 |
| C | 2.79463000  | 1.52781500  | 1.46137300  |
| H | 0.80014000  | 1.23854500  | 2.26168000  |
| C | 3.44818600  | 0.00607600  | -0.27710600 |
| H | 2.34817500  | -2.61108900 | -0.69231700 |
| H | 1.84180700  | -1.49671800 | -2.01635700 |
| C | 3.76312200  | 1.06994300  | 0.52658700  |
| H | 3.04003900  | 2.36509000  | 2.10759100  |
| H | 4.12194400  | -0.40708700 | -1.01651900 |
| C | -3.44879900 | 2.06016700  | 0.36987800  |
| C | -4.29947200 | 2.13894900  | -0.74138600 |
| C | -4.01947500 | 1.79907800  | 1.62434000  |
| C | -5.67897600 | 1.97195900  | -0.60967800 |

**8a**

|   |             |             |             |
|---|-------------|-------------|-------------|
| C | 1.09911100  | 0.31842000  | -2.00114400 |
| O | 1.90713200  | 1.62241100  | -0.75796000 |
| C | 1.40158400  | 2.93932300  | -0.66978600 |
| O | 0.35396400  | 0.85776500  | -2.81028700 |
| C | 2.44093500  | -0.26639800 | -2.39059900 |
| O | 4.19361100  | 1.66188100  | 0.20962900  |
| C | 4.27779800  | 1.09663800  | 1.39176500  |
| O | 3.36980600  | 0.47648000  | 1.94994800  |
| C | 5.64267500  | 1.27277600  | 2.03195000  |
| H | 2.93953800  | 0.46198800  | -3.03125100 |
| H | 2.26932300  | -1.18564000 | -2.96454500 |
| H | 3.08471700  | -0.49453000 | -1.54145200 |
| H | 6.41682500  | 0.85886900  | 1.37688500  |
| H | 5.67214600  | 0.77606200  | 3.00304600  |
| H | 5.86146800  | 2.33910700  | 2.15295800  |
| H | 3.20443100  | 1.58798700  | -0.21343300 |
| N | 0.41324200  | -0.45050100 | -0.89807300 |
| C | -0.91294100 | -0.48051400 | -0.75114400 |
| C | 1.09697300  | -0.99952500 | 0.30164900  |
| C | -1.96344000 | -0.19292200 | -1.66753900 |
| N | -1.25818500 | -0.90689800 | 0.50937900  |
| C | -0.04775100 | -1.03926800 | 1.34831600  |
| H | 1.85096100  | -0.28347000 | 0.63274200  |
| C | -3.25888900 | -0.38162200 | -1.26000400 |
| H | -1.69446500 | 0.16786700  | -2.64824900 |
| C | -2.53475100 | -1.08852600 | 0.91573500  |
| H | -0.07644200 | -1.97526600 | 1.90830400  |
| H | -0.00736400 | -0.18736200 | 2.03165700  |
| C | -3.56649900 | -0.84134900 | 0.04930900  |
| H | -4.07097500 | -0.17931300 | -1.95161700 |

|   |             |             |             |
|---|-------------|-------------|-------------|
| H | -3.86871600 | 2.32727900  | -1.72255100 |
| C | -5.39894200 | 1.63023400  | 1.76077900  |
| H | -3.37881000 | 1.70342000  | 2.49548100  |
| C | -6.23485300 | 1.72040100  | 0.64557900  |
| H | -6.31898400 | 2.04306700  | -1.48599900 |
| H | -5.82210600 | 1.42943700  | 2.74224900  |
| H | -7.30939200 | 1.59590600  | 0.75470000  |
| C | -1.29296700 | 3.09623500  | 1.27835400  |
| H | -0.24380300 | 3.27985700  | 1.02228000  |
| H | -1.32684800 | 2.59009100  | 2.24518800  |
| H | -1.79773800 | 4.06544500  | 1.37184400  |
| H | -1.84584200 | 2.84216200  | -0.76057100 |
| C | -0.06132800 | -3.29127900 | -0.09183800 |
| C | -0.62188300 | -4.16672500 | -1.02824700 |
| C | 0.24194700  | -3.76703400 | 1.19004100  |
| C | -0.86796700 | -5.49965200 | -0.69452300 |
| H | -0.87302100 | -3.80269900 | -2.02215600 |
| C | -0.01081100 | -5.09698200 | 1.52634800  |
| H | 0.65172500  | -3.08742900 | 1.93221000  |
| C | -0.56213400 | -5.96791400 | 0.58395000  |
| H | -1.30673700 | -6.16781300 | -1.43048500 |
| H | 0.21868800  | -5.45164400 | 2.52752700  |
| H | -0.75961600 | -7.00322800 | 0.84785300  |
| C | 5.10507100  | 1.73288300  | 0.44213100  |
| F | 5.78466500  | 1.61258300  | 1.60494600  |
| F | 4.98671200  | 3.05461500  | 0.19725200  |
| F | 5.86941000  | 1.19820800  | -0.53420600 |

SCF: E(RB+HF-LYP) = -1716.93686151  
Sum of electronic and zero-point  
Energies= -1716.451349  
Sum of electronic and thermal Energies=  
-1716.418392  
Sum of electronic and thermal  
Enthalpies= -1716.417448  
Sum of electronic and thermal Free  
Energies= -1716.521745

|   |             |             |             |
|---|-------------|-------------|-------------|
| H | -2.67687500 | -1.42780600 | 1.93387800  |
| C | 0.04033600  | 2.95681100  | 0.03477800  |
| C | -1.16036000 | 3.30534700  | -0.59237600 |
| C | -0.00238800 | 2.60218800  | 1.39420400  |
| C | -2.36897800 | 3.30129000  | 0.11294700  |
| H | -1.15716900 | 3.58552600  | -1.64104400 |
| C | -1.20313600 | 2.60122800  | 2.10373600  |
| H | 0.92679100  | 2.32942400  | 1.89131300  |
| C | -2.39711900 | 2.95022100  | 1.46223300  |
| H | -3.28902200 | 3.58163700  | -0.39489300 |
| H | -1.20770500 | 2.34749500  | 3.16201300  |
| H | -3.33439700 | 2.96121900  | 2.01316300  |
| C | 1.44643300  | 3.68329100  | -2.01198500 |
| H | 0.82072700  | 3.20107700  | -2.76533400 |
| H | 2.47816200  | 3.67390900  | -2.37885600 |
| H | 1.13514300  | 4.72918200  | -1.89662400 |
| H | 2.08424600  | 3.48160300  | 0.00960800  |
| C | 1.72354300  | -2.36755700 | 0.07609200  |
| C | 2.87243700  | -2.69909800 | 0.80760700  |
| C | 1.16114300  | -3.32075000 | -0.78169200 |
| C | 3.44145900  | -3.96778600 | 0.68641500  |
| H | 3.31627000  | -1.95352900 | 1.46270900  |
| C | 1.73510100  | -4.58691100 | -0.90527500 |
| H | 0.28308800  | -3.07121200 | -1.37189000 |
| C | 2.87513800  | -4.91461800 | -0.16903600 |
| H | 4.33465800  | -4.21265400 | 1.25505800  |
| H | 1.29307700  | -5.31566700 | -1.57961500 |
| H | 3.32281200  | -5.89993000 | -0.26701800 |
| C | -4.99214000 | -1.05310400 | 0.46230600  |
| F | -5.58907000 | -1.99251700 | -0.30427600 |
| F | -5.08768700 | -1.45264700 | 1.74853100  |
| F | -5.71647700 | 0.07754100  | 0.32596000  |

SCF: E(RB+HF-LYP) = -1716.94617282  
 Sum of electronic and zero-point  
 Energies= -1716.455704  
 Sum of electronic and thermal Energies=  
 -1716.422755

Sum of electronic and thermal  
 Enthalpies= -1716.421811  
 Sum of electronic and thermal Free  
 Energies= -1716.524792

### 8b

|   |             |             |             |
|---|-------------|-------------|-------------|
| C | -1.09469100 | -0.60372600 | 1.32372900  |
| O | -1.33955400 | 0.89567300  | 0.11870500  |
| C | -2.02215800 | 1.95099000  | 0.75258200  |
| O | -0.99138400 | -0.16073000 | 2.46395900  |
| C | -2.28818700 | -1.42550800 | 0.88110200  |
| O | -1.22502800 | 1.22765600  | -2.35349500 |
| C | -0.08657900 | 1.00776000  | -2.97017000 |
| O | 0.89939700  | 0.47621800  | -2.46021000 |
| C | -0.09775900 | 1.48193200  | -4.41143900 |
| H | -3.17877200 | -0.89483500 | 1.22014600  |
| H | -2.25927700 | -2.40771700 | 1.36690700  |
| H | -2.35273600 | -1.55551000 | -0.19988300 |
| H | -0.96908900 | 1.07684000  | -4.93594000 |
| H | 0.82046300  | 1.17912300  | -4.91742000 |
| H | -0.18644000 | 2.57373400  | -4.43716300 |
| H | -1.20628800 | 1.02697700  | -1.29527000 |
| N | 0.20729500  | -1.01241500 | 0.66046700  |
| C | 1.28404700  | -0.22697200 | 0.76350500  |
| C | 0.33409900  | -1.92668200 | -0.50040700 |
| C | 1.53600800  | 0.87241500  | 1.62616200  |
| N | 2.25773800  | -0.59264400 | -0.12276900 |
| C | 1.82256800  | -1.75281700 | -0.91869200 |
| H | -0.30270200 | -1.54849600 | -1.30430900 |
| C | 2.73542100  | 1.52827100  | 1.51197800  |
| H | 0.76941900  | 1.13555800  | 2.33990400  |
| C | 3.43654900  | 0.05448400  | -0.24848700 |
| H | 2.42716500  | -2.62205300 | -0.64314800 |
| H | 1.92399900  | -1.52096700 | -1.97752300 |
| C | 3.71161900  | 1.12502500  | 0.56175400  |
| H | 2.94475900  | 2.37734400  | 2.15542200  |
| H | 4.11536600  | -0.31374100 | -1.00658400 |
| H | -1.82349400 | 1.86900200  | 1.83345200  |
| C | -1.46389100 | 3.30492700  | 0.27420100  |
| H | -0.38203300 | 3.34293900  | 0.44768700  |
| H | -1.93477600 | 4.13720700  | 0.81071300  |

|   |             |             |             |
|---|-------------|-------------|-------------|
| H | -1.64372900 | 3.44411300  | -0.79726600 |
| C | -3.54258300 | 1.89561600  | 0.57546000  |
| C | -4.38581900 | 2.12000700  | 1.67109600  |
| C | -4.12871500 | 1.64752800  | -0.67462900 |
| C | -5.77537100 | 2.10752200  | 1.52866600  |
| H | -3.94648800 | 2.30068500  | 2.65028800  |
| C | -5.51609100 | 1.63251800  | -0.82076000 |
| H | -3.49375600 | 1.46396200  | -1.53607600 |
| C | -6.34614000 | 1.86340100  | 0.27928800  |
| H | -6.40984500 | 2.28094600  | 2.39476400  |
| H | -5.95246000 | 1.43898600  | -1.79819500 |
| H | -7.42709800 | 1.84903100  | 0.16334300  |
| C | -0.00308200 | -3.37575600 | -0.19922000 |
| C | -0.63533400 | -4.15082900 | -1.17701600 |
| C | 0.36301500  | -3.97325400 | 1.01365200  |
| C | -0.89290500 | -5.50428200 | -0.95213200 |
| H | -0.93377900 | -3.69207100 | -2.11710800 |
| C | 0.09893000  | -5.32342100 | 1.24205300  |
| H | 0.83300400  | -3.37341000 | 1.78862800  |
| C | -0.52632600 | -6.09339900 | 0.25832300  |
| H | -1.38767600 | -6.09375000 | -1.71909200 |
| H | 0.37714600  | -5.77327600 | 2.19120300  |
| H | -0.73294700 | -7.14475800 | 0.43821300  |
| C | 5.01816800  | 1.85416700  | 0.46287100  |
| F | 5.78996300  | 1.36848300  | -0.53296400 |
| F | 4.83168600  | 3.17110500  | 0.23706600  |
| F | 5.72286500  | 1.75258000  | 1.61233600  |

SCF: E(RB+HF-LYP) = -1716.94706510  
 Sum of electronic and zero-point  
 Energies= -1716.460356  
 Sum of electronic and thermal Energies=  
 -1716.427306  
 Sum of electronic and thermal  
 Enthalpies= -1716.426362  
 Sum of electronic and thermal Free  
 Energies= -1716.530767

**C2.** The optimized TS structures of N-Acetyl-(R)-CF<sub>3</sub>-PIP Acetate with (R)- and (S)-1-phenylethanol, **7a** and **8b**, respectively, obtained as described above, were transformed into the analogous TS structures of N-Propionyl-(R)-CF<sub>3</sub>-PIP Propionate, **9a** and **10b**, respectively, and re-optimized at B3LYP/6-31G\* level of theory.

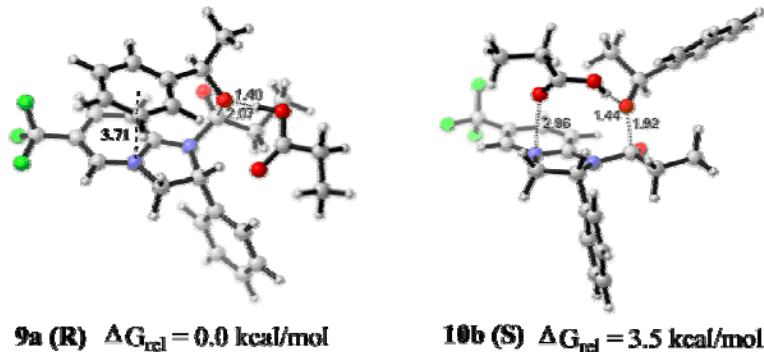

**Figure S-7.** TS of EtCO-CF<sub>3</sub>-PIP propionate and 1-phenylethanol

**9a (R)**

|   |             |             |             |
|---|-------------|-------------|-------------|
| C | 0.88380300  | -0.30262000 | -2.16432000 |
| O | 1.23932400  | 1.44568700  | -1.10704200 |
| C | 0.24892200  | 2.39459000  | -1.35789400 |
| O | 0.16164200  | -0.02011100 | -3.10916500 |
| C | 2.35215000  | -0.65846800 | -2.30811900 |
| O | 3.45626800  | 2.21616200  | -0.30443500 |
| C | 3.83015600  | 1.67002600  | 0.82748500  |
| O | 3.17662300  | 0.83690700  | 1.46241500  |
| C | 5.18438900  | 2.17672600  | 1.30909800  |
| H | 2.87953700  | -0.53784900 | -1.36027400 |
| H | 2.38641300  | -1.72993700 | -2.55695000 |
| H | 5.10018400  | 3.26508400  | 1.42756400  |
| H | 5.90085100  | 2.03087700  | 0.49059700  |
| H | 2.47939400  | 1.87917300  | -0.63234500 |
| N | 0.21977800  | -0.92741700 | -0.97771100 |
| C | -1.10960300 | -0.89971300 | -0.82076500 |
| C | 0.91168300  | -1.13338400 | 0.32431300  |
| C | -2.15456500 | -0.80501400 | -1.77931400 |
| N | -1.45514300 | -1.00529700 | 0.50229000  |
| C | -0.24894100 | -1.04824800 | 1.35558800  |
| H | 1.58892500  | -0.29291300 | 0.48791000  |
| C | -3.45325600 | -0.79184800 | -1.33517200 |
| H | -1.88419200 | -0.72635900 | -2.82082400 |
| C | -2.73174400 | -0.98314900 | 0.94475900  |
| H | -0.29105600 | -1.92239500 | 2.00864700  |
| H | -0.21051400 | -0.13164700 | 1.94796400  |
| C | -3.76202900 | -0.87281300 | 0.04763200  |
| H | -4.26395700 | -0.72281600 | -2.05386600 |
| H | -2.87570700 | -1.04800300 | 2.01548900  |
| C | -0.71975200 | 2.53891600  | -0.17693300 |
| C | -2.09301100 | 2.72497500  | -0.38387800 |
| C | -0.24895100 | 2.49387100  | 1.14435400  |
| C | -2.97731400 | 2.85815200  | 0.69050500  |
| H | -2.47524000 | 2.76001800  | -1.40270100 |
| C | -1.12591200 | 2.63863400  | 2.22211800  |
| H | 0.81006900  | 2.32731900  | 1.32096400  |
| C | -2.49545000 | 2.81560200  | 2.00038700  |
| H | -4.04147900 | 2.98295600  | 0.50503900  |

**10b (S)**

|   |             |             |             |
|---|-------------|-------------|-------------|
| C | -1.01837700 | -0.84723800 | 1.48109400  |
| O | -1.60100200 | 0.41493500  | 0.16229300  |
| C | -2.09813100 | 1.60129500  | 0.73093500  |
| O | -0.98726700 | -0.29062200 | 2.57599600  |
| C | -2.00093800 | -1.96954600 | 1.16871700  |
| O | -1.39766600 | 0.52383000  | -2.32700300 |
| C | -0.22708100 | 0.80327200  | -2.86311000 |
| O | 0.84230100  | 0.79373900  | -2.25495500 |
| C | -0.32809100 | 1.14814100  | -4.34284500 |
| H | -2.10651200 | -2.10363700 | 0.08938800  |
| H | -1.56873600 | -2.89477100 | 1.57322500  |
| H | -0.97865100 | 0.40455600  | -4.81924000 |
| H | -0.87552300 | 2.09802200  | -4.41258700 |
| H | -1.38536400 | 0.46737600  | -1.25594800 |
| N | 0.34999100  | -1.07360800 | 0.82629100  |
| C | 1.33288200  | -0.17870200 | 0.98097700  |
| C | 0.57190000  | -1.88530300 | -0.39963100 |
| C | 1.49442700  | 0.85738100  | 1.94086300  |
| N | 2.31632500  | -0.34147800 | 0.04307000  |
| C | 1.99918300  | -1.46342800 | -0.85438100 |
| H | -0.15622900 | -1.56809200 | -1.15007500 |
| C | 2.60908000  | 1.65442000  | 1.86506700  |
| H | 0.72209000  | 0.97194700  | 2.68665500  |
| C | 3.41120000  | 0.44388300  | -0.04253600 |
| H | 2.72790300  | -2.26383000 | -0.69736600 |
| H | 2.01742000  | -1.11144000 | -1.88446600 |
| C | 3.59299100  | 1.45835300  | 0.86082800  |
| H | 2.74297800  | 2.45417500  | 2.58717900  |
| H | 4.10276400  | 0.22635700  | -0.84595400 |

|   |             |             |             |
|---|-------------|-------------|-------------|
| H | -0.73889400 | 2.61695700  | 3.23886100  |
| H | -3.17793500 | 2.92589800  | 2.83959200  |
| C | 0.85367500  | 3.76422200  | -1.72973900 |
| H | 1.49876300  | 3.65264300  | -2.60795400 |
| H | 1.46050600  | 4.15767800  | -0.90678100 |
| H | 0.07062100  | 4.49645500  | -1.96113800 |
| H | -0.34350100 | 2.05775100  | -2.22918500 |
| C | 1.66823000  | -2.44907000 | 0.40736700  |
| C | 2.87006700  | -2.48582100 | 1.12695300  |
| C | 1.17282600  | -3.63003100 | -0.16028800 |
| C | 3.55776400  | -3.69094300 | 1.28211000  |
| H | 3.26255300  | -1.56470200 | 1.55060000  |
| C | 1.86556300  | -4.83163000 | -0.00870900 |
| H | 0.25270100  | -3.61077200 | -0.73924900 |
| C | 3.05853500  | -4.86525600 | 0.71644700  |
| H | 4.49074000  | -3.70892600 | 1.83917900  |
| H | 1.47541800  | -5.74021000 | -0.45980000 |
| H | 3.59864400  | -5.80094500 | 0.83350400  |
| C | -5.18334500 | -0.78153200 | 0.51793800  |
| F | -5.29650200 | -1.08385500 | 1.82858000  |
| F | -5.98116400 | -1.62381900 | -0.17345200 |
| F | -5.68203200 | 0.46130900  | 0.34164200  |
| C | 5.66963900  | 1.51827300  | 2.59846600  |
| H | 4.95042400  | 1.66742600  | 3.40955200  |
| H | 6.63316400  | 1.93766900  | 2.90852000  |
| H | 5.79309400  | 0.43836800  | 2.46742600  |
| C | 3.02617200  | 0.16158300  | -3.40743700 |
| H | 2.48135600  | 0.06852700  | -4.35099100 |
| H | 4.05452800  | -0.18299500 | -3.55970300 |
| H | 3.05036000  | 1.21659500  | -3.12452300 |

SCF: E(RB+HF-LYP) = -1795.58450359  
Sum of electronic and zero-point  
Energies= -1795.036948  
Sum of electronic and thermal Energies=  
-1795.001259  
Sum of electronic and thermal  
Enthalpies= -1795.000315  
Sum of electronic and thermal Free  
Energies= -1795.109207

|   |             |             |             |
|---|-------------|-------------|-------------|
| H | -1.89521500 | 1.55646700  | 1.81323300  |
| C | -1.36665200 | 2.83559700  | 0.16358300  |
| H | -0.28399500 | 2.72496200  | 0.29082100  |
| H | -1.68921600 | 3.75290400  | 0.67040300  |
| H | -1.57582300 | 2.95217400  | -0.90556800 |
| C | -3.61049100 | 1.76701000  | 0.56154600  |
| C | -4.36615600 | 2.37793300  | 1.57082600  |
| C | -4.26778600 | 1.36110600  | -0.60810500 |
| C | -5.73799000 | 2.58754100  | 1.41953400  |
| H | -3.87260700 | 2.68762700  | 2.49036300  |
| C | -5.63984300 | 1.56659300  | -0.76224700 |
| H | -3.69998700 | 0.88055200  | -1.39861500 |
| C | -6.38101700 | 2.18170700  | 0.24907000  |
| H | -6.30491100 | 3.05958800  | 2.21862400  |
| H | -6.13282600 | 1.24376600  | -1.67652300 |
| H | -7.45002600 | 2.33861400  | 0.12804100  |
| C | 0.48176400  | -3.38778800 | -0.19463500 |
| C | -0.12256400 | -4.17935800 | -1.17633400 |
| C | 1.05437200  | -4.00798100 | 0.92348600  |
| C | -0.15293900 | -5.56934400 | -1.04786000 |
| H | -0.57892700 | -3.70587300 | -2.04270900 |
| C | 1.01803800  | -5.39551100 | 1.05656900  |
| H | 1.50898700  | -3.40154000 | 1.70286000  |
| C | 0.41683100  | -6.18039500 | 0.06927700  |
| H | -0.62924400 | -6.17137300 | -1.81673100 |
| H | 1.45538800  | -5.86415700 | 1.93395200  |
| H | 0.38791000  | -7.26132700 | 0.17466500  |
| C | 4.79891400  | 2.34742200  | 0.79396200  |
| F | 5.63451600  | 1.98417400  | -0.20248300 |
| F | 4.45248500  | 3.63541400  | 0.59304300  |

|   |             |             |             |                                         |                |
|---|-------------|-------------|-------------|-----------------------------------------|----------------|
| F | 5.49749100  | 2.30758900  | 1.95061300  | SCF: E(RB+HF-LYP) =                     | -1795.57744074 |
| C | 1.02459000  | 1.24778100  | -5.04458000 | Sum of electronic and zero-point        |                |
| H | 1.66310200  | 1.98946000  | -4.55604800 | Energies=                               | -1795.029728   |
| H | 0.89706400  | 1.53596200  | -6.09354000 | Sum of electronic and thermal Energies= |                |
| H | 1.55577200  | 0.28997700  | -5.01842900 | -1794.993985                            |                |
| C | -3.36411000 | -1.72106600 | 1.81364900  | Sum of electronic and thermal           |                |
| H | -3.25453500 | -1.55677100 | 2.88921100  | Enthalpies=                             | -1794.993041   |
| H | -4.01707500 | -2.58661100 | 1.65592300  | Sum of electronic and thermal Free      |                |
| H | -3.84556700 | -0.84174800 | 1.38021300  | Energies=                               | -1795.103606   |

**C3.** The geometries of the transition states of (R)- and (S)-1-phenylethanol approaching N-acetyl-(R)-CF<sub>3</sub>-PIP acetate from the  $\alpha$ -face were optimized at B3LYP/6-31G\* level.

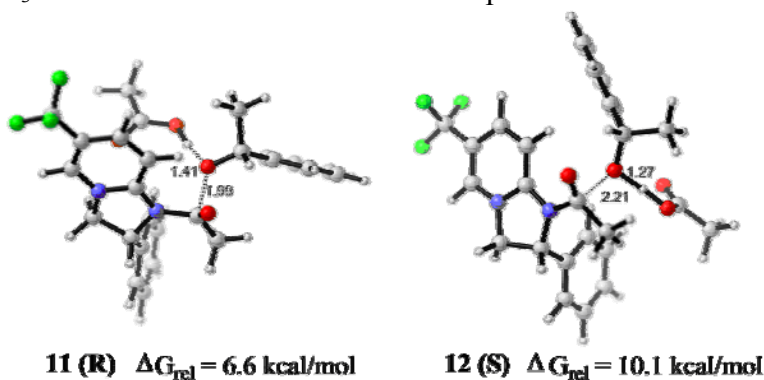

**Figure S-8.** Substrate approaching N-acetyl-(R)-CF<sub>3</sub>-PIP acetate from the  $\alpha$ -face

|               |             |             |             |                                         |                |             |             |
|---------------|-------------|-------------|-------------|-----------------------------------------|----------------|-------------|-------------|
| <b>11 (R)</b> |             |             |             | H                                       | -0.52562000    | 2.58822700  | -2.18789100 |
| C             | 0.88845700  | -0.01791200 | -1.87078400 | C                                       | 0.65377700     | 3.04485200  | -0.46800200 |
| O             | 1.21415200  | -1.01694800 | -0.18264600 | C                                       | 1.05569800     | 4.25145900  | -1.05010800 |
| C             | 1.87615700  | -2.23042900 | -0.43026800 | C                                       | 1.19826100     | 2.66124700  | 0.76487900  |
| O             | 0.56487800  | -0.84048200 | -2.71802800 | C                                       | 1.98582700     | 5.07303700  | -0.41021000 |
| C             | 2.20110300  | 0.72968200  | -1.93279200 | H                                       | 0.64301000     | 4.55099000  | -2.01141800 |
| O             | 0.71526600  | -0.70724700 | 2.23603800  | C                                       | 2.13579900     | 3.47704600  | 1.39626800  |
| C             | -0.41824700 | -0.17232800 | 2.63029200  | H                                       | 0.91332200     | 1.71293200  | 1.20589200  |
| O             | -1.23167900 | 0.38796100  | 1.89549600  | C                                       | 2.52816000     | 4.68582600  | 0.81488100  |
| C             | -0.64214800 | -0.30914900 | 4.12550700  | H                                       | 2.29049800     | 6.00715100  | -0.87396800 |
| H             | 2.95430700  | 0.01416000  | -2.26662000 | H                                       | 2.56513900     | 3.16409200  | 2.34391700  |
| H             | 2.13715300  | 1.52954800  | -2.68327700 | H                                       | 3.25891000     | 5.31801800  | 1.31179900  |
| H             | 2.50392000  | 1.14993500  | -0.97747100 | C                                       | 3.38789100     | -2.14379500 | -0.20443900 |
| H             | 0.24603800  | 0.01988700  | 4.67399900  | C                                       | 4.27439800     | -2.81421200 | -1.05631900 |
| H             | -1.51302900 | 0.27208000  | 4.43332600  | C                                       | 3.91798800     | -1.41840900 | 0.87132900  |
| H             | -0.80142300 | -1.36418000 | 4.37564800  | C                                       | 5.65369800     | -2.77144000 | -0.84045700 |
| H             | 0.85619100  | -0.77824900 | 1.16097500  | H                                       | 3.87879100     | -3.37346300 | -1.90254700 |
| N             | -0.24280800 | 0.74667600  | -1.21434800 | C                                       | 5.29493400     | -1.37366900 | 1.09147400  |
| C             | -1.40949900 | 0.13377700  | -0.99829700 | H                                       | 3.24226200     | -0.88687800 | 1.53488400  |
| C             | -0.42048000 | 2.22514000  | -1.15578300 | C                                       | 6.16943300     | -2.04980000 | 0.23682100  |
| C             | -1.75650300 | -1.23885400 | -1.10964600 | H                                       | 6.32419000     | -3.29603100 | -1.51727300 |
| N             | -2.38277700 | 1.02173700  | -0.63116000 | H                                       | 5.68854400     | -0.80708400 | 1.93252200  |
| C             | -1.78162200 | 2.34738700  | -0.42274900 | H                                       | 7.24251000     | -2.01093700 | 0.40726700  |
| C             | -3.03747800 | -1.61207300 | -0.79618500 | C                                       | 1.27443500     | -3.37166800 | 0.41582300  |
| H             | -1.00534100 | -1.93158600 | -1.45174300 | H                                       | 0.19940000     | -3.46089300 | 0.21781800  |
| C             | -3.63347800 | 0.65281600  | -0.27155100 | H                                       | 1.75167600     | -4.33010800 | 0.18000600  |
| H             | -2.41626000 | 3.13532200  | -0.83325700 | H                                       | 1.40818200     | -3.17529600 | 1.48469000  |
| H             | -1.63907900 | 2.48408700  | 0.65179800  | SCF: E(RB+HF-LYP) =                     | -1716.94405748 |             |             |
| C             | -4.00174000 | -0.66219400 | -0.36122600 | Sum of electronic and zero-point        |                |             |             |
| H             | -3.32463000 | -2.65619800 | -0.87387600 | Energies=                               | -1716.454481   |             |             |
| H             | -4.29587000 | 1.43958400  | 0.06524900  | Sum of electronic and thermal Energies= |                |             |             |
| H             | 1.71564700  | -2.48901800 | -1.49141100 | -1716.421393                            |                |             |             |
| C             | -5.39391200 | -1.09947300 | -0.01798700 | Sum of electronic and thermal           |                |             |             |
| F             | -6.02389800 | -1.62382800 | -1.09332900 | Enthalpies=                             | -1716.420449   |             |             |
| F             | -5.38844100 | -2.05641000 | 0.93309400  | Sum of electronic and thermal Free      |                |             |             |
| F             | -6.14607700 | -0.07225600 | 0.43354700  | Energies=                               | -1716.523277   |             |             |



**12 (S)**

|   |             |             |             |                                         |                |             |             |
|---|-------------|-------------|-------------|-----------------------------------------|----------------|-------------|-------------|
| C | 0.97758200  | -0.19313800 | 2.49901400  | C                                       | -2.10920500    | 4.29999200  | -0.21583000 |
| O | 1.38021000  | 1.19955100  | 0.83692700  | H                                       | -1.23754700    | 4.00973300  | 1.73480100  |
| C | 0.98671700  | 2.50328300  | 1.18075600  | C                                       | -1.99386100    | 4.04386000  | -1.58347800 |
| O | 0.27738500  | 0.47427700  | 3.23646400  | H                                       | -0.80786000    | 3.10384500  | -3.12001100 |
| C | 2.43381400  | -0.50798200 | 2.72631800  | H                                       | -2.94382600    | 4.88615700  | 0.16284300  |
| O | 3.68448700  | 1.01737900  | 0.08547400  | H                                       | -2.73909100    | 4.42656900  | -2.27679300 |
| C | 3.90273200  | 1.15299200  | -1.19638300 | C                                       | 2.17366600     | 3.48185000  | 1.29329200  |
| O | 3.03924900  | 1.34274900  | -2.05703200 | H                                       | 2.91988200     | 3.09406000  | 1.99520400  |
| C | 5.37473500  | 1.02600800  | -1.57014300 | H                                       | 2.65859100     | 3.62344900  | 0.32245400  |
| H | 2.89076400  | 0.37063900  | 3.18211500  | H                                       | 1.83103200     | 4.45985700  | 1.65143900  |
| H | 2.52147500  | -1.34322300 | 3.43647000  | H                                       | 0.51253700     | 2.46177900  | 2.18045300  |
| H | 2.96782100  | -0.74554500 | 1.80622100  | C                                       | -4.79206400    | -1.00291600 | -0.76178100 |
| H | 5.71237000  | 0.00015600  | -1.37998900 | F                                       | -5.76760100    | -0.62089000 | 0.08862700  |
| H | 5.52202000  | 1.26659600  | -2.62495800 | F                                       | -4.82254000    | -0.15415600 | -1.80635900 |
| H | 5.98403000  | 1.68696400  | -0.94519100 | F                                       | -5.10398200    | -2.23564400 | -1.21821500 |
| H | 2.56848300  | 1.13552400  | 0.38480000  | H                                       | 1.19293000     | -2.99417700 | -2.13422400 |
| N | 0.27802800  | -1.16429100 | 1.61619300  | C                                       | 1.66594400     | -2.62781200 | 0.06306600  |
| C | -0.95533900 | -0.93769500 | 1.14525200  | C                                       | 2.36089400     | -3.83350100 | -0.11817300 |
| C | 0.72798700  | -2.53398800 | 1.25864000  | C                                       | 1.78084500     | -1.61210900 | -0.88909600 |
| C | -1.70353700 | 0.25955500  | 1.06670900  | C                                       | 3.14274900     | -4.03150500 | -1.25373700 |
| N | -1.50773400 | -2.09027200 | 0.65178600  | H                                       | 2.29232300     | -4.61996100 | 0.63237800  |
| C | -0.63045000 | -3.23395800 | 0.96765700  | C                                       | 2.56896000     | -1.81374200 | -2.02714400 |
| C | -2.92578700 | 0.22265500  | 0.44199100  | H                                       | 1.30492600     | -0.64851400 | -0.73173100 |
| H | -1.28916300 | 1.16985100  | 1.46499100  | C                                       | 3.24123000     | -3.02090100 | -2.21452100 |
| C | -2.71690300 | -2.13835500 | 0.04142100  | H                                       | 3.68083800     | -4.96676500 | -1.38333200 |
| H | -1.03728700 | -3.75065800 | 1.84410500  | H                                       | 2.67354400     | -0.99853100 | -2.73510700 |
| H | -0.57076100 | -3.92057400 | 0.12314900  | H                                       | 3.85533900     | -3.17068200 | -3.09845700 |
| C | -3.45037500 | -0.98797000 | -0.08528400 | SCF: E(RB+HF-LYP) =                     | -1716.93647035 |             |             |
| H | -3.48750700 | 1.14481300  | 0.33002700  | Sum of electronic and zero-point        |                |             |             |
| H | -3.04337600 | -3.10380600 | -0.32310100 | Energies=                               | -1716.448851   |             |             |
| C | -0.06029500 | 3.04892000  | 0.20566100  | Sum of electronic and thermal Energies= | -1716.415718   |             |             |
| C | 0.05014300  | 2.80038200  | -1.17076700 | Sum of electronic and thermal           |                |             |             |
| C | -1.14554700 | 3.80530500  | 0.66856000  | Enthalpies=                             | -1716.414774   |             |             |
| C | -0.90864100 | 3.29839000  | -2.05457900 | Sum of electronic and thermal Free      |                |             |             |
| H | 0.89593700  | 2.22322300  | -1.53853100 | Energies=                               | -1716.517683   |             |             |

**(d) Single-point calculations using other computational methods and solvation correction**

TS structures **7a**, **8b**, **9a**, and **10b** optimized at B3LYP/6-31G\* level of theory as described above were subjected to single-point energy calculations using other computational methods in gas phase (Table S-2). Subsequently, these results were subjected to solvent correction using the CPCM<sup>3</sup> polarizable conductor calculation model as implemented in Gaussian 03 (Table S-3). Chloroform was specified as the solvent. The UFF atomic radii were used. Hydrogens have individual spheres.

**Table S-2.** Free energies of **7a**, **8b**, **9a**, and **10b** in gas phase

| Method                                        | G <sub>298</sub> of <b>7a</b><br>(a.u.) | G <sub>298</sub> of <b>8b</b><br>(a.u.) | ΔG <sub>rel</sub> ( <b>8b-7a</b> )<br>(kcal/mol) | G <sub>298</sub> of <b>9a</b><br>(a.u.) | G <sub>298</sub> of <b>10b</b><br>(a.u.) | ΔG <sub>rel</sub> ( <b>10b-9a</b> )<br>(kcal/mol) |
|-----------------------------------------------|-----------------------------------------|-----------------------------------------|--------------------------------------------------|-----------------------------------------|------------------------------------------|---------------------------------------------------|
| B3LYP/6-31G*                                  | -1716.533805                            | -1716.530767                            | 1.9                                              | -1795.109244                            | -1795.103606                             | 3.5                                               |
| MP2/6-31G*//<br>B3LYP/6-31G* <sup>a</sup>     | -1711.434669                            | -1711.427432                            | 4.5                                              | -1789.716955                            | -1789.707359                             | 6.0                                               |
| SCS-MP2/6-31G*//<br>B3LYP/6-31G* <sup>a</sup> | -1711.254999                            | -1711.249121                            | 3.7                                              | -1789.534322                            | -1789.525727                             | 5.4                                               |
| M05-2X/6-31G*//<br>B3LYP/6-31G* <sup>a</sup>  | -1716.368694                            | -1716.364145                            | 2.9                                              | -1794.932492                            | -1794.924754                             | 4.9                                               |

<sup>a</sup> Thermal correction was calculated at B3LYP/6-31G\* level.

**Table S-3.** Free energies of **7a**, **8b**, **9a**, and **10b** in chloroform

| Method                                         | $G_{298}$ of <b>7a</b><br>(a.u.) | $G_{298}$ of <b>8b</b><br>(a.u.) | $\Delta G_{\text{rel}}$ ( <b>8b</b> - <b>7a</b> )<br>(kcal/mol) | $G_{298}$ of <b>9a</b><br>(a.u.) | $G_{298}$ of <b>10b</b><br>(a.u.) | $\Delta G_{\text{rel}}$ ( <b>10b</b> - <b>9a</b> )<br>(kcal/mol) |
|------------------------------------------------|----------------------------------|----------------------------------|-----------------------------------------------------------------|----------------------------------|-----------------------------------|------------------------------------------------------------------|
| B3LYP/6-31G*                                   | -1716.511641                     | -1716.509035                     | 1.6                                                             | -1795.081571                     | -1795.077051                      | 2.8                                                              |
| MP2/6-31G**//<br>B3LYP/6-31G* <sup>a</sup>     | -1711.451895                     | -1711.443409                     | 5.3                                                             | -1789.732726                     | -1789.722749                      | 6.3                                                              |
| SCS-MP2/6-31G**//<br>B3LYP/6-31G* <sup>a</sup> | -1711.272472                     | -1711.265275                     | 4.5                                                             | -1789.550318                     | -1789.541284                      | 5.7                                                              |
| M05-2X/6-31G**//<br>B3LYP/6-31G* <sup>a</sup>  | -1716.348901                     | -1716.344598                     | 2.7                                                             | -1794.907011                     | -1794.900313                      | 4.2                                                              |

<sup>a</sup> Thermal correction was calculated at B3LYP/6-31G\* level.

**(e) Interaction energies of benzene and N-acetyl-6-CF<sub>3</sub>-DHIP<sup>+</sup>**

N-acetyl-6-trifluoromethyl-DHIP cation lacking the phenyl group at C2 was used instead of the analogous CF<sub>3</sub>-PIP derivative to simplify the calculation. Geometries of the complexes of benzene and this cation are shown in Figure S-9. Intermolecular distances are the distance between the centers of benzene and pyridinium ring (center-center), between the pyridinium nitrogen and the center of benzene (N-center), and between the midpoint of the N-C bond and the center of benzene (edge-center).

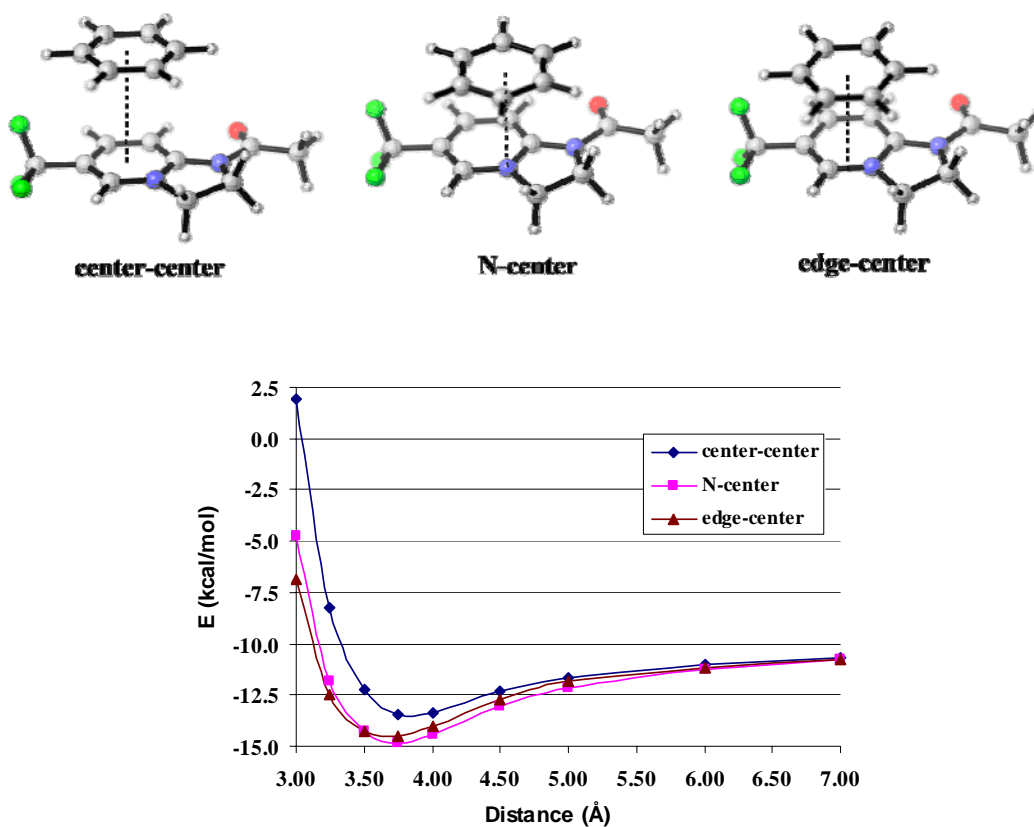**Figure S-9.** Interaction energies of benzene and N-acetyl-6-CF<sub>3</sub>-DHIP<sup>+</sup>

### (f) Electrostatic potential of 7a

The electrostatic potential of **7a** was calculated in Gaussian 03.

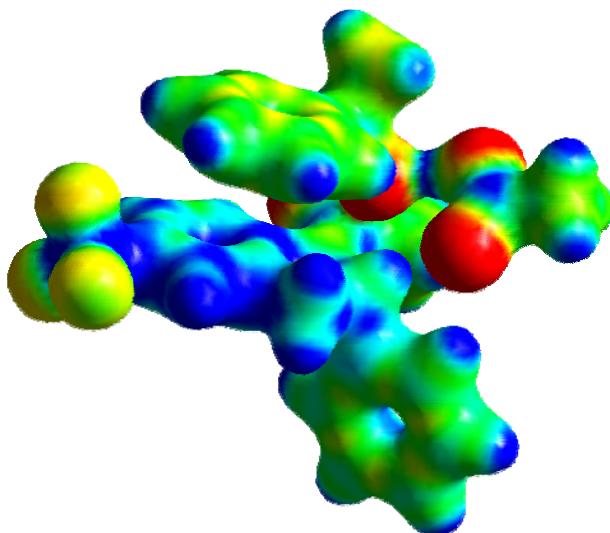

**Figure S-10.** Electrostatic potential of **7a** (R)

### REFERENCES

<sup>1</sup> Gaussian 03, Revision D.01: Frisch, M. J.; Trucks, G. W.; Schlegel, H. B.; Scuseria, G. E.; Robb, M. A.; Cheeseman, J. R.; Montgomery Jr., J. A.; Vreven, T.; Kudin, K. N.; Burant, J. C.; Millam, J. M.; Iyengar, S. S.; Tomasi, J.; Barone, V.; Mennucci, B.; Cossi, M.; Scalmani, G.; Rega, N.; Petersson, G. A.; Nakatsuji, H.; Hada, M.; Ehara, M.; Toyota, K.; Fukuda, R.; Hasegawa, J.; Ishida, M.; Nakajima, T.; Honda, Y.; Kitao, O.; Nakai, H.; Klene, M.; Li, X.; Knox, J. E.; Hratchian, H. P.; Cross, J. B.; Bakken, V.; Adamo, C.; Jaramillo, J.; Gomperts, R.; Stratmann, R. E.; Yazyev, O.; Austin, A. J.; Cammi, R.; Pomelli, C.; Ochterski, J. W.; Ayala, P. Y.; Morokuma, K.; Voth, G. A.; Salvador, P.; Dannenberg, J. J.; Zakrzewski, V. G.; Dapprich, S.; Daniels, A. D.; Strain, M. C.; Farkas, O.; Malick, D. K.; Rabuck, A. D.; Raghavachari, K.; Foresman, J. B.; Ortiz, J. V.; Cui, Q.; Baboul, A. G.; Clifford, S.; Cioslowski, J.; Stefanov, B. B.; Liu, G.; Liashenko, A.; Piskorz, P.; Komaromi, I.; Martin, R. L.; Fox, D. J.; Keith, T.; Al-Laham, M. A.; Peng, C. Y.; Nanayakkara, A.; Challacombe, M.; Gill, P. M. W.; Johnson, B.; Chen, W.; Wong, M. W.; Gonzalez, C.; Pople, J. A., Gaussian, Inc., Wallingford CT, 2004.

<sup>2</sup> CYLview, version 1.0b, Legault, C. Y., UCLA, 2007.

<sup>3</sup> (a) Barone, V.; Cossi, M. *J. Phys. Chem. A* **1998**, *102*, 1995. (b) Cossi, M.; Rega, N.; Scalmani, G.; Barone, V. *J. Comp. Chem.* **2003**, *24*, 669.
