# Supplementary material
Source: PubMed Central journal article supplement (PMC2663394)
Supplement: NIHMS93024-supplement-3_si_003.pdf [file NIHMS93024-supplement-3_si_003.pdf]

# ORIGIN OF ENANTIOSELECTIVITY IN CF<sub>3</sub>-PIP-CATALYZED KINETIC RESOLUTION OF SECONDARY BENZYLIC ALCOHOLS

Ximin Li,<sup>1</sup> Peng Liu,<sup>2</sup> K. N. Houk\*<sup>2</sup> and Vladimir B. Birman\*<sup>1</sup>

*A contribution from: (1) Department of Chemistry, Washington University, One Brookings Drive, St. Louis, Missouri 63130 and (2) Department of Chemistry and Biochemistry, University of California, Los Angeles, California 90095-1569*

## SUPPORTING INFORMATION

|      |                                                                                                                                                                                                                                                                |      |
|------|----------------------------------------------------------------------------------------------------------------------------------------------------------------------------------------------------------------------------------------------------------------|------|
| I.   | General.....                                                                                                                                                                                                                                                   | S-1  |
| II.  | Kinetic resolution of 1-phenylethanol catalyzed by (R)-CF <sub>3</sub> -PIP <b>1</b> .....                                                                                                                                                                     | S-2  |
| III. | Preparation and X-ray structure of N-Acetyl-(R)-CF <sub>3</sub> -PIP <sup>+</sup> SbF <sub>6</sub> <sup>-</sup> <b>5a</b> .....                                                                                                                                | S-2  |
| IV.  | Details of the computational study.....                                                                                                                                                                                                                        | S-3  |
|      | (a) Geometry of N-acetyl-(R)-CF <sub>3</sub> -PIP <sup>+</sup> ( <b>5</b> ).....                                                                                                                                                                               | S-3  |
|      | (b) Conformational search on the transition state of a model system, N-Acetyl-DHIP <sup>+</sup> AcO <sup>-</sup> , with (R)- and (S)-1-phenylethanol, at HF/3-21G level of theory.....                                                                         | S-6  |
|      | (c) Transition state geometries of N-Acetyl-(R)-CF <sub>3</sub> -PIP <sup>+</sup> AcO <sup>-</sup> and N-Propionyl-(R)-CF <sub>3</sub> -PIP <sup>+</sup> EtCO <sub>2</sub> <sup>-</sup> with (R)- and (S)-1-phenylethanol at B3LYP/6-31G* level of theory..... | S-14 |
|      | (d) Comparison of performance of theoretical methods on a model system using DHIP as as a surrogate for CF <sub>3</sub> -PIP.....                                                                                                                              | S-20 |
|      | (e) Single-point calculations on TS structures <b>7a</b> , <b>8b</b> , <b>9a</b> , and <b>10b</b> using additional computational methods and solvation correction.....                                                                                         | S-28 |
|      | (f) Interaction energies of benzene and N-acetyl-6-CF <sub>3</sub> -DHIP <sup>+</sup> .....                                                                                                                                                                    | S-29 |
|      | (g) Electrostatic potential of <b>7a</b> .....                                                                                                                                                                                                                 | S-30 |

### I. General.

All reagents were obtained from Sigma-Aldrich and were used as received unless specified otherwise. Chloroform-d was distilled from anhydrous K<sub>2</sub>CO<sub>3</sub>. N,N-Diisopropylethylamine and dichloromethane were distilled from CaH<sub>2</sub>. Preparation of (R)-CF<sub>3</sub>-PIP and other experimental details have been previously described.<sup>4a</sup>

## II. Kinetic resolution of 1-phenylethanol catalyzed by (R)-CF<sub>3</sub>-PIP **1**<sup>1</sup>

Both experiments described below were performed in duplicate. A one-dram vial was charged with 0.25 mmol of racemic 1-phenylethanol, 100 mg of Na<sub>2</sub>SO<sub>4</sub>, 1.00 mL of the stock solution of the catalyst (0.010 M of **1** and 0.188 M of *i*-Pr<sub>2</sub>NEt in CDCl<sub>3</sub>) and a stir bar, closed with a rubber septum and stirred at room temperature for 15 minutes. Acetic or propionic anhydride (0.188 mmol) was added via syringe through the septum. The reactions were monitored by periodically withdrawing aliquots and checking them by <sup>1</sup>H NMR. The reactions were stopped by quenching with methanol after reaching ca.50% conversion by NMR. The workup and HPLC analysis followed the previously described standard procedure.<sup>4a</sup>

**Table S-1. Enantioselectivity data**

| Entry | Anhydride             | t(h) | # | ee <sub>PR</sub><br>% | ee <sub>SM</sub><br>% | C <sub>HPLC</sub><br>% | s    | C <sub>AVG</sub><br>% | s <sub>AVG</sub> | ΔG <sub>rel</sub> <sup>a</sup><br>(kcal/mol) |
|-------|-----------------------|------|---|-----------------------|-----------------------|------------------------|------|-----------------------|------------------|----------------------------------------------|
| 1     | (MeCO) <sub>2</sub> O | 4.0  | 1 | 71.8                  | 66.1                  | 47.9                   | 12.0 | 48                    | 12               | 1.5                                          |
|       |                       |      | 2 | 72.9                  | 67.6                  | 48.1                   | 12.8 |                       |                  |                                              |
| 2     | (EtCO) <sub>2</sub> O | 2.3  | 1 | 85.8                  | 66.8                  | 43.8                   | 26.1 | 44                    | 26               | 1.9                                          |
|       |                       |      | 2 | 86.0                  | 66.4                  | 43.5                   | 26.5 |                       |                  |                                              |

$$^a \Delta G_{\text{rel}} \text{ (kcal/mol)} = RT \ln (k_R/k_S) = 1.987 \times 10^{-3} \text{ (kcal} \cdot \text{K}^{-1} \cdot \text{mol}^{-1}) \times 298 \text{ (K)} \times \ln s_{\text{AVG}}$$

## III. (a) Preparation of N-acetyl-(R)-CF<sub>3</sub>PIP hexafluoroantimonate **5a**

Acetyl chloride (10 μL, 0.14 mmol) was added via syringe to a bright-yellow solution of (R)-CF<sub>3</sub>-PIP **1** (28.2 mg, 0.107 mmol) in CH<sub>2</sub>Cl<sub>2</sub> (1 mL). The solution immediately became colorless. After 5 minutes, the solvent and the excess acetyl chloride were rotary evaporated. A solution of AgSbF<sub>6</sub> (37 mg) in CH<sub>3</sub>CN (~ 0.5 mL) was then added to the residue, resulting in the formation of a grainy white precipitate. After 35 minutes, the precipitated AgCl was filtered off. The filtrate was left at room temperature for several days to allow slow crystallization. One of the colorless crystals of **5a** thus obtained was used in the X-ray crystallography analysis producing the structure presented below. Additional details may be found in the accompanying .cif file.

<sup>1</sup> The 0.25 M substrate concentration used in the present study was previously shown to give the highest selectivity (Ref. 4c)

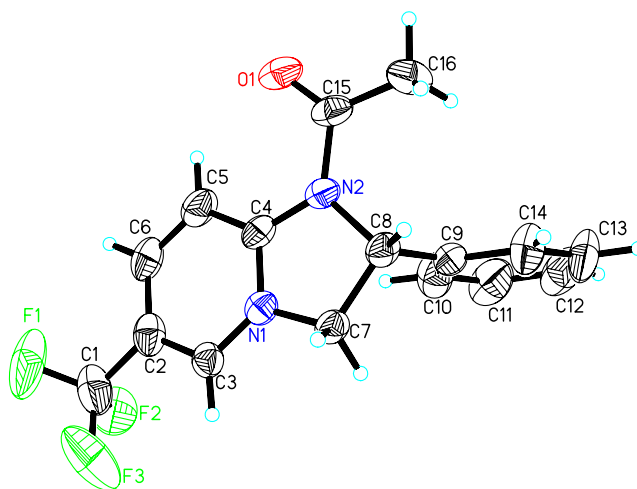

**Figure S-1.** Projection view of **5a** with 50% thermal ellipsoids. Anion not shown

#### IV. Details of the computational study.

All geometry optimizations and frequency calculations were performed in Gaussian 03.<sup>1</sup> Figures for the transition state structures are prepared with CYLview.<sup>2</sup> The Cartesian coordinates (Å), total SCF energies, enthalpies at 298K, and Gibbs free energies at 298K for the optimized structures are given below.

##### (a) Geometry of N-acetyl-(R)-CF<sub>3</sub>-PIP<sup>+</sup> (**5**)

**A1.** Geometry of N-acetyl-(R)-CF<sub>3</sub>-PIP<sup>+</sup> (**5**) was optimized at the B3LYP/6-31G\* level. The global minimum (**5'**) was found to be in a good agreement with the X-ray structure **5a** shown above. Optimization of the conformer with the acetyl group rotated *ca.* 180° led to structure **5''**, which was 4.7 kcal/mol higher in energy.

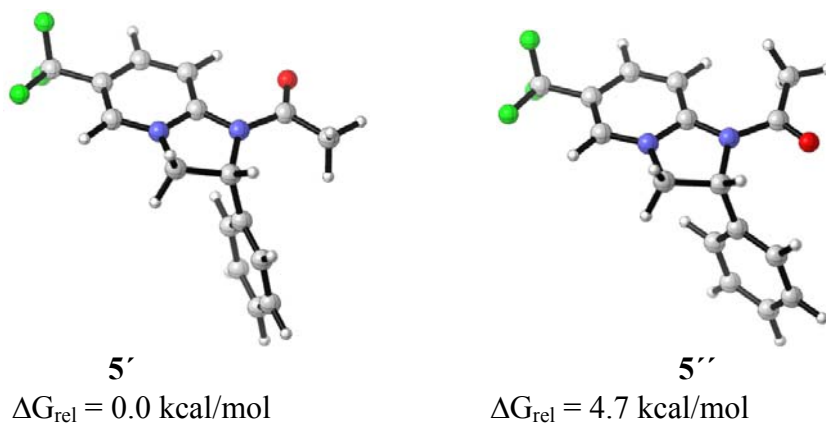

**Figure S-2.** Geometry of N-acetyl-(R)-CF<sub>3</sub>-PIP<sup>+</sup> **5a** and **5b**

|            |             |             |             |                                         |             |             |             |
|------------|-------------|-------------|-------------|-----------------------------------------|-------------|-------------|-------------|
| <b>5'</b>  |             |             |             | H                                       | -2.19553900 | 0.64395300  | -1.97997800 |
| C          | -1.64244600 | 2.46956000  | 0.13436900  | C                                       | -2.64785100 | -0.62611700 | -0.30960000 |
| O          | -1.02642000 | 3.22993000  | 0.84702800  | C                                       | -3.81956900 | -1.08804400 | -0.92267700 |
| C          | -3.06126300 | 2.68974200  | -0.31973900 | C                                       | -2.37827500 | -0.98401500 | 1.01841400  |
| H          | -3.10558100 | 2.82435600  | -1.40734200 | C                                       | -4.70758200 | -1.90414000 | -0.22070000 |
| H          | -3.70746700 | 1.84743000  | -0.05530900 | H                                       | -4.04242800 | -0.80986300 | -1.95065100 |
| H          | -3.42502000 | 3.59720600  | 0.16266800  | C                                       | -3.27021700 | -1.79532100 | 1.71973300  |
| N          | -1.00105700 | 1.28684700  | -0.35721900 | H                                       | -1.48438400 | -0.62170000 | 1.52038700  |
| C          | 0.31069600  | 0.98115300  | -0.11686200 | C                                       | -4.43372500 | -2.25853600 | 1.10111300  |
| C          | -1.67200600 | 0.19772800  | -1.13195400 | H                                       | -5.61455100 | -2.25400000 | -0.70421300 |
| C          | 1.27611000  | 1.61520500  | 0.68753700  | H                                       | -3.05805100 | -2.06212900 | 2.75065300  |
| N          | 0.66021500  | -0.13975300 | -0.81022800 | H                                       | -5.12711600 | -2.88805200 | 1.65036600  |
| C          | -0.45648800 | -0.61718500 | -1.65617000 |                                         |             |             |             |
| C          | 2.54201000  | 1.06148900  | 0.74421800  | SCF Done: E(RB+HF-LYP) = -1102.18571549 |             |             |             |
| H          | 1.00300900  | 2.50463500  | 1.23487100  | Sum of electronic and zero-point        |             |             |             |
| C          | 1.89574900  | -0.69169100 | -0.75805900 | Energies= -1101.907378                  |             |             |             |
| H          | -0.21948500 | -0.39754800 | -2.70122900 | Sum of electronic and thermal           |             |             |             |
| H          | -0.59299400 | -1.69139900 | -1.52600500 | Energies= -1101.888783                  |             |             |             |
| C          | 2.86448700  | -0.10686800 | 0.02128900  | Sum of electronic and thermal           |             |             |             |
| H          | 3.30106600  | 1.53247700  | 1.36158300  | Enthalpies= -1101.887839                |             |             |             |
| H          | 2.06034900  | -1.58403300 | -1.34923900 | Sum of electronic and thermal           |             |             |             |
| C          | 4.25166800  | -0.70449600 | 0.10885800  | Free Energies= -1101.957194             |             |             |             |
| F          | 4.52374100  | -1.06836600 | 1.37228100  |                                         |             |             |             |
| F          | 4.35931100  | -1.78771200 | -0.68141700 | F                                       | -5.16095700 | 0.26585800  | 0.26914800  |
| F          | 5.17224200  | 0.19594300  | -0.26967300 | H                                       | 2.19820000  | 0.66946700  | 1.95679400  |
|            |             |             |             | C                                       | 2.65025200  | -0.68402500 | 0.35859100  |
| <b>5''</b> |             |             |             | C                                       | 4.01216300  | -0.63315900 | 0.67447100  |
| C          | 1.83022300  | 2.38703400  | -0.01957100 | C                                       | 2.21503300  | -1.52928000 | -0.67315500 |
| O          | 2.93855900  | 2.43372900  | 0.45807500  | C                                       | 4.92635300  | -1.42324700 | -0.02346500 |
| C          | 1.26048900  | 3.45779900  | -0.91489200 | H                                       | 4.35938300  | 0.03260000  | 1.45928300  |
| H          | 1.04697500  | 3.06716500  | -1.91610100 | C                                       | 3.12918300  | -2.31410000 | -1.37337000 |
| H          | 0.34643400  | 3.89584700  | -0.49966400 | H                                       | 1.16133300  | -1.58181600 | -0.94263800 |
| H          | 2.01628700  | 4.23927700  | -0.99975500 | C                                       | 4.48695700  | -2.26339200 | -1.04691600 |
| N          | 1.03057600  | 1.23846000  | 0.30340600  | H                                       | 5.98069800  | -1.37823000 | 0.23159400  |
| C          | -0.27787300 | 0.95374300  | 0.06138900  | H                                       | 2.78351600  | -2.96535000 | -2.17060800 |
| C          | 1.67274600  | 0.16495600  | 1.14666900  | H                                       | 5.19860100  | -2.87724700 | -1.59080100 |
| C          | -1.23016800 | 1.53498800  | -0.80006300 |                                         |             |             |             |
| N          | -0.66554600 | -0.12061300 | 0.81555100  | SCF Done: E(RB+HF-LYP) = -1102.17833646 |             |             |             |
| C          | 0.43757300  | -0.59418600 | 1.68599300  | Sum of electronic and zero-point        |             |             |             |
| C          | -2.50669300 | 1.00773500  | -0.83670800 | Energies= -1101.899847                  |             |             |             |
| H          | -0.96537200 | 2.36704100  | -1.43353500 | Sum of electronic and thermal           |             |             |             |
| C          | -1.91144300 | -0.64851500 | 0.78412700  | Energies= -1101.881367                  |             |             |             |
| H          | 0.19820300  | -0.33373800 | 2.72088600  | Sum of electronic and thermal           |             |             |             |
| H          | 0.54250800  | -1.67592000 | 1.59336600  | Enthalpies= -1101.880423                |             |             |             |
| C          | -2.86452700 | -0.09807000 | -0.03756100 | Sum of electronic and thermal           |             |             |             |
| H          | -3.24431400 | 1.44607700  | -1.50218200 | Free Energies= -1101.949708             |             |             |             |
| H          | -2.09671000 | -1.50110500 | 1.42619100  |                                         |             |             |             |
| C          | -4.26545900 | -0.66569600 | -0.09495100 |                                         |             |             |             |
| F          | -4.55924400 | -1.05439600 | -1.34627700 |                                         |             |             |             |
| F          | -4.38849700 | -1.72416700 | 0.72450100  |                                         |             |             |             |

**A2.** To verify that the same trend is observed in the transition state, a simplified system was employed, using the unsubstituted heterocyclic core—2,3-dihydroimidazo[1,2-a]pyridine (DHIP)—instead of CF<sub>3</sub>-PIP and methanol instead of 1-phenylethanol. Transition structures for the model reaction of the two conformers of N-acetyl-DHIP acetate with the acetyl group oriented analogously to **5'** and **5''** were optimized at the B3LYP/6-31G\* level (Figure S-3). Transition state model **TS<sub>model-5''</sub>** was conformed to be less favorable by 4.2 kcal/mol.

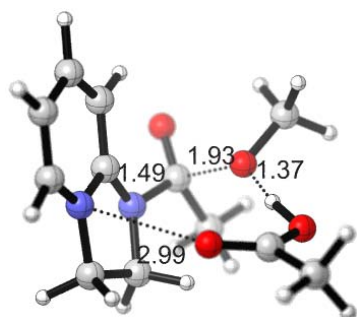

**TS<sub>model-5'</sub>**

$\Delta G_{\text{rel}} = 0.0$  kcal/mol

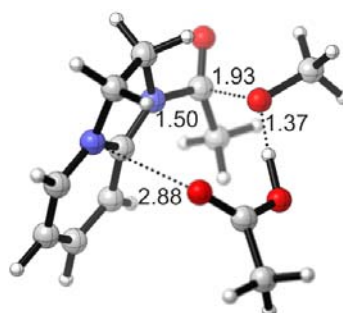

**TS<sub>model-5''</sub>**

$\Delta G_{\text{rel}} = 4.2$  kcal/mol

**Figure S-3. TS of N-acetyl-DHIP acetate with methanol 5c and 5d**

**TS<sub>model-5'</sub>**

|   |             |             |             |
|---|-------------|-------------|-------------|
| C | 0.46901700  | -2.19472800 | -0.38905100 |
| O | -0.89114700 | -1.42828200 | 0.74166600  |
| C | -1.15813900 | -2.24091200 | 1.85063300  |
| O | 1.29188700  | -2.75165900 | 0.33597600  |
| C | -0.42670200 | -2.98730400 | -1.32715700 |
| O | -2.82542000 | 0.07323300  | 0.47668500  |
| C | -2.57708700 | 1.33002800  | 0.20940400  |
| O | -1.48575300 | 1.78444400  | -0.14286000 |
| C | -3.79838000 | 2.22076500  | 0.37287300  |
| H | -0.79597400 | -3.84807200 | -0.76680800 |
| H | 0.16739700  | -3.36232300 | -2.17156800 |
| H | -1.28062900 | -2.42197200 | -1.70345100 |
| H | -3.58101600 | 3.23285800  | 0.02637100  |
| H | -4.09115300 | 2.25146300  | 1.42847400  |
| H | -4.64583800 | 1.80591000  | -0.18242800 |
| H | -1.92637000 | -0.56222200 | 0.52788400  |
| H | -1.28731500 | -1.63442500 | 2.76285600  |
| H | -0.31007500 | -2.92142300 | 2.01998900  |
| H | -2.07053200 | -2.85279400 | 1.72837200  |
| N | 0.84679400  | -0.85985500 | -0.93935600 |
| C | 1.47112700  | 0.04611400  | -0.16678300 |
| C | 0.07522100  | -0.16646800 | -1.98834900 |
| C | 2.14890400  | -0.11409400 | 1.06512100  |

|   |             |             |             |
|---|-------------|-------------|-------------|
| N | 1.40697300  | 1.29125900  | -0.72124900 |
| C | 0.67420500  | 1.25248600  | -2.00190500 |
| H | 0.19222600  | -0.67275100 | -2.94916200 |
| H | -0.97918400 | -0.13177200 | -1.70921300 |
| C | 2.69502100  | 1.00331400  | 1.65527200  |
| H | 2.19372400  | -1.10896700 | 1.48402900  |
| C | 1.93498400  | 2.39474600  | -0.13887000 |
| H | 1.38572600  | 1.40751600  | -2.82014600 |
| H | -0.09580600 | 2.02248900  | -1.99854000 |
| C | 2.59506700  | 2.28323200  | 1.05716600  |
| H | 3.20731600  | 0.90012500  | 2.60738600  |
| H | 1.78955200  | 3.32804100  | -0.66935500 |
| H | 3.01561500  | 3.16353900  | 1.52767900  |

SCF Done: E(RB+HF-LYP) = -878.492805024  
 Sum of electronic and zero-point  
 Energies= -878.198201  
 Sum of electronic and thermal  
 Energies= -878.179204  
 Sum of electronic and thermal  
 Enthalpies= -878.178260  
 Sum of electronic and thermal  
 Free Energies= -878.247399

**TS<sub>model-5''</sub>**

|   |             |             |             |
|---|-------------|-------------|-------------|
| C | 1.91417100  | 1.13118700  | -0.55352600 |
| O | 2.10456000  | -0.58570400 | 0.30207000  |
| C | 3.45215900  | -0.94320600 | 0.43798300  |
| O | 2.80724500  | 1.86233200  | -0.14410900 |
| C | 1.86089300  | 0.62999900  | -1.98545500 |
| O | 0.68445400  | -2.49367300 | -0.35216800 |
| C | -0.50332300 | -2.54311100 | 0.19806100  |
| O | -0.99817000 | -1.67680000 | 0.92147600  |
| C | -1.25655000 | -3.81931700 | -0.14546400 |
| H | 2.87372400  | 0.31313100  | -2.24224700 |
| H | 1.59059500  | 1.44974900  | -2.66511900 |
| H | 1.18651900  | -0.21738600 | -2.12127600 |
| H | -2.27642000 | -3.77504400 | 0.24130400  |
| H | -0.73776900 | -4.68022700 | 0.29109800  |
| H | -1.27070100 | -3.97070200 | -1.22984000 |
| H | 1.28182800  | -1.62345100 | -0.03504100 |
| H | 3.62845400  | -1.46418800 | 1.39360100  |
| H | 4.07324100  | -0.03418400 | 0.43259500  |
| H | 3.80465200  | -1.60621200 | -0.37269600 |
| N | 0.58380600  | 1.32999200  | 0.11974200  |
| C | -0.67502700 | 1.15168200  | -0.27881500 |
| C | 0.64100500  | 1.57025900  | 1.57305900  |
| C | -1.25228200 | 1.03172200  | -1.57095100 |

|   |             |            |             |
|---|-------------|------------|-------------|
| N | -1.53065300 | 1.15212600 | 0.79793800  |
| C | -0.74950300 | 1.13153800 | 2.05503200  |
| H | 1.44249900  | 0.95993600 | 1.98413400  |
| H | 0.84561500  | 2.62891600 | 1.76255500  |
| C | -2.61627700 | 0.88566500 | -1.67898100 |
| H | -0.62108900 | 1.06547900 | -2.44572600 |
| C | -2.86689500 | 0.97703700 | 0.69323700  |
| H | -0.75279600 | 0.09915800 | 2.41180000  |
| H | -1.19486200 | 1.80800600 | 2.78753300  |
| C | -3.45373500 | 0.85369900 | -0.53932900 |
| H | -3.05781100 | 0.79924600 | -2.66760800 |
| H | -3.41428900 | 0.95045500 | 1.62821400  |
| H | -4.52599700 | 0.73033400 | -0.62430400 |

SCF Done: E(RB+HF-LYP) = -878.486723622  
 Sum of electronic and zero-point  
 Energies= -878.192047  
 Sum of electronic and thermal  
 Energies= -878.173146  
 Sum of electronic and thermal  
 Enthalpies= -878.172202  
 Sum of electronic and thermal  
 Free Energies= -878.240754

**(b) Conformational search on the transition state of a model system, N- Acetyl-DHIP<sup>+</sup> AcO<sup>-</sup>, with (R)- and (S)-1-phenylethanol, at HF/3-21G level of theory**

To locate the most stable conformations of the transition states, a conformational search was performed at HF/3-21G level on a model system. The unsubstituted DHIP was used as a simplified model of CF<sub>3</sub>-PIP in these calculations (Figure S-4). Diastereomeric transition state structures (R)-TS<sub>HF</sub> and (S)-TS<sub>HF</sub> were obtained by complexing the (R)- and (S)-enantiomers of 1-phenylethanol hydrogen-bonded to the acetate anion on the *Si*-face of the carbonyl carbon C<sup>2</sup>.

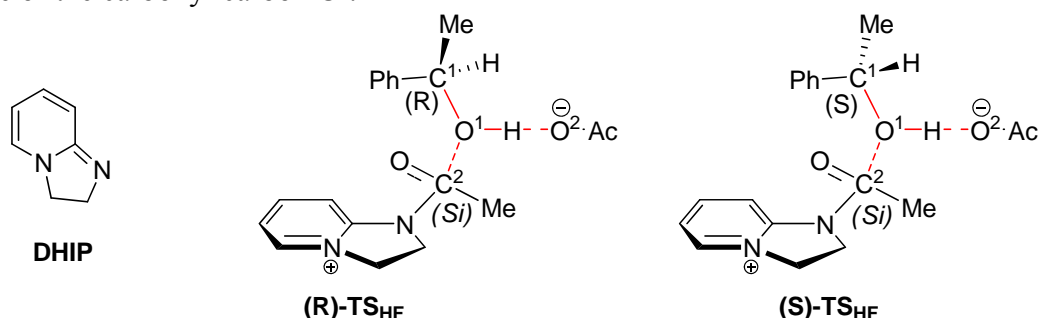

**Figure S-4.** Structures of DHIP-based diastereomeric transition states

For each of these structures, the starting geometries were generated by manually rotating each of the three highlighted bonds—C<sup>1</sup>-O<sup>1</sup>, O<sup>1</sup>-C<sup>2</sup>, and O<sup>1</sup>-H-O<sup>2</sup>—by 120°. Out of 27 structures thus generated for (R)-TS<sub>HF</sub>, 8 transition state conformers were produced (Figure S-5). The analogous operation performed with (S)-TS<sub>HF</sub> resulted in 6 TS structures (Figure S-6).

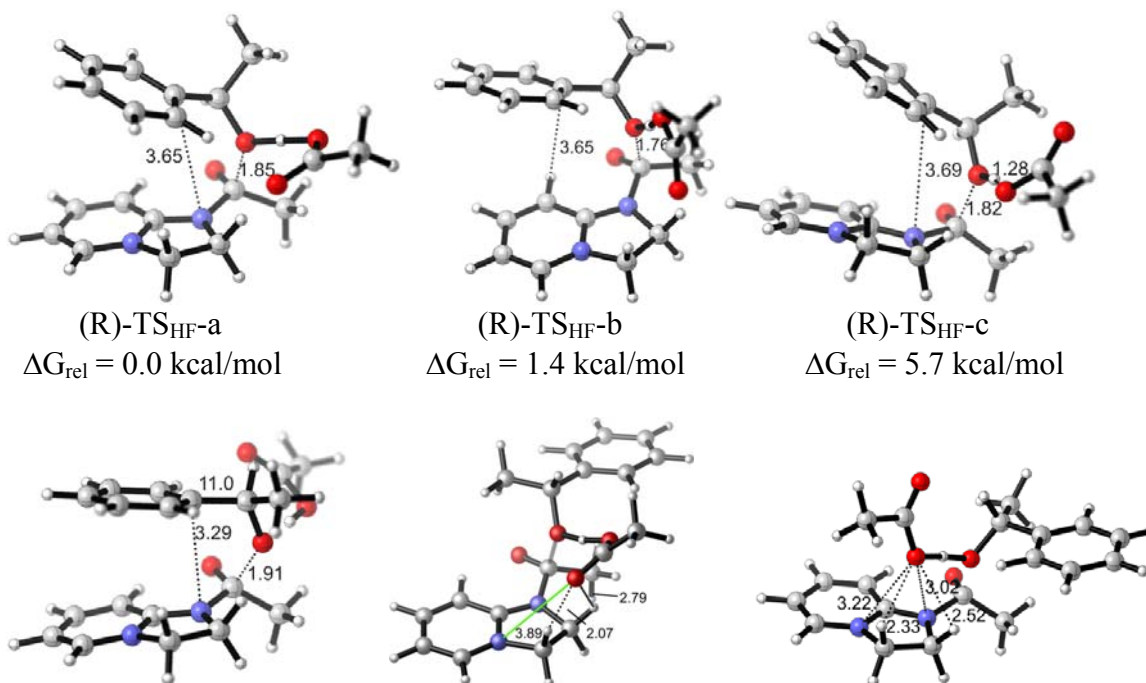

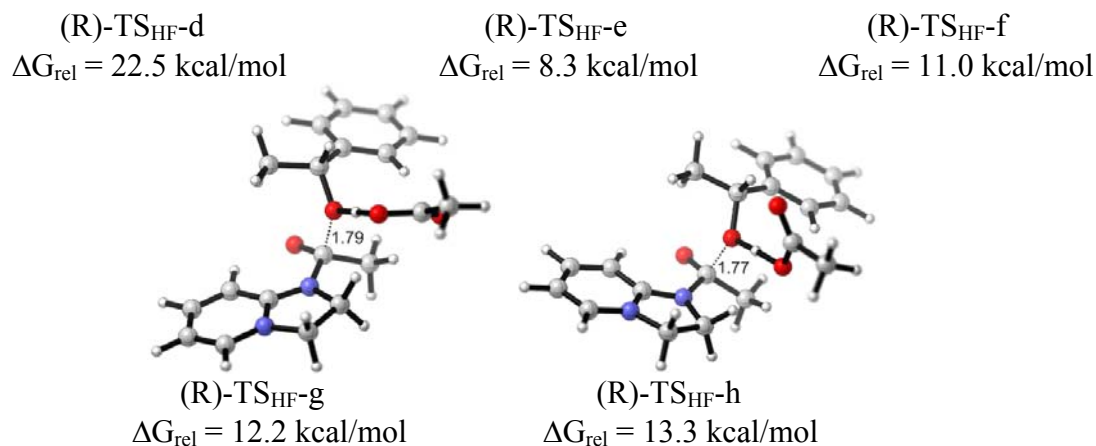

**Figure S-5.** TS of N-Acetyl-DHIP+ AcO<sup>-</sup> and (R)-1-phenylethanol

|                              |             |             |             |                                  |                |             |             |
|------------------------------|-------------|-------------|-------------|----------------------------------|----------------|-------------|-------------|
| <b>(R)-TS<sub>HF-a</sub></b> |             |             | C           | -4.27321300                      | -0.65689300    | 0.78045700  |             |
| C                            | 0.26654600  | -1.71200400 | -1.46664700 | H                                | -4.71477400    | -0.52753900 | -1.32343300 |
| O                            | 1.24944300  | -0.20003300 | -1.05987600 | H                                | -3.43485000    | -0.86464700 | 2.73132100  |
| C                            | 0.78052500  | 1.00125000  | -1.67163900 | H                                | -5.25241700    | -0.38299000 | 1.10669200  |
| O                            | -0.39914200 | -1.47241000 | -2.48367600 | C                                | -0.01655700    | 1.84837300  | -0.68934400 |
| C                            | 1.45688000  | -2.64406700 | -1.47652100 | C                                | -1.02382200    | 2.68107200  | -1.15366500 |
| O                            | 3.48042200  | -0.23482100 | -0.18321100 | C                                | 0.26487600     | 1.82670200  | 0.66984400  |
| C                            | 3.59264700  | -0.18081400 | 1.10112200  | C                                | -1.73647100    | 3.48853400  | -0.28381100 |
| O                            | 2.64304600  | -0.24594400 | 1.89493800  | H                                | -1.25329100    | 2.69732700  | -2.20276000 |
| C                            | 5.01575300  | -0.03139900 | 1.59896200  | C                                | -0.44583400    | 2.63800400  | 1.53955400  |
| H                            | 1.96926400  | -2.49165600 | -2.41392100 | H                                | 1.03723900     | 1.18930400  | 1.04980700  |
| H                            | 1.10113300  | -3.66821000 | -1.43423500 | C                                | -1.44818100    | 3.46984900  | 1.06939800  |
| H                            | 2.14547800  | -2.45356000 | -0.67238600 | H                                | -2.51028600    | 4.12881200  | -0.66072500 |
| H                            | 5.61630200  | -0.84361900 | 1.20838900  | H                                | -0.20636600    | 2.62799900  | 2.58586100  |
| H                            | 5.03540000  | -0.02929800 | 2.67706200  | H                                | -1.99253200    | 4.09882700  | 1.74649100  |
| H                            | 5.42911500  | 0.89282500  | 1.21316500  | C                                | 1.97250500     | 1.80309700  | -2.22581300 |
| H                            | 2.35008400  | -0.21382100 | -0.65768600 | H                                | 2.50708600     | 1.20368900  | -2.95332700 |
| N                            | -0.46129500 | -1.74370800 | -0.19937500 | H                                | 2.65398600     | 2.05212300  | -1.42367600 |
| C                            | -1.72351500 | -1.36209300 | -0.05668000 | H                                | 1.62999000     | 2.71536500  | -2.69896500 |
| C                            | 0.19992000  | -1.96585700 | 1.11038500  | H                                | 0.13435000     | 0.70103200  | -2.48551400 |
| C                            | -2.71479200 | -1.08051200 | -1.02775800 |                                  |                |             |             |
| N                            | -2.05842900 | -1.26783900 | 1.24562600  | SCF: E(RHF) =                    | -1135.48027039 |             |             |
| C                            | -0.87567900 | -1.49777800 | 2.12573000  | Sum of electronic and zero-point |                |             |             |
| H                            | 0.42212600  | -3.01586800 | 1.22973100  | Energies=-                       | 1135.044929    |             |             |
| H                            | 1.08709500  | -1.36401700 | 1.20188100  | Sum of electronic and thermal    |                |             |             |
| C                            | -3.95463100 | -0.74162600 | -0.59981200 | Energies=-                       | 1135.022435    |             |             |
| H                            | -2.42273600 | -1.13788700 | -2.04775400 | Sum of electronic and thermal    |                |             |             |
| C                            | -3.29865500 | -0.91706200 | 1.67277800  | Enthalpies=-                     | 1135.021491    |             |             |
| H                            | -1.11246500 | -2.24450800 | 2.86653100  | Sum of electronic and thermal    |                |             |             |
| H                            | -0.60082600 | -0.56386400 | 2.58906400  | Free Energies=-                  | 1135.098177    |             |             |
|                              |             |             |             |                                  |                |             |             |
| <b>(R)-TS<sub>HF-b</sub></b> |             |             | H           | 1.97349800                       | 3.10844200     | 3.12774000  |             |
| C                            | 0.74335900  | -0.25123300 | -2.14646300 | H                                | 1.04326100     | 1.59663800  | -0.17358400 |
| O                            | 0.37636900  | 1.07418800  | -1.05539900 | N                                | 1.16499100     | -1.21431000 | -1.11463600 |
| C                            | -0.88683700 | 1.71865900  | -1.30308800 | C                                | 0.30769500     | -1.96559200 | -0.43889200 |
| O                            | -0.29937200 | -0.53213000 | -2.77827300 | C                                | 2.54448700     | -1.34844500 | -0.58356500 |
| C                            | 1.93557400  | 0.37061800  | -2.84807900 | C                                | -1.07358100    | -2.18322400 | -0.65031700 |
| O                            | 1.53178700  | 2.21960200  | 0.70469200  | N                                | 0.90872500     | -2.58431700 | 0.59634800  |
| C                            | 2.48642500  | 1.83554800  | 1.49510500  | C                                | 2.33416400     | -2.15544400 | 0.72143600  |
| O                            | 3.06635600  | 0.75141700  | 1.43756900  | H                                | 3.16139200     | -1.87210400 | -1.29844400 |
| C                            | 2.85017000  | 2.87188900  | 2.53739900  | H                                | 2.95071900     | -0.39253800 | -0.31884600 |
| H                            | 1.54960200  | 1.13640300  | -3.50363900 | C                                | -1.73167200    | -2.99717400 | 0.20908900  |
| H                            | 2.42780700  | -0.38246200 | -3.45330400 | H                                | -1.51703700    | -1.68414600 | -1.47742400 |
| H                            | 2.63845000  | 0.81431100  | -2.16331900 | C                                | 0.24936600     | -3.40567800 | 1.45429500  |
| H                            | 3.15900500  | 3.78158500  | 2.03718200  | H                                | 2.97154700     | -3.02116300 | 0.80076900  |
| H                            | 3.64249000  | 2.50345400  | 3.16912800  | H                                | 2.43892500     | -1.49379600 | 1.56552800  |
|                              |             |             |             | C                                | -1.06727200    | -3.63716600 | 1.28906700  |

|   |             |             |             |
|---|-------------|-------------|-------------|
| H | -2.78057000 | -3.16187600 | 0.07071200  |
| H | 0.83335900  | -3.83293000 | 2.24065900  |
| H | -1.59508200 | -4.28033000 | 1.95869400  |
| H | -1.22537700 | 1.34876700  | -2.25800700 |
| C | -1.91958600 | 1.34231700  | -0.25162800 |
| C | -3.22391200 | 1.06160900  | -0.62674800 |
| C | -1.58192900 | 1.28818700  | 1.09378200  |
| C | -4.18009200 | 0.73527300  | 0.32154200  |
| H | -3.49255400 | 1.09208300  | -1.66564300 |
| C | -2.53414700 | 0.96206100  | 2.04157600  |
| H | -0.57985300 | 1.52201900  | 1.38568500  |
| C | -3.83674200 | 0.68240400  | 1.66007500  |
| H | -5.18620000 | 0.52404000  | 0.01497600  |
| H | -2.26300400 | 0.93024900  | 3.07919800  |
| H | -4.57421600 | 0.43272000  | 2.39770600  |

|   |             |            |             |
|---|-------------|------------|-------------|
| C | -0.68348900 | 3.24128100 | -1.35315200 |
| H | -1.62601200 | 3.74141800 | -1.54130600 |
| H | 0.01193900  | 3.48986300 | -2.14729600 |
| H | -0.27110600 | 3.58979500 | -0.41646200 |

SCF: E(RHF) = -1135.47657218  
Sum of electronic and zero-point  
Energies= -1135.041663  
Sum of electronic and thermal  
Energies= -1135.019033  
Sum of electronic and thermal  
Enthalpies= -1135.018089  
Sum of electronic and thermal  
Free Energies= -1135.096005

**(R)-TS<sub>HF-c</sub>**

|   |             |             |             |
|---|-------------|-------------|-------------|
| C | -0.08736700 | 1.71625700  | -1.51021000 |
| O | -1.16301100 | 0.31137100  | -1.09612500 |
| C | -0.83968600 | -0.96488600 | -1.65749300 |
| O | 0.57642000  | 1.40741100  | -2.51015900 |
| C | -1.20820000 | 2.73168100  | -1.54487100 |
| O | -2.64841400 | 0.66427700  | 0.74699600  |
| C | -3.85908800 | 0.18366000  | 0.90998200  |
| O | -4.35732700 | -0.69396100 | 0.22585500  |
| C | -4.60749400 | 0.82452300  | 2.06641100  |
| H | -1.74149800 | 2.58104300  | -2.47064500 |
| H | -0.78056600 | 3.72881700  | -1.54401300 |
| H | -1.89361300 | 2.61520300  | -0.72269500 |
| H | -4.04503600 | 0.67926900  | 2.98144400  |
| H | -5.58939700 | 0.38860000  | 2.15956400  |
| H | -4.68545800 | 1.89156800  | 1.89421200  |
| H | -1.94197300 | 0.39525800  | -0.29001600 |
| N | 0.63674200  | 1.73944800  | -0.22907100 |
| C | 1.86643600  | 1.27276100  | -0.06334700 |
| C | 0.00581200  | 2.09601500  | 1.06877400  |
| C | 2.83996100  | 0.88546200  | -1.01608700 |
| N | 2.18489800  | 1.19676300  | 1.24513900  |
| C | 1.00811800  | 1.51934400  | 2.10224800  |
| H | -0.06011800 | 3.17143600  | 1.14969500  |
| H | -0.96894400 | 1.64403700  | 1.14910300  |
| C | 4.04854200  | 0.47170700  | -0.56598000 |
| H | 2.55780100  | 0.93076400  | -2.03968300 |
| C | 3.39456200  | 0.77134300  | 1.69509300  |
| H | 1.28878800  | 2.23216900  | 2.86072000  |
| H | 0.64894800  | 0.60335500  | 2.54441000  |

|   |             |             |             |
|---|-------------|-------------|-------------|
| C | 4.35207100  | 0.41169100  | 0.81981000  |
| H | 4.79577300  | 0.17850300  | -1.27511900 |
| H | 3.52068100  | 0.74510400  | 2.75586700  |
| H | 5.30739000  | 0.07989500  | 1.16273600  |
| C | -0.11162600 | -1.84648100 | -0.65098600 |
| C | 0.84273600  | -2.75283100 | -1.08639400 |
| C | -0.40382900 | -1.78069500 | 0.70499100  |
| C | 1.49267000  | -3.58555500 | -0.19097700 |
| H | 1.07904700  | -2.80843100 | -2.13229100 |
| C | 0.24326700  | -2.61459500 | 1.60068500  |
| H | -1.14614200 | -1.09020500 | 1.04788800  |
| C | 1.19478800  | -3.51867400 | 1.15822200  |
| H | 2.22539100  | -4.28387100 | -0.54598400 |
| H | -0.00694200 | -2.57061400 | 2.64362200  |
| H | 1.69004400  | -4.16744300 | 1.85384400  |
| C | -2.13075500 | -1.63654800 | -2.15602300 |
| H | -2.54226200 | -1.05396100 | -2.97277700 |
| H | -2.86550500 | -1.66611700 | -1.36300500 |
| H | -1.92665000 | -2.64043500 | -2.50898800 |
| H | -0.17809700 | -0.75527400 | -2.48598100 |

SCF: E(RHF) = -1135.47182965  
Sum of electronic and zero-point  
Energies= -1135.035629  
Sum of electronic and thermal  
Energies= -1135.013333  
Sum of electronic and thermal  
Enthalpies= -1135.012389  
Sum of electronic and thermal  
Free Energies= -1135.089140

**(R)-TS<sub>HF-d</sub>**

|   |             |             |             |
|---|-------------|-------------|-------------|
| C | 0.82085400  | 1.46216800  | -0.57279300 |
| O | 1.52006600  | -0.21516900 | -1.15030700 |
| C | 1.36880300  | -1.59634600 | -0.75751500 |
| O | 1.04187300  | 1.66025700  | 0.62148600  |
| C | 1.56980100  | 2.18004000  | -1.67434500 |
| O | 3.74442500  | 0.44810300  | -0.33450200 |
| C | 3.93112900  | 0.20968100  | 0.95100300  |
| O | 3.27396400  | -0.57302500 | 1.61256900  |
| C | 5.08369400  | 1.00601800  | 1.51278600  |
| H | 2.61005600  | 2.20399100  | -1.39795800 |
| H | 1.18699000  | 3.19492000  | -1.73157800 |
| H | 1.46681800  | 1.68897900  | -2.62506000 |
| H | 5.96116200  | 0.84972300  | 0.89872000  |
| H | 5.27457800  | 0.71208600  | 2.53262500  |
| H | 4.83243400  | 2.05930400  | 1.46976700  |
| H | 2.81786400  | 0.12149200  | -0.73851500 |
| N | -0.57473900 | 1.20134400  | -0.93956000 |
| C | -1.59901900 | 1.29480900  | -0.10711200 |
| C | -0.97432800 | 0.65301200  | -2.24946400 |
| C | -1.67220000 | 1.82708500  | 1.20361900  |
| N | -2.73122100 | 0.84075700  | -0.68039200 |

|   |             |             |             |
|---|-------------|-------------|-------------|
| C | -2.45387100 | 0.24189400  | -2.01781000 |
| H | -0.89471900 | 1.41518000  | -3.01012600 |
| H | -0.32512600 | -0.17115500 | -2.46790900 |
| C | -2.88176000 | 1.87388700  | 1.80861400  |
| H | -0.76023600 | 2.13813100  | 1.65280500  |
| C | -3.94096600 | 0.86391100  | -0.06061500 |
| H | -3.12465300 | 0.66074300  | -2.75074800 |
| H | -2.57156200 | -0.82599000 | -1.94265700 |
| C | -4.05613400 | 1.38577300  | 1.17443900  |
| H | -2.95509000 | 2.28030200  | 2.79691100  |
| H | -4.76114200 | 0.45699500  | -0.61146100 |
| H | -5.00332800 | 1.41746000  | 1.66664200  |
| C | 0.08824800  | -1.86969200 | 0.03245700  |
| C | -0.96513200 | -2.63743900 | -0.43896200 |
| C | 0.00768500  | -1.34417100 | 1.32105200  |
| C | -2.08582300 | -2.87142300 | 0.34975600  |
| H | -0.91113400 | -3.08606300 | -1.41097900 |
| C | -1.10362600 | -1.57957100 | 2.10593700  |
| H | 0.83474500  | -0.76832600 | 1.68476500  |
| C | -2.15914000 | -2.34105200 | 1.62252400  |
| H | -2.88236700 | -3.48607500 | -0.02488300 |
| H | -1.14403800 | -1.17969500 | 3.10024000  |
| H | -3.01511600 | -2.53252100 | 2.24011700  |



C 1.51886700 -2.45626100 -2.01934000  
H 2.47059800 -2.22030400 -2.47803500  
H 0.74141800 -2.23480700 -2.74305300  
H 1.49482200 -3.51534800 -1.78814200  
H 2.17363000 -1.84897400 -0.08118300  
SCF: E(RHF) = -1135.44734199  
Sum of electronic and zero-point

Energies= -1135.009787  
Sum of electronic and thermal  
Energies= -1134.987559  
Sum of electronic and thermal  
Enthalpies= -1134.986615  
Sum of electronic and thermal  
Free Energies= -1135.062353

**(R)-TS<sub>HF-e</sub>**

C -0.03844200 1.12834300 -0.91432600  
O 0.49104600 0.00619700 0.25848500  
C 1.48760100 0.33007900 1.26249700  
O -0.01684000 2.29980400 -0.46671900  
C 0.83857700 0.74296500 -2.09302900  
O 0.60916000 -2.36671800 0.04748800  
C -0.21648600 -3.25948700 0.53125900  
O -1.42061200 -3.09214200 0.68145000  
C 0.45998700 -4.56944300 0.87237900  
H 1.82290100 1.13930900 -1.90388600  
H 0.43782000 1.21300600 -2.98397000  
H 0.91444800 -0.32216400 -2.23621700  
H 0.96752700 -4.94575300 -0.00730000  
H -0.26666600 -5.28408700 1.22420800  
H 1.21284800 -4.39416400 1.63146300  
H 0.45105600 -1.20023400 0.11744500  
N -1.39159400 0.51811000 -1.05622700  
C -2.44950200 0.93350400 -0.37606600  
C -1.66492300 -0.76510200 -1.74745700  
C -2.65649400 2.13071000 0.35095400  
N -3.45338100 0.03498100 -0.43400000  
C -3.00537700 -1.21879500 -1.11695700  
H -1.74672900 -0.59547200 -2.81111300  
H -0.88866400 -1.47476000 -1.53355700  
C -3.85992700 2.31902400 0.94460400  
H -1.84062400 2.81197100 0.38582500  
C -4.65431000 0.22100700 0.16837000  
H -3.74018900 -1.52310200 -1.84436300  
H -2.81029300 -1.97069500 -0.36933500

C -4.89679600 1.35342600 0.85826600  
H -4.03447400 3.22195800 1.49403700  
H -5.36370800 -0.57076300 0.06029700  
H -5.84097300 1.51147500 1.33165400  
C 2.86249100 0.49996200 0.62394100  
C 3.57308200 1.68631000 0.64055600  
C 3.41311400 -0.60531800 -0.02008400  
C 4.82025500 1.76951500 0.03709400  
H 3.16090100 2.55281900 1.11433100  
C 4.65347100 -0.52415100 -0.61939500  
H 2.84894500 -1.51728600 -0.05328000  
C 5.36410400 0.66685800 -0.59100700  
H 5.35890900 2.69657700 0.05821500  
H 5.06689600 -1.38400200 -1.10929800  
H 6.32840400 0.73097200 -1.05565900  
C 1.02513900 1.48760200 2.15057200  
H 0.05241500 1.23787600 2.55753200  
H 0.92597000 2.38980600 1.57405800  
H 1.71957900 1.62565000 2.97146400  
H 1.54309900 -0.55977700 1.88039100

SCF: E(RHF) = -1135.46619992  
Sum of electronic and zero-point  
Energies= -1135.030860  
Sum of electronic and thermal  
Energies= -1135.008413  
Sum of electronic and thermal  
Enthalpies= -1135.007469  
Sum of electronic and thermal  
Free Energies= -1135.084946

**(R)-TS<sub>HF-f</sub>**

C -0.16781700 1.87841000 -0.07518400  
O 0.61065200 0.38793600 0.39745300  
C 1.76266400 0.24060800 1.26660400  
O -0.53994000 2.53643100 0.91375900  
C 0.87430200 2.41974200 -1.03510800  
O -0.55658200 -1.66624400 0.00259700  
C -0.49604800 -2.60853000 0.91999900  
O 0.14629800 -2.52681400 1.95157400  
C -1.31490900 -3.83542100 0.56812900  
H 1.68217100 2.83188300 -0.45136200  
H 0.42447000 3.22304400 -1.60827600  
H 1.27368100 1.66702200 -1.69138400  
H -2.35420500 -3.55086600 0.44874600  
H -1.22144600 -4.57710700 1.34510600  
H -0.96902000 -4.23818600 -0.37651100  
H 0.01307200 -0.63588100 0.24592000  
N -1.23675900 1.15587100 -0.81538600  
C -2.42945800 0.89172300 -0.30262400  
C -1.00055500 0.39375000 -2.06111800  
C -3.05978700 1.40840500 0.85576800  
N -3.10059200 0.00128500 -1.05780600  
C -2.23239100 -0.54436400 -2.14139100  
H -0.94933200 1.06897300 -2.90185700  
H -0.09478200 -0.17449700 -1.96903200  
C -4.31420700 0.98654500 1.14276200  
H -2.49344300 2.09253100 1.44101300  
C -4.35590400 -0.42664500 -0.76457300  
H -2.74805900 -0.49393800 -3.08642900  
H -1.95142300 -1.54433700 -1.86569900

C -4.99634200 0.05081000 0.31972800  
H -4.80510000 1.36631800 2.01574000  
H -4.77853500 -1.14382500 -1.43471900  
H -5.98555900 -0.27506700 0.55605100  
C 2.99880900 0.01088700 0.39976100  
C 4.22113400 0.61858500 0.62649100  
C 2.88633300 -0.88060900 -0.66439600  
C 5.31021600 0.34690800 -0.19063900  
H 4.33787100 1.30603800 1.43889500  
C 3.96784700 -1.15448200 -1.47556500  
H 1.94563100 -1.36455300 -0.83309400  
C 5.18824300 -0.53688900 -1.24334600  
H 6.24922900 0.82866700 0.00057100  
H 3.86595800 -1.85026200 -2.28574900  
H 6.02963200 -0.74795300 -1.87355700  
C 1.87985600 1.39338600 2.27057300  
H 0.91589800 1.56157700 2.72306600  
H 2.18270100 2.31715600 1.79761400  
H 2.60082000 1.13506300 3.03765000  
H 1.57588000 -0.66928800 1.82134900

SCF: E(RHF) = -1135.46186351  
Sum of electronic and zero-point  
Energies= -1135.026506  
Sum of electronic and thermal  
Energies= -1135.004082  
Sum of electronic and thermal  
Enthalpies= -1135.003138  
Sum of electronic and thermal  
Free Energies= -1135.080582

**(R)-TS<sub>HF-g</sub>**

|   |             |             |             |
|---|-------------|-------------|-------------|
| C | -0.29783900 | 0.55238200  | -1.03264900 |
| O | 0.49330800  | -0.16858800 | 0.40309000  |
| C | 1.33394800  | 0.59746200  | 1.29197500  |
| O | -0.27650200 | 1.79047900  | -0.95402100 |
| C | 0.46948900  | -0.20852200 | -2.09281800 |
| O | 0.43894700  | -2.48932300 | 1.00761500  |
| C | 1.26470100  | -3.28776900 | 0.37925900  |
| O | 1.91628300  | -2.97201900 | -0.60995500 |
| C | 1.34129000  | -4.67498000 | 0.98341800  |
| H | 1.40601000  | 0.30878000  | -2.22810100 |
| H | -0.08959100 | -0.16377600 | -3.02226400 |
| H | 0.68542500  | -1.22690500 | -1.81987100 |
| H | 1.69488100  | -4.59548900 | 2.00449700  |
| H | 2.00628400  | -5.29609900 | 0.40484500  |
| H | 0.34926900  | -5.10915400 | 1.01572800  |
| H | 0.47476000  | -1.31023300 | 0.68686900  |
| N | -1.62841000 | -0.08109300 | -0.78272200 |
| C | -2.69209700 | 0.57287200  | -0.35849600 |
| C | -1.87104500 | -1.54437900 | -0.85365800 |
| C | -2.90107300 | 1.96356600  | -0.15518300 |
| N | -3.72166900 | -0.26737900 | -0.10835800 |
| C | -3.33103500 | -1.68520000 | -0.33640300 |
| H | -1.77789800 | -1.88139400 | -1.87377200 |
| H | -1.17541100 | -2.05687600 | -0.21449600 |
| C | -4.11584300 | 2.37551800  | 0.27315500  |
| H | -2.07706000 | 2.60407500  | -0.35656000 |
| C | -4.94228900 | 0.15108500  | 0.32519800  |
| H | -3.99184700 | -2.12992900 | -1.06402700 |
| H | -3.37922000 | -2.22284100 | 0.59796200  |

**(R)-TS<sub>HF-h</sub>**

|   |             |             |             |
|---|-------------|-------------|-------------|
| C | -0.32806500 | 0.90024200  | -1.12628200 |
| O | 0.45580700  | -0.06947300 | 0.13558100  |
| C | 1.35321700  | 0.42815300  | 1.16317600  |
| O | -0.33313500 | 2.10325200  | -0.81813200 |
| C | 0.46007900  | 0.37637900  | -2.30927200 |
| O | 0.74029200  | -2.41454100 | -0.28575100 |
| C | 0.93930300  | -3.19803400 | 0.75015100  |
| O | 1.01101400  | -2.80849400 | 1.90528700  |
| C | 1.08576300  | -4.66151700 | 0.37798500  |
| H | 1.43680400  | 0.83111500  | -2.26711200 |
| H | -0.03658300 | 0.69463700  | -3.21957500 |
| H | 0.57312300  | -0.69473700 | -2.29950400 |
| H | 0.21346200  | -4.98407000 | -0.17783700 |
| H | 1.20965700  | -5.26086800 | 1.26601300  |
| H | 1.94536600  | -4.77521000 | -0.27200700 |
| H | 0.59549600  | -1.18310900 | -0.03801800 |
| N | -1.63521000 | 0.19315100  | -1.00848600 |
| C | -2.67406800 | 0.67814500  | -0.35357300 |
| C | -1.86339400 | -1.21211100 | -1.43678200 |
| C | -2.90112400 | 1.97235200  | 0.18259600  |
| N | -3.64599600 | -0.25018900 | -0.21371000 |
| C | -3.20859300 | -1.57018700 | -0.74714700 |
| H | -1.95372200 | -1.24982000 | -2.51198200 |
| H | -1.05696000 | -1.84057000 | -1.09904500 |
| C | -4.08200400 | 2.21448700  | 0.79723800  |
| H | -2.11638600 | 2.68041900  | 0.06807600  |
| C | -4.83145900 | -0.00432800 | 0.40760100  |
| H | -3.94533400 | -1.94951900 | -1.43715300 |
| H | -3.07204000 | -2.25276600 | 0.07796800  |

|   |             |             |             |
|---|-------------|-------------|-------------|
| C | -5.17572700 | 1.46012600  | 0.52519600  |
| H | -4.28586100 | 3.42182900  | 0.42717100  |
| H | -5.67107800 | -0.61347900 | 0.48849200  |
| H | -6.12977200 | 1.79893900  | 0.86503200  |
| C | 2.61266000  | 1.04987500  | 0.59123500  |
| C | 3.30420700  | 0.12253900  | -0.18306100 |
| C | 3.13690400  | 2.32351300  | 0.73151300  |
| C | 4.49429100  | 0.46855000  | -0.79334100 |
| H | 2.90777900  | -0.86427500 | -0.31671800 |
| C | 4.33161400  | 2.67019600  | 0.11828000  |
| H | 2.61910500  | 3.05921600  | 1.31123700  |
| C | 5.01473400  | 1.74465000  | -0.64481500 |
| H | 5.01482700  | -0.25846900 | -1.38559800 |
| H | 4.71994900  | 3.66305800  | 0.23664000  |
| H | 5.93851200  | 2.01097300  | -1.12005600 |
| C | 0.52812200  | 1.71687800  | 1.96148800  |
| H | -0.37784600 | 1.28378900  | 2.36975100  |
| H | 0.26071400  | 2.46438000  | 1.23367400  |
| H | 1.08797900  | 2.16254100  | 2.77518000  |
| H | 1.63428700  | -0.10351100 | 2.06635300  |

SCF: E(RHF) = -1135.46057555  
Sum of electronic and zero-point  
Energies= -1135.025119  
Sum of electronic and thermal  
Energies= -1135.002693  
Sum of electronic and thermal  
Enthalpies= -1135.001749  
Sum of electronic and thermal  
Free Energies= -1135.078806

|   |             |             |             |
|---|-------------|-------------|-------------|
| C | -5.08519700 | 1.21368500  | 0.91918700  |
| H | -4.26752000 | 3.18802700  | 1.20359600  |
| H | -5.51663000 | -0.82308500 | 0.45659300  |
| H | -6.01300100 | 1.41790300  | 1.40699300  |
| C | 2.69564100  | 0.81380100  | 0.54803300  |
| C | 3.31906400  | -0.11153100 | -0.28594300 |
| C | 3.33284200  | 2.01651500  | 0.79617300  |
| C | 4.54937300  | 0.16164600  | -0.84811600 |
| H | 2.82741600  | -1.04178000 | -0.48978900 |
| C | 4.57009600  | 2.29283200  | 0.23167500  |
| H | 2.87194200  | 2.74998500  | 1.42460400  |
| C | 5.18226200  | 1.36848100  | -0.59016300 |
| H | 5.01680200  | -0.56364300 | -1.48523500 |
| H | 5.04758400  | 3.23145700  | 0.43491300  |
| H | 6.13858300  | 1.58116100  | -1.02611100 |
| C | 0.66783400  | 1.52916600  | 1.97513100  |
| H | -0.28718200 | 1.15128500  | 2.31989400  |
| H | 0.49571600  | 2.39896700  | 1.36367700  |
| H | 1.26434700  | 1.78488900  | 2.84298800  |
| H | 1.51626500  | -0.42641500 | 1.80754700  |

SCF: E(RHF) = -1135.45845499  
Sum of electronic and zero-point  
Energies= -1135.022499  
Sum of electronic and thermal  
Energies= -1135.000076  
Sum of electronic and thermal  
Enthalpies= -1134.999132  
Sum of electronic and thermal  
Free Energies= -1135.076972

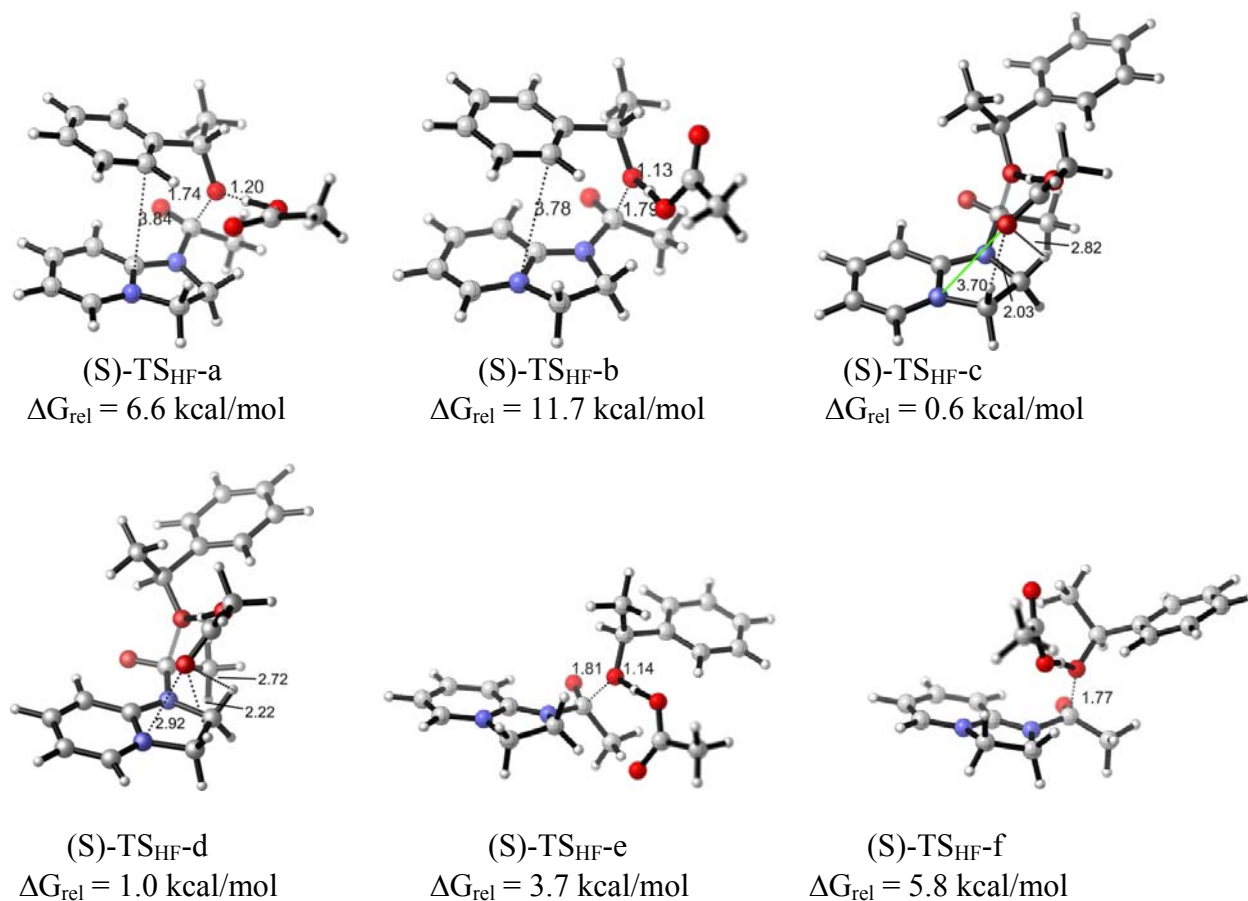

**Figure S-6.** TS of N-Acetyl-DHIP+ AcO<sup>-</sup> and (S)-1-phenylethanol

|                              |             |             |             |                                  |                |             |             |
|------------------------------|-------------|-------------|-------------|----------------------------------|----------------|-------------|-------------|
| <b>(S)-TS<sub>HF</sub>-a</b> |             |             | H           | -0.92973300                      | 2.42849200     | 0.98502900  |             |
| C                            | -0.42249600 | -0.30447900 | -2.08696300 | C                                | 3.14510500     | 2.52023200  | 0.38256900  |
| O                            | -1.24769600 | -1.02434800 | -0.73111700 | H                                | 4.30052200     | 0.95035900  | -0.53374500 |
| C                            | -0.75486500 | -2.23942400 | -0.12665500 | H                                | 1.66410700     | 3.86521400  | 1.12770700  |
| O                            | 0.59206400  | -0.97102300 | -2.38476300 | H                                | 3.97131500     | 2.97281500  | 0.88582600  |
| C                            | -1.61609500 | -0.23447300 | -3.02361000 | C                                | 0.54574900     | -1.98119000 | 0.63130900  |
| O                            | -3.23149300 | -0.19851800 | 0.32790500  | C                                | 1.70120300     | -2.71680800 | 0.43195500  |
| C                            | -3.19815000 | 0.42733000  | 1.46768400  | C                                | 0.54860700     | -0.97871700 | 1.59736500  |
| O                            | -2.19088200 | 0.93437700  | 1.96534700  | C                                | 2.83573900     | -2.47290000 | 1.19191300  |
| C                            | -4.54550700 | 0.50473500  | 2.15333400  | H                                | 1.72852500     | -3.47986000 | 0.31749200  |
| H                            | -1.80481700 | -1.23718300 | -3.37476100 | C                                | 1.67674000     | -0.73993300 | 2.35854400  |
| H                            | -1.35329300 | 0.38688900  | -3.87251000 | H                                | -0.33420400    | -0.39030300 | 1.75585000  |
| H                            | -2.50719500 | 0.14270700  | -2.54996800 | C                                | 2.82671300     | -1.48816000 | 2.16058600  |
| H                            | -5.26820700 | 0.93727700  | 1.47294000  | H                                | 3.71991800     | -3.05756000 | 1.02660000  |
| H                            | -4.47207200 | 1.09072700  | 3.05544400  | H                                | 1.65655800     | 0.02493500  | 3.11060800  |
| H                            | -4.88002700 | -0.49935800 | 2.38590700  | H                                | 3.69954200     | -1.30840500 | 2.75777700  |
| H                            | -2.23604900 | -0.58893200 | -0.20189100 | C                                | -0.70472000    | -3.37480400 | -1.15408900 |
| N                            | -0.16767900 | 1.00535100  | -1.45471500 | H                                | 0.01203500     | -3.14227600 | -1.92391100 |
| C                            | 0.99775800  | 1.35326200  | -0.91859100 | H                                | -1.68565400    | -3.46761100 | -1.60553000 |
| C                            | -1.22918100 | 1.97863300  | -1.10967700 | H                                | -0.46124500    | -4.31538700 | -0.67369600 |
| C                            | 2.28252700  | 0.78579500  | -1.07476100 | H                                | -1.49890900    | -2.50044000 | 0.62020300  |
| N                            | 0.86077900  | 2.43703800  | -0.12968400 |                                  |                |             |             |
| C                            | -0.58210600 | 2.79633100  | 0.03315800  | SCF: E(RHF) =                    | -1135.47104173 |             |             |
| H                            | -1.45401600 | 2.59216500  | -1.97062200 | Sum of electronic and zero-point |                |             |             |
| H                            | -2.10611500 | 1.46380000  | -0.76991100 | Energies=                        | -1135.035616   |             |             |
| C                            | 3.32113000  | 1.37087100  | -0.43136500 | Sum of electronic and thermal    |                |             |             |
| H                            | 2.34934000  | -0.09378300 | -1.66747500 | Energies=                        | -1135.013383   |             |             |
| C                            | 1.90066800  | 3.01773100  | 0.52141500  | Sum of electronic and thermal    |                |             |             |
| H                            | -0.71088000 | 3.86088000  | -0.07528700 | Enthalpies=                      | -1135.012438   |             |             |
|                              |             |             |             | Sum of electronic and thermal    |                |             |             |

Free Energies= -1135.087723

**(S)-TS<sub>HF-b</sub>**

|   |             |             |             |
|---|-------------|-------------|-------------|
| C | -0.25201000 | 0.67979800  | -2.02619600 |
| O | -1.40367900 | -0.24418200 | -1.01243900 |
| C | -1.34206000 | -1.67124500 | -0.77332300 |
| O | 0.47568900  | -0.09755400 | -2.66463900 |
| C | -1.32602800 | 1.51567200  | -2.69287400 |
| O | -2.64340500 | 0.90094100  | 0.68871200  |
| C | -3.73009000 | 0.34089100  | 1.16625400  |
| O | -4.09132400 | -0.79427700 | 0.90130400  |
| C | -4.51199300 | 1.24151700  | 2.10467100  |
| H | -1.84057400 | 0.87355200  | -3.39000900 |
| H | -0.85069100 | 2.32185400  | -3.24158700 |
| H | -2.03957100 | 1.91294600  | -1.99043900 |
| H | -3.87632400 | 1.53490700  | 2.93196900  |
| H | -5.38590400 | 0.72659900  | 2.47069800  |
| H | -4.80110600 | 2.14249500  | 1.57653600  |
| H | -2.03467100 | 0.28241300  | -0.23173400 |
| N | 0.40642800  | 1.42655700  | -0.93269500 |
| C | 1.62657100  | 1.16319200  | -0.48672200 |
| C | -0.25208300 | 2.49504900  | -0.13395300 |
| C | 2.61143100  | 0.26805400  | -0.97344000 |
| N | 1.92265900  | 1.91326700  | 0.59443200  |
| C | 0.74995800  | 2.71934800  | 1.02998500  |
| H | -0.35483600 | 3.38442600  | -0.73768900 |
| H | -1.20638200 | 2.15501800  | 0.23109300  |
| C | 3.80126900  | 0.21330000  | -0.33201300 |
| H | 2.34507400  | -0.32714200 | -1.81204700 |
| C | 3.11926300  | 1.85496200  | 1.23985800  |
| H | 1.03636300  | 3.75245000  | 1.14639100  |
| H | 0.37754800  | 2.31892500  | 1.96051400  |

**(S)-TS<sub>HF-c</sub>**

|   |             |             |             |
|---|-------------|-------------|-------------|
| C | -0.24790100 | 1.41652600  | -0.92350500 |
| O | 0.58265800  | 0.23122600  | -0.00645500 |
| C | 1.51410700  | 0.75250300  | 0.96155500  |
| O | -0.27760000 | 2.49258000  | -0.27714200 |
| C | 0.53542400  | 1.32148900  | -2.21989400 |
| O | 0.62428100  | -2.15092700 | -0.16672700 |
| C | -0.17379000 | -3.06873300 | 0.30730800  |
| O | -1.38348900 | -2.93993500 | 0.46203700  |
| C | 0.53709200  | -4.36454700 | 0.63755000  |
| H | 1.50645100  | 1.75649000  | -2.03956100 |
| H | 0.02659700  | 1.90468900  | -2.97885900 |
| H | 0.66879400  | 0.30689300  | -2.55740700 |
| H | 1.06805200  | -4.71174800 | -0.24014600 |
| H | -0.17232900 | -5.10575800 | 0.96910600  |
| H | 1.27407500  | -4.17900500 | 1.40995600  |
| H | 0.51279400  | -0.95840800 | -0.08158000 |
| N | -1.53088200 | 0.68516800  | -1.02055000 |
| C | -2.57421200 | 0.92061300  | -0.23677400 |
| C | -1.73070400 | -0.52985200 | -1.84633400 |
| C | -2.81900700 | 1.98266600  | 0.66633100  |
| N | -3.51546300 | -0.03247600 | -0.37841300 |
| C | -3.03471200 | -1.13717900 | -1.26572900 |
| H | -1.83444400 | -0.25337700 | -2.88485100 |
| H | -0.90459900 | -1.20306600 | -1.70901500 |
| C | -3.99608600 | 1.99253100  | 1.33847300  |
| H | -2.05058700 | 2.71123400  | 0.76390200  |
| C | -4.68751300 | -0.02772500 | 0.30347200  |
| H | -3.77788000 | -1.35090600 | -2.01654800 |
| H | -2.79002100 | -1.98320500 | -0.64572300 |

**(S)-TS<sub>HF-d</sub>**

|   |             |            |             |
|---|-------------|------------|-------------|
| C | -0.13510400 | 1.62373100 | -0.77456600 |
| O | 0.69289200  | 0.28871000 | -0.02051400 |
| C | 1.67131200  | 0.65979000 | 0.96668500  |
| O | -0.16855600 | 2.57966100 | 0.03309100  |

|   |             |             |             |
|---|-------------|-------------|-------------|
| C | 4.08213100  | 1.02548700  | 0.80018900  |
| H | 4.55188000  | -0.46389800 | -0.68509100 |
| H | 3.22838500  | 2.49534100  | 2.08847100  |
| H | 5.02593800  | 0.97341000  | 1.29729300  |
| C | -0.15486800 | -1.98652000 | 0.13345200  |
| C | 0.77501800  | -2.97656900 | -0.12782600 |
| C | -0.02875000 | -1.24681600 | 1.30820500  |
| C | 1.80748600  | -3.23295600 | 0.76477100  |
| H | 0.70322100  | -3.55550800 | -1.02521200 |
| C | 0.99423100  | -1.50293800 | -2.19807500 |
| H | -0.75261300 | -0.48274200 | 1.51239600  |
| C | 1.92080300  | -2.50039500 | 1.92893500  |
| H | 2.51491400  | -4.00958300 | 0.54740300  |
| H | 1.06536100  | -0.93881500 | 3.10843100  |
| H | 2.71138600  | -2.70618900 | 2.62385500  |
| C | -1.38072700 | -2.43076100 | -2.10057500 |
| H | -0.51068000 | -2.20240700 | -2.69344600 |
| H | -2.26110700 | -2.11042100 | -2.64402600 |
| H | -1.46037900 | -3.49777200 | -1.92733200 |
| H | -2.24439700 | -1.89246800 | -0.21694900 |

SCF: E(RHF) = -1135.46211848  
Sum of electronic and zero-point  
Energies= -1135.026097  
Sum of electronic and thermal  
Energies= -1135.003723  
Sum of electronic and thermal  
Enthalpies= -1135.002779  
Sum of electronic and thermal  
Free Energies= -1135.079539

|   |             |             |             |
|---|-------------|-------------|-------------|
| C | -4.96681100 | 0.97309500  | 1.16258900  |
| H | -4.19802700 | 2.79117300  | 2.02329700  |
| H | -5.34438000 | -0.84951800 | 0.11683000  |
| H | -5.88911800 | 0.98780100  | 1.70072100  |
| C | 2.94880700  | 0.64140800  | 0.47531700  |
| C | 3.38820300  | -0.48987400 | -0.20036700 |
| C | 3.84611300  | 1.66548900  | 0.73107900  |
| C | 4.70724700  | -0.58890200 | -0.60342600 |
| H | 2.69934300  | -1.28616600 | -0.39556000 |
| C | 5.16799300  | 1.56495000  | 0.32930100  |
| H | 3.50991200  | 2.54929500  | 1.23940000  |
| C | 5.60188400  | 0.43590300  | -0.34030100 |
| H | 5.03848500  | -1.46660600 | -1.12360300 |
| H | 5.85088000  | 2.36640800  | 0.53308000  |
| H | 6.62351100  | 0.35502000  | -0.65597800 |
| C | 1.32638800  | -0.00185700 | 2.28651200  |
| H | 1.55039100  | -1.05096000 | 2.14604600  |
| H | 0.29993400  | 0.09540400  | 2.62150100  |
| H | 1.98749000  | 0.39998700  | 3.04459900  |
| H | 1.24716200  | 1.79090600  | 1.08048900  |

SCF: E(RHF) = -1135.47742532  
Sum of electronic and zero-point  
Energies= -1135.042386  
Sum of electronic and thermal  
Energies= -1135.019816  
Sum of electronic and thermal  
Enthalpies= -1135.018872  
Sum of electronic and thermal  
Free Energies= -1135.097182

|   |             |             |             |
|---|-------------|-------------|-------------|
| C | 0.69480600  | 1.71245400  | -2.04132800 |
| O | 0.35752300  | -2.07350800 | -0.12613900 |
| C | -0.72460200 | -2.70523900 | 0.22462200  |
| O | -1.84514000 | -2.20141000 | 0.25547300  |
| C | -0.48869400 | -4.15808700 | 0.58083600  |
| H | 1.65658300  | 2.11720100  | -1.76588500 |

|   |             |             |             |
|---|-------------|-------------|-------------|
| H | 0.21407400  | 2.39780100  | -2.73054300 |
| H | 0.84607100  | 0.75442800  | -2.50964200 |
| H | 0.01762000  | -4.64948000 | -0.24061100 |
| H | -1.42480200 | -4.64779800 | 0.79773000  |
| H | 0.16704200  | -4.20886400 | 1.44207000  |
| H | 0.45380700  | -0.87137400 | -0.08835000 |
| N | -1.40436300 | 0.91593700  | -1.00787800 |
| C | -2.42819400 | 0.94840700  | -0.16266300 |
| C | -1.59582300 | -0.11592600 | -2.05278900 |
| C | -2.61173900 | 1.71034500  | 1.01353300  |
| N | -3.41326400 | 0.12631400  | -0.55862400 |
| C | -3.03668500 | -0.63172700 | -1.78261300 |
| H | -1.51034300 | 0.32705300  | -3.03159800 |
| H | -0.86866400 | -0.89719100 | -1.92146100 |
| C | -3.76396700 | 1.54404800  | 1.70860200  |
| H | -1.82440400 | 2.37270300  | 1.28189100  |
| C | -4.55316300 | -0.05922900 | 0.14890700  |
| H | -3.72232800 | -0.38259400 | -2.57758500 |
| H | -3.03806600 | -1.67699100 | -1.54235300 |
| C | -4.76800000 | 0.63891200  | 1.28215500  |
| H | -3.91743300 | 2.10821700  | 2.60621800  |
| H | -5.24169700 | -0.77466600 | -0.24479000 |
| H | -5.66569800 | 0.50237100  | 1.84410200  |
| C | 3.08004400  | 0.38034300  | 0.47399100  |
| C | 4.10328400  | 1.27468100  | 0.74132700  |

|   |            |             |             |
|---|------------|-------------|-------------|
| C | 3.36642900 | -0.78529700 | -0.22554900 |
| C | 5.39885400 | 1.01285700  | 0.32536700  |
| H | 3.88770100 | 2.18296200  | 1.27172200  |
| C | 4.65868400 | -1.04605000 | -0.64158300 |
| H | 2.57994600 | -1.48407400 | -0.42664500 |
| C | 5.67948100 | -0.14916800 | -0.36860000 |
| H | 6.18075500 | 1.71538600  | 0.53839000  |
| H | 4.87136800 | -1.94971200 | -1.17902100 |
| H | 6.68016200 | -0.35478300 | -0.69462600 |
| C | 1.38758000 | -0.10223700 | 2.27122000  |
| H | 1.46412000 | -1.16691600 | 2.09682700  |
| H | 0.38400200 | 0.12481200  | 2.61329100  |
| H | 2.09772000 | 0.18396700  | 3.03742800  |
| H | 1.53508700 | 1.71851400  | 1.12836400  |

SCF: E(RHF) = -1135.47819899  
Sum of electronic and zero-point  
Energies= -1135.042719  
Sum of electronic and thermal  
Energies= -1135.020304  
Sum of electronic and thermal  
Enthalpies= -1135.019359  
Sum of electronic and thermal  
Free Energies= -1135.096648

**(S)-TS<sub>HF-e</sub>**

|   |             |             |             |
|---|-------------|-------------|-------------|
| C | 0.53970800  | 0.56409100  | 1.02767100  |
| O | -0.60050200 | -0.01916700 | -0.25240100 |
| C | -1.29130600 | 1.01230000  | -0.97772700 |
| O | 0.53931800  | 1.80339700  | 1.02639500  |
| C | -0.03654000 | -0.25682400 | 2.15628400  |
| O | -1.48218700 | -2.22741500 | -0.61780200 |
| C | -1.19877000 | -3.28679400 | 0.06620500  |
| O | -0.28095900 | -3.37552000 | 0.89073500  |
| C | -2.10116700 | -4.47218600 | -0.21991000 |
| H | -1.01432900 | 0.14209300  | 2.38139400  |
| H | 0.60104100  | -0.12398200 | 3.02435700  |
| H | -0.11719900 | -1.30411200 | 1.92212500  |
| H | -3.11402700 | -4.22439600 | 0.07609900  |
| H | -1.75928800 | -5.33983400 | 0.32140200  |
| H | -2.11192000 | -4.66437400 | -1.28536800 |
| H | -0.98806900 | -1.07944600 | -0.39451600 |
| N | 1.75185800  | -0.07099700 | 0.44680300  |
| C | 2.88417100  | 0.56936400  | 0.22146600  |
| C | 1.77971300  | -1.42511900 | -0.16730600 |
| C | 3.24369600  | 1.92623600  | 0.43079600  |
| N | 3.82387100  | -0.27167200 | -0.27278700 |
| C | 3.29444200  | -1.66760400 | -0.33332400 |
| H | 1.28075100  | -2.15772900 | 0.44247100  |
| H | 1.27906100  | -1.36504700 | -1.11967400 |
| C | 4.50787800  | 2.30837700  | 0.13481600  |
| H | 2.48369500  | 2.57632500  | 0.79214200  |
| C | 5.09228400  | 0.11678000  | -0.56782600 |
| H | 3.71363500  | -2.23051600 | 0.48794000  |
| H | 3.54775400  | -2.12179600 | -1.27732600 |

|   |             |             |             |
|---|-------------|-------------|-------------|
| C | 5.46927900  | 1.39516300  | -0.37928300 |
| H | 4.79079700  | 3.33086400  | 0.28321400  |
| H | 5.74151300  | -0.64249100 | -0.94777000 |
| H | 6.46180800  | 1.71194100  | -0.61370800 |
| C | -2.68801800 | 1.26495500  | -0.43216300 |
| C | -3.50865400 | 0.21633700  | -0.03994800 |
| C | -3.16936800 | 2.56194300  | -0.35410200 |
| C | -4.78998700 | 0.46931900  | 0.41603900  |
| H | -3.14567900 | -0.78851300 | -0.10450200 |
| C | -4.45280000 | 2.81522800  | 0.09907800  |
| H | -2.53450900 | 3.37979800  | -0.63735300 |
| C | -5.26763200 | 1.76722800  | 0.48658600  |
| H | -5.41659600 | -0.34783200 | 0.71642100  |
| H | -4.80989300 | 3.82492600  | 0.15621800  |
| H | -6.26106900 | 1.95871300  | 0.84205000  |
| C | -1.35181900 | 0.61505100  | -2.46137300 |
| H | -1.88041100 | -0.32402900 | -2.56383200 |
| H | -0.34721300 | 0.49200200  | -2.85240500 |
| H | -1.86340400 | 1.37635000  | -3.03751200 |
| H | -0.70257000 | 1.90635000  | -0.84126700 |

SCF: E(RHF) = -1135.47360824  
Sum of electronic and zero-point  
Energies= -1135.038056  
Sum of electronic and thermal  
Energies= -1135.015641  
Sum of electronic and thermal  
Enthalpies= -1135.014697  
Sum of electronic and thermal  
Free Energies= -1135.092233

**(S)-TS<sub>HF-f</sub>**

|   |             |             |             |
|---|-------------|-------------|-------------|
| C | -0.43331000 | 1.73760600  | -0.88557500 |
| O | 0.50673400  | 0.49827900  | -0.03350100 |
| C | 1.50207800  | 0.99951000  | 0.87501100  |
| O | -0.57710800 | 2.71530500  | -0.12727400 |
| C | 0.41119400  | 1.84034800  | -2.13877600 |
| O | -0.05127100 | -1.82070500 | -0.30072200 |
| C | 0.19674000  | -2.81632700 | 0.51954200  |
| O | 0.55161200  | -2.70226200 | 1.67921800  |
| C | -0.00997200 | -4.17927700 | -0.12137600 |
| H | 1.32485900  | 2.34882300  | -1.87126000 |
| H | -0.11875400 | 2.44489200  | -2.86659200 |

|   |             |             |             |
|---|-------------|-------------|-------------|
| H | 0.66079500  | 0.88244000  | -2.56023700 |
| H | -1.03929900 | -4.28072500 | -0.44747800 |
| H | 0.22958100  | -4.95781800 | 0.58511500  |
| H | 0.62120900  | -4.25982700 | -0.99796400 |
| H | 0.24287000  | -0.64317700 | -0.05187600 |
| N | -1.60555500 | 0.86935700  | -1.08201800 |
| C | -2.60878300 | 0.80354400  | -0.21640600 |
| C | -1.67160200 | -0.22745100 | -2.07827400 |
| C | -2.94739800 | 1.66475000  | 0.85334700  |
| N | -3.38955000 | -0.26772100 | -0.45524800 |
| C | -2.79776300 | -1.13114800 | -1.51996600 |
| H | -1.91056600 | 0.17558300  | -3.05070300 |

|   |             |             |             |                                  |                |             |             |
|---|-------------|-------------|-------------|----------------------------------|----------------|-------------|-------------|
| H | -0.75004000 | -0.77610300 | -2.08230300 | H                                | 6.10969400     | 1.60123100  | 0.78506400  |
| C | -4.05383400 | 1.37538300  | 1.58074300  | H                                | 4.53671200     | -1.62439100 | -1.49749900 |
| H | -2.29834100 | 2.48949200  | 1.02652000  | H                                | 6.46754000     | -0.31837400 | -0.71413500 |
| C | -4.49645200 | -0.55877300 | 0.27633300  | C                                | 1.22192300     | 0.46860200  | 2.29071200  |
| H | -3.54951900 | -1.38911800 | -2.24755800 | H                                | 1.18886000     | -0.61104700 | 2.28766400  |
| H | -2.35902600 | -1.99413400 | -1.05025400 | H                                | 0.26044500     | 0.84512400  | 2.62436200  |
| C | -4.86259900 | 0.24441100  | 1.29419400  | H                                | 1.98602500     | 0.80870900  | 2.97956100  |
| H | -4.32536300 | 2.01657100  | 2.39457600  | H                                | 1.38749400     | 2.07430300  | 0.87071700  |
| H | -5.03040100 | -1.44066300 | -0.00477800 |                                  |                |             |             |
| H | -5.73243800 | 0.02607600  | 1.87400400  | SCF: E(RHF) =                    | -1135.46923666 |             |             |
| C | 2.89875600  | 0.62672000  | 0.40445700  | Sum of electronic and zero-point |                |             |             |
| C | 3.99291400  | 1.36044800  | 0.83950400  | Energies=                        | -1135.034122   |             |             |
| C | 3.10634200  | -0.44748200 | -0.44600100 | Sum of electronic and thermal    |                |             |             |
| C | 5.27392600  | 1.02365600  | 0.44123400  | Energies=                        | -1135.011607   |             |             |
| H | 3.84204700  | 2.20139100  | 1.49009300  | Sum of electronic and thermal    |                |             |             |
| C | 4.38796300  | -0.78690600 | -0.84388000 | Enthalpies=                      | -1135.010663   |             |             |
| H | 2.26581900  | -1.01473100 | -0.78443100 | Sum of electronic and thermal    |                |             |             |
| C | 5.47584200  | -0.05443300 | -0.40340700 | Free Energies=                   | -1135.088984   |             |             |

(c) Transition state geometries of N-Acetyl-(R)-CF<sub>3</sub>-PIP<sup>+</sup> AcO<sup>-</sup> and N-Propionyl-(R)-CF<sub>3</sub>-PIP<sup>+</sup> EtCO<sub>2</sub><sup>-</sup> with (R)- and (S)-1-phenylethanol at B3LYP/6-31G\* level of theory

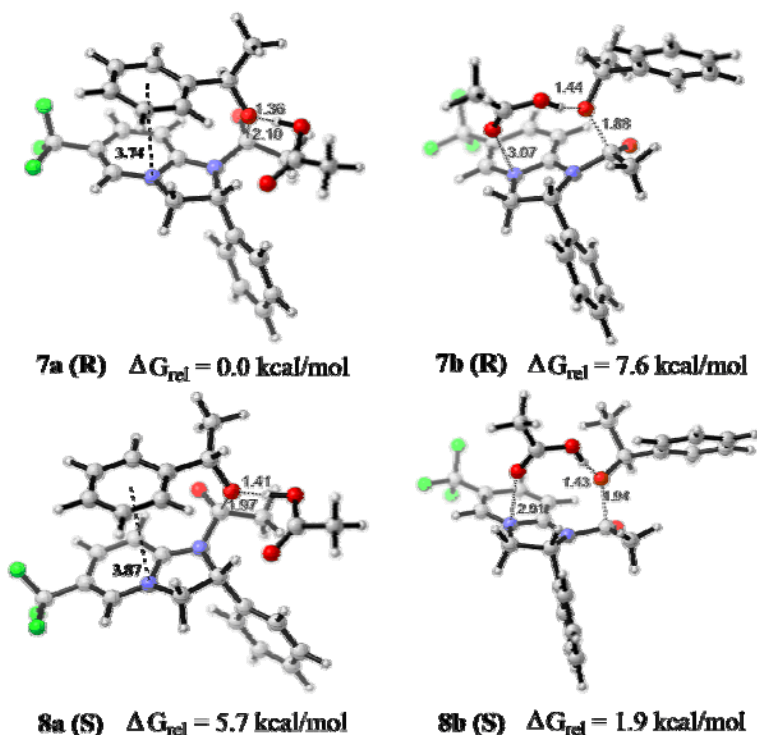

Figure S-7. TS of Ac-CF<sub>3</sub>-PIP acetate and 1-phenylethanol

C1. The lowest-energy stacked and splayed conformers of (R)-TS<sub>HF</sub> (structures (R)-TS<sub>HF</sub>.a and (R)-TS<sub>HF</sub>.h, respectively) and the lowest-energy stacked and splayed conformers of (S)-TS<sub>HF</sub> (structures (S)-TS<sub>HF</sub>.a and (S)-TS<sub>HF</sub>.c, respectively), obtained as described in the preceding section, were transformed into (R)-CF<sub>3</sub>-PIP derivatives by attaching a trifluoromethyl group at C6 and a phenyl group to the  $\alpha$ -face of C2. The resulting structures 7a, 7b, 8a, and 8b were optimized at B3LYP/6-31G\* level of theory (Figure S-7).

**7a**

|   |             |             |             |
|---|-------------|-------------|-------------|
| C | 1.22172300  | -0.08562300 | -2.16872300 |
| O | 1.40547200  | 1.66425700  | -1.02803700 |
| C | 0.36668800  | 2.55304800  | -1.30250200 |
| O | 0.50007500  | 0.16743400  | -3.12131200 |
| C | 2.71584700  | -0.26472000 | -2.28734100 |
| O | 3.51382000  | 2.56000400  | -0.11778500 |
| C | 3.86119000  | 2.01956200  | 1.02159500  |
| O | 3.24256600  | 1.12161800  | 1.60372500  |
| C | 5.13900100  | 2.60688200  | 1.59580400  |
| H | 3.07383500  | 0.48996500  | -2.98831800 |
| H | 2.92236500  | -1.26054700 | -2.69991200 |
| H | 3.24852200  | -0.15612000 | -1.34369400 |
| H | 5.95957600  | 2.48225400  | 0.88103400  |
| H | 5.39078800  | 2.11974000  | 2.53933600  |
| H | 5.01362900  | 3.68326400  | 1.75502500  |
| H | 2.56792400  | 2.16060800  | -0.51399100 |
| N | 0.59882900  | -0.79730700 | -1.02005000 |
| C | -0.73081900 | -0.88541600 | -0.88146800 |
| C | 1.29179000  | -0.98975800 | 0.28268300  |
| C | -1.76898400 | -0.83901600 | -1.84974500 |
| N | -1.07894100 | -1.07023200 | 0.43156900  |
| C | 0.11761100  | -1.03778700 | 1.29978200  |
| H | 1.89036500  | -0.09990900 | 0.48880000  |
| C | -3.06870500 | -0.95643300 | -1.42331600 |
| H | -1.49512800 | -0.69173000 | -2.88285700 |
| C | -2.35703400 | -1.17780500 | 0.85679300  |
| H | 0.14253700  | -1.93198900 | 1.92597200  |
| H | 0.07300900  | -0.13953900 | 1.91955700  |
| C | -3.38342400 | -1.12266600 | -0.04995400 |
| H | -3.87489800 | -0.92618700 | -2.14975000 |
| H | -2.50599400 | -1.29786100 | 1.92204100  |
| C | -0.67356700 | 2.58109400  | -0.17459900 |
| C | -2.04379400 | 2.66713200  | -0.45268600 |
| C | -0.27246500 | 2.51762700  | 1.16889900  |
| C | -2.99260000 | 2.68855700  | 0.57378600  |

**7b**

|   |             |             |             |
|---|-------------|-------------|-------------|
| C | -1.17952000 | -0.34495300 | 1.17291700  |
| O | -1.23260900 | 1.04727700  | -0.08619600 |
| C | -1.94405900 | 2.25787700  | 0.16862900  |
| O | -1.09808100 | 0.10428300  | 2.31338800  |
| C | -2.36296000 | -1.17459000 | 0.70867900  |
| O | -1.38259900 | 0.90570300  | -2.57462500 |
| C | -0.25276100 | 0.73386900  | -3.22731300 |
| O | 0.80574900  | 0.37018900  | -2.71742600 |
| C | -0.37966400 | 1.03587600  | -4.70894700 |
| H | -3.26676400 | -0.64775800 | 1.01287000  |
| H | -2.33952600 | -2.14700400 | 1.21303500  |
| H | -2.39565500 | -1.32525100 | -0.37144600 |
| H | -1.25329200 | 0.52679300  | -5.12787700 |
| H | 0.52562600  | 0.73121800  | -5.23671100 |
| H | -0.53607000 | 2.11158200  | -4.84903200 |
| H | -1.26270500 | 0.86405300  | -1.50916500 |
| N | 0.14850200  | -0.87607500 | 0.58557900  |
| C | 1.26229700  | -0.15124700 | 0.69513900  |
| C | 0.27204100  | -1.86837300 | -0.50789600 |
| C | 1.56244700  | 0.93554700  | 1.55993300  |
| N | 2.23366900  | -0.57753800 | -0.16918700 |
| C | 1.75802400  | -1.72878000 | -0.95569200 |
| H | -0.37162800 | -1.55546900 | -1.33330400 |
| C | 2.79463000  | 1.52781500  | 1.46137300  |
| H | 0.80014000  | 1.23854500  | 2.26168000  |
| C | 3.44818600  | 0.00607600  | -0.27710600 |
| H | 2.34817500  | -2.61108900 | -0.69231700 |
| H | 1.84180700  | -1.49671800 | -2.01635700 |
| C | 3.76312200  | 1.06994300  | 0.52658700  |
| H | 3.04003900  | 2.36509000  | 2.10759100  |

|   |             |             |             |
|---|-------------|-------------|-------------|
| H | -2.37213700 | 2.71241800  | -1.48975600 |
| C | -1.21514500 | 2.55083600  | 2.19928900  |
| H | 0.78524100  | 2.42249900  | 1.39863000  |
| C | -2.58051800 | 2.63166400  | 1.90648900  |
| H | -4.05176100 | 2.73933200  | 0.33271100  |
| H | -0.88310300 | 2.51723200  | 3.23502500  |
| H | -3.31399100 | 2.65488200  | 2.70879500  |
| C | 0.89361000  | 3.97390300  | -1.58964000 |
| H | 1.60151200  | 3.93764300  | -2.42467200 |
| H | 1.41643100  | 4.37782100  | -0.71578300 |
| H | 0.07643600  | 4.65743200  | -1.84983800 |
| H | -0.15205400 | 2.21029300  | -2.21780600 |
| C | 2.16081100  | -2.23538300 | 0.32696500  |
| C | 3.33800200  | -2.20089100 | 1.08704700  |
| C | 1.79778400  | -3.42279100 | -0.32093500 |
| C | 4.13158200  | -3.34357500 | 1.20243500  |
| H | 3.62755300  | -1.27262300 | 1.57374500  |
| C | 2.59647700  | -4.56144700 | -0.20883500 |
| H | 0.89909000  | -3.45536600 | -0.93188500 |
| C | 3.76405400  | -4.52513000 | 0.55625200  |
| H | 5.04432200  | -3.30623600 | 1.79117000  |
| H | 2.30866700  | -5.47522500 | -0.72206100 |
| H | 4.38684400  | -5.41151600 | 0.64220900  |
| C | -4.81269200 | -1.18544600 | 0.40105300  |
| F | -4.91140100 | -1.52347800 | 1.70405700  |
| F | -5.51046200 | -2.09181100 | -0.31735400 |
| F | -5.43289400 | 0.00275900  | 0.23864400  |

SCF: E(RB+HF-LYP) = -1716.95496628  
Sum of electronic and zero-point Energies= -1716.465171  
Sum of electronic and thermal Energies= -1716.432162  
Sum of electronic and thermal Enthalpies= -1716.431218  
Sum of electronic and thermal Free Energies= -1716.533805

|   |             |             |             |
|---|-------------|-------------|-------------|
| H | 4.12194400  | -0.40708700 | -1.01651900 |
| C | -3.44879900 | 2.06016700  | 0.36987800  |
| C | -4.29947200 | 2.13894900  | -0.74138600 |
| C | -4.01947500 | 1.79907800  | 1.62434000  |
| C | -5.67897600 | 1.97195900  | -0.60967800 |
| H | -3.86871600 | 2.32727900  | -1.72255100 |
| C | -5.39894200 | 1.63023400  | 1.76077900  |
| H | -3.37881000 | 1.70342000  | 2.49548100  |
| C | -6.23485300 | 1.72040100  | 0.64557900  |
| H | -6.31898400 | 2.04306700  | -1.48599900 |
| H | -5.82210600 | 1.42943700  | 2.74224900  |
| H | -7.30939200 | 1.59590600  | 0.75470000  |
| C | -1.29296700 | 3.09623500  | 1.27835400  |
| H | -0.24380300 | 3.27985700  | 1.02228000  |
| H | -1.32684800 | 2.59009100  | 2.24518800  |
| H | -1.79773800 | 4.06544500  | 1.37184400  |
| H | -1.84584200 | 2.84216200  | -0.76057100 |
| C | -0.06132800 | -3.29127900 | -0.09183800 |
| C | -0.62188300 | -4.16672500 | -1.02824700 |
| C | 0.24194700  | -3.76703400 | 1.19004100  |
| C | -0.86796700 | -5.49965200 | -0.69452300 |
| H | -0.87302100 | -3.80269900 | -2.02215600 |
| C | -0.01081100 | -5.09698200 | 1.52634800  |
| H | 0.65172500  | -3.08742900 | 1.93221000  |
| C | -0.56213400 | -5.96791400 | 0.58395000  |
| H | -1.30673700 | -6.16781300 | -1.43048500 |
| H | 0.21868800  | -5.45164400 | 2.52752700  |
| H | -0.75961600 | -7.00322800 | 0.84785300  |
| C | 5.10507100  | 1.73288300  | 0.44213100  |
| F | 5.78466500  | 1.61258300  | 1.60494600  |
| F | 4.98671200  | 3.05461500  | 0.19725200  |
| F | 5.86941000  | 1.19820800  | -0.53420600 |

SCF: E(RB+HF-LYP) = -1716.94201550  
 Sum of electronic and zero-point  
 Energies= -1716.451349  
 Sum of electronic and thermal

Energies= -1716.418392  
 Sum of electronic and thermal  
 Enthalpies= -1716.417448  
 Sum of electronic and thermal  
 Free Energies= -1716.521745

**8a**

|   |             |             |             |
|---|-------------|-------------|-------------|
| C | 1.09911100  | 0.31842000  | -2.00114400 |
| O | 1.90713200  | 1.62241100  | -0.75796000 |
| C | 1.40158400  | 2.93932300  | -0.66978600 |
| O | 0.35396400  | 0.85776500  | -2.81028700 |
| C | 2.44093500  | -0.26639800 | -2.39059900 |
| O | 4.19361100  | 1.66188100  | 0.20962900  |
| C | 4.27779800  | 1.09663800  | 1.39176500  |
| O | 3.36980600  | 0.47648000  | 1.94994800  |
| C | 5.64267500  | 1.27277600  | 2.03195000  |
| H | 2.93953800  | 0.46198800  | -3.03125100 |
| H | 2.26932300  | -1.18564000 | -2.96454500 |
| H | 3.08471700  | -0.49453000 | -1.54145200 |
| H | 6.41682500  | 0.85886900  | 1.37688500  |
| H | 5.67214600  | 0.77606200  | 3.00304600  |
| H | 5.86146800  | 2.33910700  | 2.15295800  |
| H | 3.20443100  | 1.58798700  | -0.21343300 |
| N | 0.41324200  | -0.45050100 | -0.89807300 |
| C | -0.91294100 | -0.48051400 | -0.75114400 |
| C | 1.09697300  | -0.99952500 | 0.30164900  |
| C | -1.96344000 | -0.19292200 | -1.66753900 |
| N | -1.25818500 | -0.90689800 | 0.50937900  |
| C | -0.04775100 | -1.03926800 | 1.34831600  |
| H | 1.85096100  | -0.28347000 | 0.63274200  |
| C | -3.25888900 | -0.38162200 | -1.26000400 |
| H | -1.69446500 | 0.16786700  | -2.64824900 |
| C | -2.53475100 | -1.08852600 | 0.91573500  |
| H | -0.07644200 | -1.97526600 | 1.90830400  |
| H | -0.00736400 | -0.18736200 | 2.03165700  |
| C | -3.56649900 | -0.84134900 | 0.04930900  |
| H | -4.07097500 | -0.17931300 | -1.95161700 |
| H | -2.67687500 | -1.42780600 | 1.93387800  |
| C | 0.04033600  | 2.95681100  | 0.03477800  |
| C | -1.16036000 | 3.30534700  | -0.59237600 |
| C | -0.00238800 | 2.60218800  | 1.39420400  |
| C | -2.36897800 | 3.30129000  | 0.11294700  |
| H | -1.15716900 | 3.58552600  | -1.64104400 |

|   |             |             |             |
|---|-------------|-------------|-------------|
| C | -1.20313600 | 2.60122800  | 2.10373600  |
| H | 0.92679100  | 2.32942400  | 1.89131300  |
| C | -2.39711900 | 2.95022100  | 1.46223300  |
| H | -3.28902200 | 3.58163700  | -0.39489300 |
| H | -1.20770500 | 2.34749500  | 3.16201300  |
| H | -3.33439700 | 2.96121900  | 2.01316300  |
| C | 1.44643300  | 3.68329100  | -2.01198500 |
| H | 0.82072700  | 3.20107700  | -2.76533400 |
| H | 2.47816200  | 3.67390900  | -2.37885600 |
| H | 1.13514300  | 4.72918200  | -1.89662400 |
| H | 2.08424600  | 3.48160300  | 0.00960800  |
| C | 1.72354300  | -2.36755700 | 0.07609200  |
| C | 2.87243700  | -2.69909800 | 0.80760700  |
| C | 1.16114300  | -3.32075000 | -0.78169200 |
| C | 3.44145900  | -3.96778600 | 0.68641500  |
| H | 3.31627000  | -1.95352900 | 1.46270900  |
| C | 1.73510100  | -4.58691100 | -0.90527500 |
| H | 0.28308800  | -3.07121200 | -1.37189000 |
| C | 2.87513800  | -4.91461800 | -0.16903600 |
| H | 4.33465800  | -4.21265400 | 1.25505800  |
| H | 1.29307700  | -5.31566700 | -1.57961500 |
| H | 3.32281200  | -5.89993000 | -0.26701800 |
| C | -4.99214000 | -1.05310400 | 0.46230600  |
| F | -5.58907000 | -1.99251700 | -0.30427600 |
| F | -5.08768700 | -1.45264700 | 1.74853100  |
| F | -5.71647700 | 0.07754100  | 0.32596000  |

SCF: E(RB+HF-LYP) = -1716.94617281  
 Sum of electronic and zero-point  
 Energies= -1716.455704  
 Sum of electronic and thermal  
 Energies= -1716.422755  
 Sum of electronic and thermal  
 Enthalpies= -1716.421811  
 Sum of electronic and thermal  
 Free Energies= -1716.524792

**8b**

|   |             |             |             |
|---|-------------|-------------|-------------|
| C | -1.09469100 | -0.60372600 | 1.32372900  |
| O | -1.33955400 | 0.89567300  | 0.11870500  |
| C | -2.02215800 | 1.95099000  | 0.75258200  |
| O | -0.99138400 | -0.16073000 | 2.46395900  |
| C | -2.28818700 | -1.42550800 | 0.88110200  |
| O | -1.22502800 | 1.22765600  | -2.35349500 |
| C | -0.08657900 | 1.00776000  | -2.97017000 |
| O | 0.89939700  | 0.47621800  | -2.46021000 |
| C | -0.09775900 | 1.48193200  | -4.41143900 |
| H | -3.17877200 | -0.89483500 | 1.22014600  |
| H | -2.25927700 | -2.40771700 | 1.36690700  |
| H | -2.35273600 | -1.55551000 | -0.19988300 |
| H | -0.96908900 | 1.07684000  | -4.93594000 |
| H | 0.82046300  | 1.17912300  | -4.91742000 |
| H | -0.18644000 | 2.57373400  | -4.43716300 |
| H | -1.20628800 | 1.02697700  | -1.29527000 |
| N | 0.20729500  | -1.01241500 | 0.66046700  |
| C | 1.28404700  | -0.22697200 | 0.76350500  |
| C | 0.33409900  | -1.92668200 | -0.50040700 |
| C | 1.53600800  | 0.87241500  | 1.62616200  |
| N | 2.25773800  | -0.59264400 | -0.12276900 |
| C | 1.82256800  | -1.75281700 | -0.91869200 |
| H | -0.30270200 | -1.54849600 | -1.30430900 |
| C | 2.73542100  | 1.52827100  | 1.51197800  |

|   |             |             |             |
|---|-------------|-------------|-------------|
| H | 0.76941900  | 1.13555800  | 2.33990400  |
| C | 3.43654900  | 0.05448400  | -0.24848700 |
| H | 2.42716500  | -2.62205300 | -0.64314800 |
| H | 1.92399900  | -1.52096700 | -1.97752300 |
| C | 3.71161900  | 1.12502500  | 0.56175400  |
| H | 2.94475900  | 2.37734400  | 2.15542200  |
| H | 4.11536600  | -0.31374100 | -1.00658400 |
| H | -1.82349400 | 1.86900200  | 1.83345200  |
| C | -1.46389100 | 3.30492700  | 0.27420100  |
| H | -0.38203300 | 3.34293900  | 0.44768700  |
| H | -1.93477600 | 4.13720700  | 0.81071300  |
| H | -1.64372900 | 3.44411300  | -0.79726600 |
| C | -3.54258300 | 1.89561600  | 0.57546000  |
| C | -4.38581900 | 2.12000700  | 1.67109600  |
| C | -4.12871500 | 1.64752800  | -0.67462900 |
| C | -5.77537100 | 2.10752200  | 1.52866600  |
| H | -3.94648800 | 2.30068500  | 2.65028800  |
| C | -5.51609100 | 1.63251800  | -0.82076000 |
| H | -3.49375600 | 1.46396200  | -1.53607600 |
| C | -6.34614000 | 1.86340100  | 0.27928800  |
| H | -6.40984500 | 2.28094600  | 2.39476400  |
| H | -5.95246000 | 1.43898600  | -1.79819500 |
| H | -7.42709800 | 1.84903100  | 0.16334300  |
| C | -0.00308200 | -3.37575600 | -0.19922000 |
| C | -0.63533400 | -4.15082900 | -1.17701600 |



|   |             |             |             |   |            |            |            |
|---|-------------|-------------|-------------|---|------------|------------|------------|
| C | 0.36301500  | -3.97325400 | 1.01365200  | F | 5.72286500 | 1.75258000 | 1.61233600 |
| C | -0.89290500 | -5.50428200 | -0.95213200 |   |            |            |            |
| H | -0.93377900 | -3.69207100 | -2.11710800 |   |            |            |            |
| C | 0.09893000  | -5.32342100 | 1.24205300  |   |            |            |            |
| H | 0.83300400  | -3.37341000 | 1.78862800  |   |            |            |            |
| C | -0.52632600 | -6.09339900 | 0.25832300  |   |            |            |            |
| H | -1.38767600 | -6.09375000 | -1.71909200 |   |            |            |            |
| H | 0.37714600  | -5.77327600 | 2.19120300  |   |            |            |            |
| H | -0.73294700 | -7.14475800 | 0.43821300  |   |            |            |            |
| C | 5.01816800  | 1.85416700  | 0.46287100  |   |            |            |            |
| F | 5.78996300  | 1.36848300  | -0.53296400 |   |            |            |            |
| F | 4.83168600  | 3.17110500  | 0.23706600  |   |            |            |            |

SCF: E(RB+HF-LYP) = -1716.95065404  
Sum of electronic and zero-point  
Energies= -1716.460356  
Sum of electronic and thermal  
Energies= -1716.427306  
Sum of electronic and thermal  
Enthalpies= -1716.426362  
Sum of electronic and thermal  
Free Energies= -1716.530767

**C2.** The optimized TS structures of N-Acetyl-(R)-CF<sub>3</sub>-PIP Acetate with (R)- and (S)-1-phenylethanol, **7a** and **8b**, respectively, obtained as described above, were transformed into the analogous TS structures of N-Propionyl-(R)-CF<sub>3</sub>-PIP Propionate, **9a** and **10b**, respectively, and re-optimized at B3LYP/6-31G\* level of theory.

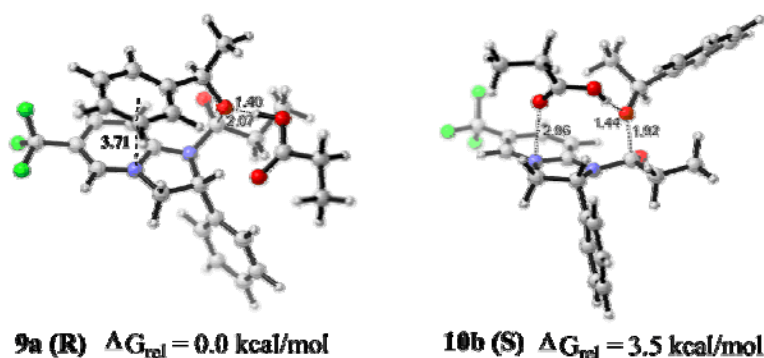

**Figure S-8.** TS of EtCO-CF<sub>3</sub>-PIP propionate and 1-phenylethanol

|               |             |             |             |   |             |             |             |
|---------------|-------------|-------------|-------------|---|-------------|-------------|-------------|
| <b>9a (R)</b> |             |             |             | C | -0.71975200 | 2.53891600  | -0.17693300 |
| C             | 0.88380300  | -0.30262000 | -2.16432000 | C | -2.09301100 | 2.72497500  | -0.38387800 |
| O             | 1.23932400  | 1.44568700  | -1.10704200 | C | -0.24895100 | 2.49387100  | 1.14435400  |
| C             | 0.24892200  | 2.39459000  | -1.35789400 | C | -2.97731400 | 2.85815200  | 0.69050500  |
| O             | 0.16164200  | -0.02011100 | -3.10916500 | H | -2.47524000 | 2.76001800  | -1.40270100 |
| C             | 2.35215000  | -0.65846800 | -2.30811900 | C | -1.12591200 | 2.63863400  | 2.22211800  |
| O             | 3.45626800  | 2.21616200  | -0.30443500 | H | 0.81006900  | 2.32731900  | 1.32096400  |
| C             | 3.83015600  | 1.67002600  | 0.82748500  | C | -2.49545000 | 2.81560200  | 2.00038700  |
| O             | 3.17662300  | 0.83690700  | 1.46241500  | H | -4.04147900 | 2.98295600  | 0.50503900  |
| C             | 5.18438900  | 2.17672600  | 1.30909800  | H | -0.73889400 | 2.61695700  | 3.23886100  |
| H             | 2.87953700  | -0.53784900 | -1.36027400 | H | -3.17793500 | 2.92589800  | 2.83959200  |
| H             | 2.38641300  | -1.72993700 | -2.55695000 | C | 0.85367500  | 3.76422200  | -1.72973900 |
| H             | 5.10018400  | 3.26508400  | 1.42756400  | H | 1.49876300  | 3.65264300  | -2.60795400 |
| H             | 5.90085100  | 2.03087700  | 0.49059700  | H | 1.46050600  | 4.15767800  | -0.90678100 |
| H             | 2.47939400  | 1.87917300  | -0.63234500 | H | 0.07062100  | 4.49645500  | -1.96113800 |
| N             | 0.21977800  | -0.92741700 | -0.97771100 | H | -0.34350100 | 2.05775100  | -2.22918500 |
| C             | -1.10960300 | -0.89971300 | -0.82076500 | C | 1.66823000  | -2.44907000 | 0.40736700  |
| C             | 0.91168300  | -1.13338400 | 0.32431300  | C | 2.87006700  | -2.48582100 | 1.12695300  |
| C             | -2.15456500 | -0.80501400 | -1.77931400 | C | 1.17282600  | -3.63003100 | -0.16028800 |
| N             | -1.45514300 | -1.00529700 | 0.50229000  | C | 3.55776400  | -3.69094300 | 1.28211000  |
| C             | -0.24894100 | -1.04824800 | 1.35558800  | H | 3.26255300  | -1.56470200 | 1.55060000  |
| H             | 1.58892500  | -0.29291300 | 0.48791000  | C | 1.86556300  | -4.83163000 | -0.00870900 |
| C             | -3.45325600 | -0.79184800 | -1.33517200 | H | 0.25270100  | -3.61077200 | -0.73924900 |
| H             | -1.88419200 | -0.72635900 | -2.82082400 | C | 3.05853500  | -4.86525600 | 0.71644700  |
| C             | -2.73174400 | -0.98314900 | 0.94475900  | H | 4.49074000  | -3.70892600 | 1.83917900  |
| H             | -0.29105600 | -1.92239500 | 2.00864700  | H | 1.47541800  | -5.74021000 | -0.45980000 |
| H             | -0.21051400 | -0.13164700 | 1.94796400  | H | 3.59864400  | -5.80094500 | 0.83350400  |
| C             | -3.76202900 | -0.87281300 | 0.04763200  | C | -5.18334500 | -0.78153200 | 0.51793800  |
| H             | -4.26395700 | -0.72281600 | -2.05386600 | F | -5.29650200 | -1.08385500 | 1.82858000  |
| H             | -2.87570700 | -1.04800300 | 2.01548900  | F | -5.98116400 | -1.62381900 | -0.17345200 |

|   |             |             |             |
|---|-------------|-------------|-------------|
| F | -5.68203200 | 0.46130900  | 0.34164200  |
| C | 5.66963900  | 1.51827300  | 2.59846600  |
| H | 4.95042400  | 1.66742600  | 3.40955200  |
| H | 6.63316400  | 1.93766900  | 2.90852000  |
| H | 5.79309400  | 0.43836800  | 2.46742600  |
| C | 3.02617200  | 0.16158300  | -3.40743700 |
| H | 2.48135600  | 0.06852700  | -4.35099100 |
| H | 4.05452800  | -0.18299500 | -3.55970300 |
| H | 3.05036000  | 1.21659500  | -3.12452300 |

```

SCF: E(RB+HF-LYP) = -1795.58452550
Sum of electronic and zero-point
Energies= -1795.036948
Sum of electronic and thermal
Energies= -1795.001259
Sum of electronic and thermal
Enthalpies= -1795.000315
Sum of electronic and thermal
Free Energies= -1795.109207

```

### 10b (S)

|   |             |             |             |
|---|-------------|-------------|-------------|
| C | -1.01837700 | -0.84723800 | 1.48109400  |
| O | -1.60100200 | 0.41493500  | 0.16229300  |
| C | -2.09813100 | 1.60129500  | 0.73093500  |
| O | -0.98726700 | -0.29062200 | 2.57599600  |
| C | -2.00093800 | -1.96954600 | 1.16871700  |
| O | -1.39766600 | 0.52383000  | -2.32700300 |
| C | -0.22708100 | 0.80327200  | -2.86311000 |
| O | 0.84230100  | 0.79373900  | -2.25495500 |
| C | -0.32809100 | 1.14814100  | -4.34284500 |
| H | -2.10651200 | -2.10363700 | 0.08938800  |
| H | -1.56873600 | -2.89477100 | 1.57322500  |
| H | -0.97865100 | 0.40455600  | -4.81924000 |
| H | -0.87552300 | 2.09802200  | -4.41258700 |
| H | -1.38536400 | 0.46737600  | -1.25594800 |
| N | 0.34999100  | -1.07360800 | 0.82629100  |
| C | 1.33288200  | -0.17870200 | 0.98097700  |
| C | 0.57190000  | -1.88530300 | -0.39963100 |
| C | 1.49442700  | 0.85738100  | 1.94086300  |
| N | 2.31632500  | -0.34147800 | 0.04307000  |
| C | 1.99918300  | -1.46342800 | -0.85438100 |
| H | -0.15622900 | -1.56809200 | -1.15007500 |
| C | 2.60908000  | 1.65442000  | 1.86506700  |
| H | 0.72209000  | 0.97194700  | 2.68665500  |
| C | 3.41120000  | 0.44388300  | -0.04253600 |
| H | 2.72790300  | -2.26383000 | -0.69736600 |
| H | 2.01742000  | -1.11144000 | -1.88446600 |
| C | 3.59299100  | 1.45835300  | 0.86082800  |
| H | 2.74297800  | 2.45417500  | 2.58717900  |
| H | 4.10276400  | 0.22635700  | -0.84595400 |
| H | -1.89521500 | 1.55646700  | 1.81323300  |
| C | -1.36665200 | 2.83559700  | 0.16358300  |
| H | -0.28399500 | 2.72496200  | 0.29082100  |
| H | -1.68921600 | 3.75290400  | 0.67040300  |
| H | -1.57582300 | 2.95217400  | -0.90556800 |
| C | -3.61049100 | 1.76701000  | 0.56154600  |
| C | -4.36615600 | 2.37793300  | 1.57082600  |
| C | -4.26778600 | 1.36110600  | -0.60810500 |
| C | -5.73799000 | 2.58754100  | 1.41953400  |
| H | -3.87260700 | 2.68762700  | 2.49036300  |

|   |             |             |             |
|---|-------------|-------------|-------------|
| C | -5.63984300 | 1.56659300  | -0.76224700 |
| H | -3.69998700 | 0.88055200  | -1.39861500 |
| C | -6.38101700 | 2.18170700  | 0.24907000  |
| H | -6.30491100 | 3.05958800  | 2.21862400  |
| H | -6.13282600 | 1.24376600  | -1.67652300 |
| H | -7.45002600 | 2.33861400  | 0.12804100  |
| C | 0.48176400  | -3.38778800 | -0.19463500 |
| C | -0.12256400 | -4.17935800 | -1.17633400 |
| C | 1.05437200  | -4.00798100 | 0.92348600  |
| C | -0.15293900 | -5.56934400 | -1.04786000 |
| H | -0.57892700 | -3.70587300 | -2.04270900 |
| C | 1.01803800  | -5.39551100 | 1.05656900  |
| H | 1.50898700  | -3.40154000 | 1.70286000  |
| C | 0.41683100  | -6.18039500 | 0.06927700  |
| H | -0.62924400 | -6.17137300 | -1.81673100 |
| H | 1.45538800  | -5.86415700 | 1.93395200  |
| H | 0.38791000  | -7.26132700 | 0.17466500  |
| C | 4.79891400  | 2.34742200  | 0.79396200  |
| F | 5.63451600  | 1.98417400  | -0.20248300 |
| F | 4.45248500  | 3.63541400  | 0.59304300  |
| F | 5.49749100  | 2.30758900  | 1.95061300  |
| C | 1.02459000  | 1.24778100  | -5.04458000 |
| H | 1.66310200  | 1.98946000  | -4.55604800 |
| H | 0.89706400  | 1.53596200  | -6.09354000 |
| H | 1.55577200  | 0.28997700  | -5.01842900 |
| C | -3.36411000 | -1.72106600 | 1.81364900  |
| H | -3.25453500 | -1.55677100 | 2.88921100  |
| H | -4.01707500 | -2.58661100 | 1.65592300  |
| H | -3.84556700 | -0.84174800 | 1.38021300  |

```

SCF: E(RB+HF-LYP) = -1795.57744074
Sum of electronic and zero-point
Energies= -1795.029728
Sum of electronic and thermal
Energies= -1794.993985
Sum of electronic and thermal
Enthalpies= -1794.993041
Sum of electronic and thermal
Free Energies= -1795.103606

```

**C3.** The geometries of the transition states of (R)- and (S)-1-phenylethanol approaching N-acetyl-(R)-CF<sub>3</sub>-PIP acetate from the  $\alpha$ -face were optimized at B3LYP/6-31G\* level.

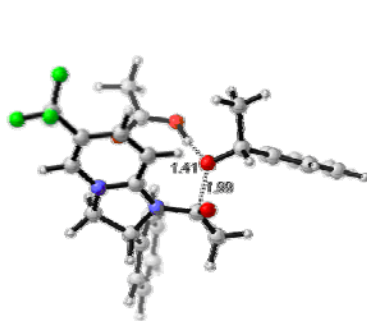

**11 (R)**  $\Delta G_{rel} = 6.6$  kcal/mol

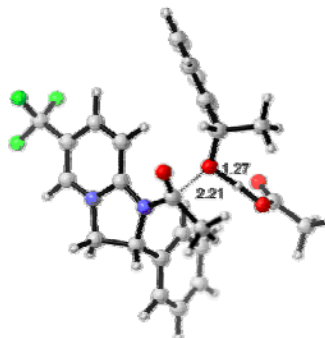

**12 (S)**  $\Delta G_{rel} = 10.1$  kcal/mol

**Figure S-9.** Substrate approaching N-acetyl-(R)-CF<sub>3</sub>-PIP acetate from the  $\alpha$ -face

**11 (R)**

|   |             |             |             |
|---|-------------|-------------|-------------|
| C | 0.88845700  | -0.01791200 | -1.87078400 |
| O | 1.21415200  | -1.01694800 | -0.18264600 |
| C | 1.87615700  | -2.23042900 | -0.43026800 |
| O | 0.56487800  | -0.84048200 | -2.71802800 |
| C | 2.20110300  | 0.72968200  | -1.93279200 |
| O | 0.71526600  | -0.70724700 | 2.23603800  |
| C | -0.41824700 | -0.17232800 | 2.63029200  |
| O | -1.23167900 | 0.38796100  | 1.89549600  |
| C | -0.64214800 | -0.30914900 | 4.12550700  |
| H | 2.95430700  | 0.01416000  | -2.26662000 |
| H | 2.13715300  | 1.52954800  | -2.68327700 |
| H | 2.50392000  | 1.14993500  | -0.97747100 |
| H | 0.24603800  | 0.01988700  | 4.67399900  |
| H | -1.51302900 | 0.27208000  | 4.43332600  |
| H | -0.80142300 | -1.36418000 | 4.37564800  |
| H | 0.85619100  | -0.77824900 | 1.16097500  |
| N | -0.24280800 | 0.74667600  | -1.21434800 |
| C | -1.40949900 | 0.13377700  | -0.99829700 |
| C | -0.42048000 | 2.22514000  | -1.15578300 |
| C | -1.75650300 | -1.23885400 | -1.10964600 |
| N | -2.38277700 | 1.02173700  | -0.63116000 |
| C | -1.78162200 | 2.34738700  | -0.42274900 |
| C | -3.03747800 | -1.61207300 | -0.79618500 |
| H | -1.00534100 | -1.93158600 | -1.45174300 |
| C | -3.63347800 | 0.65281600  | -0.27155100 |
| H | -2.41626000 | 3.13532200  | -0.83325700 |
| H | -1.63907900 | 2.48408700  | 0.65179800  |
| C | -4.00174000 | -0.66219400 | -0.36122600 |
| H | -3.32463000 | -2.65619800 | -0.87387600 |
| H | -4.29587000 | 1.43958400  | 0.06524900  |
| H | 1.71564700  | -2.48901800 | -1.49141100 |
| C | -5.39391200 | -1.09947300 | -0.01798700 |
| F | -6.02389800 | -1.62382800 | -1.09332900 |
| F | -5.38844100 | -2.05641000 | 0.93309400  |
| F | -6.14607700 | -0.07225600 | 0.43354700  |
| H | -0.52562000 | 2.58822700  | -2.18789100 |
| C | 0.65377700  | 3.04485200  | -0.46800200 |
| C | 1.05569800  | 4.25145900  | -1.05010800 |
| C | 1.19826100  | 2.66124700  | 0.76487900  |
| C | 1.98582700  | 5.07303700  | -0.41021000 |
| H | 0.64301000  | 4.55099000  | -2.01141800 |
| C | 2.13579900  | 3.47704600  | 1.39626800  |
| H | 0.91332200  | 1.71293200  | 1.20589200  |
| C | 2.52816000  | 4.68582600  | 0.81488100  |
| H | 2.29049800  | 6.00715100  | -0.87396800 |
| H | 2.56513900  | 3.16409200  | 2.34391700  |
| H | 3.25891000  | 5.31801800  | 1.31179900  |
| C | 3.38789100  | -2.14379500 | -0.20443900 |
| C | 4.27439800  | -2.81421200 | -1.05631900 |

|   |            |             |             |
|---|------------|-------------|-------------|
| C | 3.91798800 | -1.41840900 | 0.87132900  |
| C | 5.65369800 | -2.77144000 | -0.84045700 |
| H | 3.87879100 | -3.37346300 | -1.90254700 |
| C | 5.29493400 | -1.37366900 | 1.09147400  |
| H | 3.24226200 | -0.88687800 | 1.53488400  |
| C | 6.16943300 | -2.04980000 | 0.23682100  |
| H | 6.32419000 | -3.29603100 | -1.51727300 |
| H | 5.68854400 | -0.80708400 | 1.93252200  |
| H | 7.24251000 | -2.01093700 | 0.40726700  |
| C | 1.27443500 | -3.37166800 | 0.41582300  |
| H | 0.19940000 | -3.46089300 | 0.21781800  |
| H | 1.75167600 | -4.33010800 | 0.18000600  |
| H | 1.40818200 | -3.17529600 | 1.48469000  |

SCF: E(RB+HF-LYP) = -1716.94405748  
 Sum of electronic and zero-point  
 Energies= -1716.454481  
 Sum of electronic and thermal  
 Energies= -1716.421393  
 Sum of electronic and thermal  
 Enthalpies= -1716.420449  
 Sum of electronic and thermal  
 Free Energies= -1716.523277

**12 (S)**

|   |             |             |             |
|---|-------------|-------------|-------------|
| C | 0.97758200  | -0.19313800 | 2.49901400  |
| O | 1.38021000  | 1.19955100  | 0.83692700  |
| C | 0.98671700  | 2.50328300  | 1.18075600  |
| O | 0.27738500  | 0.47427700  | 3.23646400  |
| C | 2.43381400  | -0.50798200 | 2.72631800  |
| C | 3.68448700  | 1.01737900  | 0.08547400  |
| O | 3.90273200  | 1.15299200  | -1.19638300 |
| O | 3.03924900  | 1.34274900  | -2.05703200 |
| C | 5.37473500  | 1.02600800  | -1.57014300 |
| H | 2.89076400  | 0.37063900  | 3.18211500  |
| H | 2.52147500  | -1.34322300 | 3.43647000  |
| H | 2.96782100  | -0.74554500 | 1.80622100  |
| H | 5.71237000  | 0.00015600  | -1.37998900 |
| H | 5.52202000  | 1.26659600  | -2.62495800 |
| H | 5.98403000  | 1.68696400  | -0.94519100 |
| H | 2.56848300  | 1.13552400  | 0.38480000  |
| N | 0.27802800  | -1.16429100 | 1.61619300  |
| C | -0.95533900 | -0.93769500 | 1.14525200  |
| C | 0.72798700  | -2.53398800 | 1.25864000  |
| C | -1.70353700 | 0.25955500  | 1.06670900  |
| N | -1.50773400 | -2.09027200 | 0.65178600  |
| C | -0.63045000 | -3.23395800 | 0.96765700  |
| C | -2.92578700 | 0.22265500  | 0.44199100  |
| H | -1.28916300 | 1.16985100  | 1.46499100  |
| C | -2.71690300 | -2.13835500 | 0.04142100  |
| H | -1.03728700 | -3.75065800 | 1.84410500  |

|   |             |             |             |                                  |                |             |             |
|---|-------------|-------------|-------------|----------------------------------|----------------|-------------|-------------|
| H | -0.57076100 | -3.92057400 | 0.12314900  | F                                | -5.10398200    | -2.23564400 | -1.21821500 |
| C | -3.45037500 | -0.98797000 | -0.08528400 | H                                | 1.19293000     | -2.99417700 | 2.13422400  |
| H | -3.48750700 | 1.14481300  | 0.33002700  | C                                | 1.66594400     | -2.62781200 | 0.06306600  |
| H | -3.04337600 | -3.10380600 | -0.32310100 | C                                | 2.36089400     | -3.83350100 | -0.11817300 |
| C | -0.06029500 | 3.04892000  | 0.20566100  | C                                | 1.78084500     | -1.61210900 | -0.88909600 |
| C | 0.05014300  | 2.80038200  | -1.17076700 | C                                | 3.14274900     | -4.03150500 | -1.25373700 |
| C | -1.14554700 | 3.80530500  | 0.66856000  | H                                | 2.29232300     | -4.61996100 | 0.63237800  |
| C | -0.90864100 | 3.29839000  | -2.05457900 | C                                | 2.56896000     | -1.81374200 | -2.02714400 |
| H | 0.89593700  | 2.22322300  | -1.53853100 | H                                | 1.30492600     | -0.64851400 | -0.73173100 |
| C | -2.10920500 | 4.29999200  | -0.21583000 | C                                | 3.24123000     | -3.02090100 | -2.21452100 |
| H | -1.23754700 | 4.00973300  | 1.73480100  | C                                | 3.68083800     | -4.96676500 | -1.38333200 |
| C | -1.99386100 | 4.04386000  | -1.58347800 | H                                | 2.67354400     | -0.99853100 | -2.73510700 |
| H | -0.80786000 | 3.10384500  | -3.12001100 | H                                | 3.85533900     | -3.17068200 | -3.09845700 |
| H | -2.94382600 | 4.88615700  | 0.16284300  |                                  |                |             |             |
| H | -2.73909100 | 4.42656900  | -2.27679300 | SCF: E(RB+HF-LYP) =              | -1716.93703176 |             |             |
| C | 2.17366600  | 3.48185000  | 1.29329200  | Sum of electronic and zero-point |                |             |             |
| H | 2.91988200  | 3.09406000  | 1.99520400  | Energies=                        | -1716.448851   |             |             |
| H | 2.65859100  | 3.62344900  | 0.32245400  | Sum of electronic and thermal    |                |             |             |
| H | 1.83103200  | 4.45985700  | 1.65143900  | Energies=                        | -1716.415718   |             |             |
| H | 0.51253700  | 2.46177900  | 2.18045300  | Sum of electronic and thermal    |                |             |             |
| C | -4.79206400 | -1.00291600 | -0.76178100 | Enthalpies=                      | -1716.414774   |             |             |
| F | -5.76760100 | -0.62089000 | 0.08862700  | Sum of electronic and thermal    |                |             |             |
| F | -4.82254000 | -0.15415600 | -1.80635900 | Free Energies=                   | -1716.517683   |             |             |

#### (d) Comparison of performance of theoretical methods on a model system using DHIP as a surrogate for CF<sub>3</sub>-PIP

Calculations on a model system were carried out to compare the performance of theoretical methods. The goal was to find a method for the calculation of the real system with reasonable accuracy at a low computational cost. The unsubstituted DHIP was used as a surrogate for CF<sub>3</sub>-PIP. The relative free energies between the model conformers corresponding to **7a'**/**8b'** and **9a'**/**10b'** calculated at various theoretical levels are shown in Table S-2.

The predicted energy differences on the model system are very close at these theoretical levels. The more efficient B3LYP/6-31G(d)//B3LYP/6-31G(d) calculations have less than 1 kcal/mol deviation from the MP2/6-31G(d)//MP2/6-31G(d) results. Thus, B3LYP/6-31G(d)//B3LYP/6-31G(d) was employed to study the real system.

**Table S-2.** Comparison of theoretical methods on a model system

| Method                                           | $\Delta G_{298}$ ( <b>8b'</b> - <b>7a'</b> )<br>kcal/mol | $\Delta G_{298}$ ( <b>10b'</b> - <b>9a'</b> )<br>kcal/mol |
|--------------------------------------------------|----------------------------------------------------------|-----------------------------------------------------------|
| B3LYP/6-31G(d)//B3LYP/6-31G(d)                   | 2.0                                                      | 3.2                                                       |
| B3LYP/6-311+G(d)//B3LYP/6-31G(d) <sup>a</sup>    | 2.0                                                      | 3.5                                                       |
| B3LYP/6-311++G(d,p)//B3LYP/6-31G(d) <sup>a</sup> | 2.4                                                      | 3.8                                                       |
| M05-2X/6-31G(d)//B3LYP/6-31G(d) <sup>a</sup>     | 1.2                                                      | 2.5                                                       |
| MP2/6-31G(d)//B3LYP/6-31G(d) <sup>a</sup>        | 2.0                                                      | 3.3                                                       |
| SCS-MP2/6-31G(d)//B3LYP/6-31G(d) <sup>a</sup>    | 1.8                                                      | 3.2                                                       |
| M05-2X/6-31G(d)//M05-2X/6-31G(d)                 | 2.6                                                      | 3.2                                                       |
| MP2/6-31G(d)//MP2/6-31G(d) <sup>a</sup>          | 1.5                                                      | 3.8                                                       |

<sup>a</sup> Thermo correction is calculated at the B3LYP/6-31G(d) level.

**Table S-3.** Computed energies of **7a'**, **8b'**, **9a'**, and **10b'** at various levels.

**B3LYP/6-31G(d)//B3LYP/6-31G(d)**

|             | E (a.u.)     | $\Delta G(\text{thermo})$<br>(a.u.) | G (a.u.)     | $\Delta G_{\text{rel}}$<br>(kcal/mol) |
|-------------|--------------|-------------------------------------|--------------|---------------------------------------|
| <b>7a'</b>  | -1148.867719 | 0.346242                            | -1148.521477 | 0.0                                   |
| <b>8b'</b>  | -1148.866406 | 0.348074                            | -1148.518332 | 2.0                                   |
| <b>9a'</b>  | -1227.497518 | 0.400819                            | -1227.096699 | 0.0                                   |
| <b>10b'</b> | -1227.494576 | 0.402976                            | -1227.091600 | 3.2                                   |

**B3LYP/6-311+G(d)//B3LYP/6-31G(d)**

|             | E (a.u.)     | $\Delta G(\text{thermo})^a$<br>(a.u.) | G (a.u.)     | $\Delta G_{\text{rel}}$<br>(kcal/mol) |
|-------------|--------------|---------------------------------------|--------------|---------------------------------------|
| <b>7a'</b>  | -1149.155079 | 0.346242                              | -1148.808837 | 0.0                                   |
| <b>8b'</b>  | -1149.153798 | 0.348074                              | -1148.805724 | 2.0                                   |
| <b>9a'</b>  | -1227.798847 | 0.400819                              | -1227.398028 | 0.0                                   |
| <b>10b'</b> | -1227.795440 | 0.402976                              | -1227.392464 | 3.5                                   |

<sup>a</sup> Thermo correction is calculated at the B3LYP/6-31G(d) level.

**B3LYP/6-311++G(d,p)//B3LYP/6-31G(d)**

|             | E (a.u.)     | $\Delta G(\text{thermo})^a$<br>(a.u.) | G (a.u.)     | $\Delta G_{\text{rel}}$<br>(kcal/mol) |
|-------------|--------------|---------------------------------------|--------------|---------------------------------------|
| <b>7a'</b>  | -1149.196535 | 0.346242                              | -1148.850293 | 0.0                                   |
| <b>8b'</b>  | -1149.194529 | 0.348074                              | -1148.846454 | 2.4                                   |
| <b>9a'</b>  | -1227.845061 | 0.400819                              | -1227.444242 | 0.0                                   |
| <b>10b'</b> | -1227.841103 | 0.402976                              | -1227.438127 | 3.8                                   |

<sup>a</sup> Thermo correction is calculated at the B3LYP/6-31G(d) level.

**M05-2X/6-31G(d)//B3LYP/6-31G(d)**

|             | E (a.u.)     | $\Delta G(\text{thermo})^a$<br>(a.u.) | G (a.u.)     | $\Delta G_{\text{rel}}$<br>(kcal/mol) |
|-------------|--------------|---------------------------------------|--------------|---------------------------------------|
| <b>7a'</b>  | -1148.729316 | 0.346242                              | -1148.383074 | 0.0                                   |
| <b>8b'</b>  | -1148.729194 | 0.348074                              | -1148.381120 | 1.2                                   |
| <b>9a'</b>  | -1227.347336 | 0.400819                              | -1226.946517 | 0.0                                   |
| <b>10b'</b> | -1227.345562 | 0.402976                              | -1226.942586 | 2.5                                   |

<sup>a</sup> Thermo correction is calculated at the B3LYP/6-31G(d) level.

**MP2/6-31G(d)//B3LYP/6-31G(d)**

|             | E (a.u.)     | $\Delta G(\text{thermo})^a$<br>(a.u.) | G (a.u.)     | $\Delta G_{\text{rel}}$<br>(kcal/mol) |
|-------------|--------------|---------------------------------------|--------------|---------------------------------------|
| <b>7a'</b>  | -1145.287115 | 0.346242                              | -1144.940873 | 0.0                                   |
| <b>8b'</b>  | -1145.285770 | 0.348074                              | -1144.937696 | 2.0                                   |
| <b>9a'</b>  | -1223.623235 | 0.400819                              | -1223.222416 | 0.0                                   |
| <b>10b'</b> | -1223.620158 | 0.402976                              | -1223.217183 | 3.3                                   |

<sup>a</sup> Thermo correction is calculated at the B3LYP/6-31G(d) level.

**SCS-MP2/6-31G(d)//B3LYP/6-31G(d)**

|             | E (a.u.)     | $\Delta G(\text{thermo})^a$<br>(a.u.) | G (a.u.)     | $\Delta G_{\text{rel}}$<br>(kcal/mol) |
|-------------|--------------|---------------------------------------|--------------|---------------------------------------|
| <b>7a'</b>  | -1145.171268 | 0.346242                              | -1144.825026 | 0.0                                   |
| <b>8b'</b>  | -1145.170175 | 0.348074                              | -1144.822101 | 1.8                                   |
| <b>9a'</b>  | -1223.504613 | 0.400819                              | -1223.103794 | 0.0                                   |
| <b>10b'</b> | -1223.501605 | 0.402976                              | -1223.098629 | 3.2                                   |

<sup>a</sup> Thermo correction is calculated at the B3LYP/6-31G(d) level.

**M05-2X/6-31G(d)//M05-2X/6-31G(d)**

|             | E (a.u.)     | $\Delta G(\text{thermo})^a$<br>(a.u.) | G (a.u.)     | $\Delta G_{\text{rel}}$<br>(kcal/mol) |
|-------------|--------------|---------------------------------------|--------------|---------------------------------------|
| <b>7a'</b>  | -1148.867726 | 0.345179                              | -1148.522547 | 0.0                                   |
| <b>8b'</b>  | -1148.866406 | 0.348074                              | -1148.518332 | 2.6                                   |
| <b>9a'</b>  | -1227.497518 | 0.400819                              | -1227.096699 | 0.0                                   |
| <b>10b'</b> | -1227.494576 | 0.402965                              | -1227.091611 | 3.2                                   |

**MP2/6-31G(d)//MP2/6-31G(d)**

|             | E (a.u.)     | $\Delta G(\text{thermo})^a$<br>(a.u.) | G (a.u.)     | $\Delta G_{\text{rel}}$<br>(kcal/mol) |
|-------------|--------------|---------------------------------------|--------------|---------------------------------------|
| <b>7a'</b>  | -1145.295583 | 0.354370                              | -1144.941213 | 0.0                                   |
| <b>8b'</b>  | -1145.289336 | 0.350465                              | -1144.938871 | 1.5                                   |
| <b>9a'</b>  | -1223.629487 | 0.407364                              | -1223.222123 | 0.0                                   |
| <b>10b'</b> | -1223.623761 | 0.407665                              | -1223.216096 | 3.8                                   |

<sup>a</sup> Thermo correction is calculated at the B3LYP/6-31G(d) level.

## Optimized geometries at B3LYP/6-31G(d) level

### 7a' (optimized by B3LYP/6-31G(d))

|   |             |             |             |
|---|-------------|-------------|-------------|
| C | 0.26090000  | -2.09489800 | 1.22813800  |
| O | 1.27684300  | -0.26075300 | 0.99638100  |
| C | 0.67592200  | 0.74186100  | 1.75412400  |
| O | -0.40589800 | -2.02103100 | 2.25050200  |
| C | 1.53967500  | -2.89525400 | 1.13244700  |
| O | 3.59493800  | 0.05870400  | 0.26500700  |
| C | 3.73587100  | 0.11160800  | -1.03398900 |
| O | 2.83500000  | -0.06192700 | -1.86191400 |
| C | 5.16064500  | 0.41731300  | -1.46812700 |
| H | 2.07565200  | -2.76534600 | 2.07287800  |
| H | 1.28617500  | -3.95802800 | 1.01570400  |
| H | 2.18869800  | -2.58745500 | 0.31286400  |
| H | 5.84827900  | -0.31967900 | -1.03964200 |
| H | 5.23669300  | 0.40945100  | -2.55690700 |
| H | 5.46177700  | 1.39786900  | -1.08326000 |
| H | 2.53622700  | -0.08159000 | 0.58753000  |
| N | -0.43236600 | -1.90738600 | -0.05409100 |
| C | -1.69663500 | -1.46602300 | -0.15474900 |
| C | 0.26818800  | -1.80056000 | -1.35242500 |
| C | -2.74667700 | -1.43082800 | 0.79710900  |
| N | -1.95284000 | -1.00918000 | -1.42065800 |
| C | -0.71795600 | -1.01711400 | -2.23830900 |
| H | 1.20301400  | -1.24598900 | -1.24702400 |
| C | -3.97336200 | -0.94796100 | 0.40003200  |
| H | -2.53393600 | -1.77140800 | 1.79884600  |
| C | -3.15884000 | -0.52508200 | -1.80906500 |
| H | -0.91239200 | -1.49412500 | -3.20143800 |
| H | -0.39636700 | 0.01612600  | -2.39118800 |
| C | -4.20056400 | -0.48813600 | -0.91967200 |

|   |             |             |             |
|---|-------------|-------------|-------------|
| H | -4.78563700 | -0.92001100 | 1.12030500  |
| H | -3.22401800 | -0.18326300 | -2.83536900 |
| C | -0.14663600 | 1.70987200  | 0.89294700  |
| C | -1.29456100 | 2.32833000  | 1.40577700  |
| C | 0.23971700  | 2.01191000  | -0.42140500 |
| C | -2.03656400 | 3.22850400  | 0.63758700  |
| H | -1.61112600 | 2.09953200  | 2.42227300  |
| C | -0.49803100 | 2.91448600  | -1.19222300 |
| H | 1.11815500  | 1.52712800  | -0.83861200 |
| C | -1.64016400 | 3.52608900  | -0.66780500 |
| H | -2.92429400 | 3.69633000  | 1.05785700  |
| H | -0.17337700 | 3.14855000  | -2.20436100 |
| H | -2.21173000 | 4.23020800  | -1.26794000 |
| C | 1.71354600  | 1.51574600  | 2.59423300  |
| H | 2.25341400  | 0.81493400  | 3.24024000  |
| H | 2.44248300  | 2.01197000  | 1.94433800  |
| H | 1.23459000  | 2.27678200  | 3.22206100  |
| H | -0.02545400 | 0.26436600  | 2.46414300  |
| H | -5.16525800 | -0.10583700 | -1.22966400 |
| H | 0.46094800  | -2.80367400 | -1.74793600 |

SCF: E(RB+HF-LYP) = -1148.86771883  
 Sum of electronic and zero-point  
 Energies= -1148.463983  
 Sum of electronic and thermal  
 Energies= -1148.439172  
 Sum of electronic and thermal  
 Enthalpies= -1148.438228  
 Sum of electronic and thermal  
 Free Energies= -1148.521477

### 8b' (optimized by B3LYP/6-31G(d))

|   |             |             |             |
|---|-------------|-------------|-------------|
| C | 0.00228300  | -1.61860700 | 0.96735600  |
| O | -0.61865500 | -0.12234500 | -0.01435100 |
| C | -1.57323500 | -0.51455100 | -0.97007300 |
| O | -0.09174500 | -2.62712000 | 0.26441300  |
| C | -0.84989100 | -1.44177500 | 2.21416600  |
| O | -0.26515400 | 2.37005100  | -0.02912100 |
| C | 0.94807200  | 2.86717700  | -0.16047800 |
| O | 1.98780600  | 2.21615300  | -0.09332800 |
| C | 0.93692300  | 4.36395900  | -0.40726300 |
| H | -1.87369700 | -1.70563000 | 1.94575600  |
| H | -0.50531500 | -2.13718500 | 2.99167700  |
| H | -0.84841800 | -0.42328500 | 2.60605100  |
| H | 0.31985900  | 4.86741900  | 0.34375700  |
| H | 1.95420400  | 4.75829600  | -0.38569200 |
| H | 0.48583600  | 4.57006500  | -1.38436100 |
| H | -0.30790900 | 1.30848300  | -0.00584700 |
| N | 1.38570100  | -1.06568000 | 1.14750100  |
| C | 2.30582400  | -1.11913200 | 0.17468400  |
| C | 1.72483500  | -0.00041600 | 2.10705000  |
| C | 2.31994400  | -1.85081900 | -1.03890100 |
| N | 3.37890600  | -0.32488500 | 0.46852000  |
| C | 3.19063900  | 0.34217600  | 1.77127700  |
| H | 1.07235800  | 0.86029600  | 1.94837300  |
| C | 3.40521200  | -1.70594800 | -1.87292800 |
| H | 1.46971500  | -2.48355500 | -1.24830400 |
| C | 4.44375400  | -0.17393100 | -0.35546500 |
| H | 3.90034600  | -0.07966800 | 2.49085200  |
| H | 3.34912300  | 1.41303100  | 1.65231300  |
| C | 4.49105600  | -0.85854400 | -1.54164800 |

|   |             |             |             |
|---|-------------|-------------|-------------|
| H | 3.42450800  | -2.25202500 | -2.81161800 |
| H | 5.21452800  | 0.50734100  | -0.01541100 |
| H | -1.44386100 | -1.59532000 | -1.13932100 |
| C | -1.31655300 | 0.19879900  | -2.31173500 |
| H | -0.28961900 | 0.00299700  | -2.64205800 |
| H | -2.00802600 | -0.15708300 | -3.08485900 |
| H | -1.44614500 | 1.28197000  | -2.21202200 |
| C | -3.01507300 | -0.29636000 | -0.50460900 |
| C | -4.00478800 | -1.23994100 | -0.80805400 |
| C | -3.38843900 | 0.85257700  | 0.20691900  |
| C | -5.33294400 | -1.04322200 | -0.42377200 |
| H | -3.72837300 | -2.14394400 | -1.34778000 |
| C | -4.71407100 | 1.05325400  | 0.59340600  |
| H | -2.63329700 | 1.59137900  | 0.45788500  |
| C | -5.69289800 | 0.10704500  | 0.27962100  |
| H | -6.08348500 | -1.79190900 | -0.66689700 |
| H | -4.98477900 | 1.95169400  | 1.14380300  |
| H | -6.72483500 | 0.26329300  | 0.58442900  |
| H | 5.33959800  | -0.73776500 | -2.20379600 |
| H | 1.61354500  | -0.35931000 | 3.13269800  |

SCF: E(RB+HF-LYP) = -1148.86640646  
 Sum of electronic and zero-point  
 Energies= -1148.460844  
 Sum of electronic and thermal  
 Energies= -1148.436290  
 Sum of electronic and thermal  
 Enthalpies= -1148.435346  
 Sum of electronic and thermal  
 Free Energies= -1148.518332

### 9a' (optimized by B3LYP/6-31G(d))

|   |             |             |             |
|---|-------------|-------------|-------------|
| C | 0.06322900  | 2.30530900  | 0.35436400  |
| O | -0.88163000 | 0.53912900  | 0.98906100  |
| C | -0.14277600 | -0.09204300 | 1.98649000  |
| O | 0.81242200  | 2.66282700  | 1.25294900  |
| C | -1.24708500 | 3.00216700  | 0.02781700  |
| O | -3.26028300 | -0.03300800 | 0.70305900  |
| C | -3.53791300 | -0.58400600 | -0.45281100 |
| O | -2.72923300 | -0.77457100 | -1.36623200 |
| C | -5.00343000 | -0.98805200 | -0.58045400 |
| H | -1.91668600 | 2.33503100  | -0.51882600 |
| H | -0.99451700 | 3.83587600  | -0.64767600 |
| H | -5.21587800 | -1.70278000 | 0.22567200  |
| H | -5.61087200 | -0.10369700 | -0.34856700 |
| H | -2.19225300 | 0.19876600  | 0.82264800  |
| N | 0.66566900  | 1.61018800  | -0.79622200 |
| C | 1.94098500  | 1.19490800  | -0.83069100 |
| C | -0.12690000 | 0.97418200  | -1.87096000 |
| C | 3.06124800  | 1.56661000  | -0.04442600 |
| N | 2.12738200  | 0.27636200  | -1.83048900 |
| C | 0.83892800  | -0.06307200 | -2.47613300 |
| H | -1.01258100 | 0.48455200  | -1.46029200 |
| C | 4.27890800  | 0.99017600  | -0.32635400 |
| H | 2.90662700  | 2.27759000  | 0.75271400  |
| C | 3.32584400  | -0.29869000 | -2.10179900 |
| H | 0.93592000  | 0.01534600  | -3.56139600 |
| H | 0.57060200  | -1.08545300 | -2.19872000 |
| C | 4.43129800  | 0.04324400  | -1.36840200 |
| H | 5.14344500  | 1.27046700  | 0.26817300  |
| H | 3.33269600  | -1.02052700 | -2.91008200 |
| C | 0.63758100  | -1.30380600 | 1.45831400  |
| C | 1.87990400  | -1.65093200 | 2.00564500  |

### 10b' (optimized by B3LYP/6-31G(d))

|   |             |             |             |
|---|-------------|-------------|-------------|
| C | -0.12451300 | -1.84034400 | 0.86326200  |
| O | -0.77634900 | -0.20770100 | 0.22150000  |
| C | -1.58323200 | -0.37521300 | -0.91829500 |
| O | -0.36327500 | -2.73109100 | 0.04246200  |
| C | -0.77207500 | -1.83056800 | 2.24977100  |
| O | -0.11690800 | 2.21183400  | 0.54572500  |
| C | 1.09312900  | 2.62559800  | 0.21881400  |
| O | 2.03977600  | 1.88878700  | -0.04671100 |
| C | 1.19980800  | 4.14414100  | 0.20502400  |
| H | -0.71995000 | -0.83170800 | 2.69245700  |
| H | -0.17809300 | -2.50740000 | 2.88469100  |
| H | 0.74203300  | 4.52222700  | 1.12735100  |
| H | 0.55308000  | 4.50367100  | -0.60679900 |
| H | -0.27635800 | 1.17746100  | 0.39970600  |
| N | 1.31847000  | -1.40073800 | 0.95021000  |
| C | 2.16972500  | -1.47328300 | -0.07805200 |
| C | 1.83693700  | -0.48847800 | 1.98445100  |
| C | 2.04780300  | -2.12320100 | -1.33402200 |
| N | 3.33365900  | -0.80614600 | 0.19529900  |
| C | 3.29181600  | -0.21481700 | 1.54620700  |
| H | 1.24590900  | 0.42849800  | 1.99821500  |
| C | 3.09409600  | -2.02732100 | -2.22222200 |
| H | 1.13203300  | -2.66193400 | -1.52875600 |
| C | 4.36098300  | -0.70422100 | -0.68291400 |
| H | 4.02837700  | -0.72065800 | 2.17901900  |
| H | 3.50933900  | 0.85013100  | 1.47654500  |
| C | 4.27483500  | -1.30864400 | -1.90925900 |
| H | 3.00867600  | -2.51335200 | -3.18981000 |
| H | 5.21473800  | -0.12639500 | -0.34906800 |
| H | -1.56055100 | -1.44488200 | -1.17997400 |
| C | -1.01883900 | 0.41050500  | -2.12035500 |
| H | 0.02418700  | 0.12298400  | -2.29635900 |

|   |             |             |             |
|---|-------------|-------------|-------------|
| C | 0.11791500  | -2.10530300 | 0.43057700  |
| C | 2.58638600  | -2.76644200 | 1.54989600  |
| H | 2.29896200  | -1.03658200 | 2.80110500  |
| C | 0.81939000  | -3.22496100 | -0.02518500 |
| H | -0.83644000 | -1.84013100 | -0.01628900 |
| C | 2.05751600  | -3.56028300 | 0.53024800  |
| H | 3.54910900  | -3.01552100 | 1.99109100  |
| H | 0.39184900  | -3.84397300 | -0.81172300 |
| H | 2.60067100  | -4.43344700 | 0.17646200  |
| C | -1.03425600 | -0.50813200 | 3.17574700  |
| H | -1.54065400 | 0.37517000  | 3.58001900  |
| H | -1.79888700 | -1.22327600 | 2.85306500  |
| H | -0.44442900 | -0.97136200 | 3.97603800  |
| H | 0.60146300  | 0.62797800  | 2.37608400  |
| C | -5.36690800 | -1.57116800 | -1.94406500 |
| H | -4.76787100 | -2.46077100 | -2.16151300 |
| H | -6.42617700 | -1.85004700 | -1.97786500 |
| H | -5.17561800 | -0.84877200 | -2.74406700 |
| C | -1.93473000 | 3.53289900  | 1.28423000  |
| H | -1.25933400 | 4.17736400  | 1.85361100  |
| H | -2.82838900 | 4.10671200  | 1.01673500  |
| H | -2.23283600 | 2.69616000  | 1.92032700  |
| H | 5.38934900  | -0.41225000 | -1.58642800 |
| H | -0.41966300 | 1.73107100  | -2.60629900 |

SCF: E(RB+HF-LYP) = -1227.49751796  
Sum of electronic and zero-point  
Energies= -1227.035839  
Sum of electronic and thermal  
Energies= -1227.008440  
Sum of electronic and thermal  
Enthalpies= -1227.007495  
Sum of electronic and thermal  
Free Energies= -1227.096699

|   |             |             |             |
|---|-------------|-------------|-------------|
| H | -1.59681700 | 0.20898500  | -3.03020900 |
| H | -1.05321100 | 1.48934700  | -1.93243500 |
| C | -3.04420000 | 0.00752200  | -0.67297200 |
| C | -4.06490900 | -0.62324400 | -1.39722500 |
| C | -3.39874000 | 1.01011700  | 0.23901200  |
| C | -5.40167700 | -0.26115900 | -1.22556300 |
| H | -3.80751700 | -1.41386400 | -2.09999100 |
| C | -4.73501900 | 1.37468400  | 0.41499600  |
| H | -2.62009200 | 1.50147300  | 0.81338000  |
| C | -5.74225900 | 0.74249700  | -0.31668500 |
| H | -6.17744800 | -0.76852500 | -1.79447300 |
| H | -4.99044200 | 2.15504200  | 1.12846200  |
| H | -6.78271400 | 1.02509800  | -0.17627000 |
| C | 2.62741400  | 4.65769800  | 0.03241400  |
| H | 3.07235500  | 4.27048500  | -0.88891700 |
| H | 2.64326000  | 5.75215000  | -0.00759700 |
| H | 3.26587800  | 4.33904200  | 0.86358700  |
| C | -2.21897800 | -2.31819000 | 2.20220600  |
| H | -2.27358300 | -3.30030400 | 1.72483000  |
| H | -2.62974900 | -2.39470200 | 3.21516700  |
| H | -2.84036100 | -1.62524600 | 1.62951000  |
| H | 5.09318600  | -1.22613000 | -2.61385500 |
| H | 1.79034300  | -0.96243900 | 2.96766100  |

SCF: E(RB+HF-LYP) = -1227.49457587  
Sum of electronic and zero-point  
Energies= -1227.031246  
Sum of electronic and thermal  
Energies= -1227.004133  
Sum of electronic and thermal  
Enthalpies= -1227.003188  
Sum of electronic and thermal  
Free Energies= -1227.091600



## Optimized geometries at M05-2X/6-31G(d) level

### 7a' (optimized by M05-2X/6-31G(d))

|   |             |             |             |
|---|-------------|-------------|-------------|
| C | 0.30653400  | -1.93343900 | 1.46495500  |
| O | 1.26502600  | -0.13599800 | 1.03067700  |
| C | 0.66703800  | 0.92115200  | 1.71379000  |
| O | -0.39564600 | -1.75168300 | 2.45083200  |
| C | 1.60128200  | -2.71467400 | 1.50985400  |
| O | 3.55790900  | 0.16183400  | 0.18309500  |
| C | 3.65959600  | 0.13255900  | -1.12205700 |
| O | 2.73888600  | -0.11185300 | -1.90797600 |
| C | 5.06473700  | 0.43558900  | -1.61529400 |
| H | 2.09652700  | -2.46794000 | 2.44939800  |
| H | 1.37157600  | -3.78919200 | 1.50583400  |
| H | 2.27863600  | -2.48689000 | 0.68688500  |
| H | 5.78245100  | -0.24302300 | -1.14236700 |
| H | 5.11580000  | 0.33687100  | -2.70100500 |
| H | 5.34616800  | 1.45354800  | -1.32373700 |
| H | 2.52370200  | 0.03703900  | 0.54748100  |
| N | -0.35494800 | -1.94670600 | 0.14824100  |
| C | -1.61153300 | -1.51893000 | -0.05281600 |
| C | 0.38710700  | -2.01569300 | -1.12814800 |
| C | -2.68401200 | -1.33233800 | 0.85518900  |
| N | -1.83097500 | -1.25518800 | -1.37915900 |
| C | -0.57731400 | -1.39214400 | -2.15403900 |
| H | 1.30122400  | -1.42256400 | -1.07785900 |
| C | -3.89423700 | -0.90352800 | 0.35893800  |
| H | -2.49796700 | -1.51985100 | 1.90164500  |
| C | -3.02230500 | -0.82737600 | -1.86736800 |
| H | -0.74884500 | -2.02070300 | -3.03080000 |
| H | -0.24505400 | -0.39919900 | -2.46749600 |
| C | -4.08440300 | -0.64789300 | -1.02083100 |

|   |             |             |             |
|---|-------------|-------------|-------------|
| H | -4.72253600 | -0.75778800 | 1.04592700  |
| H | -3.05882900 | -0.64463200 | -2.93494900 |
| C | -0.21573900 | 1.78350500  | 0.80230700  |
| C | -1.33001200 | 2.46044900  | 1.31602500  |
| C | 0.07949200  | 1.92841000  | -0.56094300 |
| C | -2.12696200 | 3.26544000  | 0.49949000  |
| H | -1.57657800 | 2.35273000  | 2.37123100  |
| C | -0.71366700 | 2.73588000  | -1.38065700 |
| H | 0.93501700  | 1.40082200  | -0.97397700 |
| C | -1.82125400 | 3.40678500  | -0.85583300 |
| H | -2.98711600 | 3.78127500  | 0.92094100  |
| H | -0.45907600 | 2.84943100  | -2.43282500 |
| H | -2.43670000 | 4.03632100  | -1.49424100 |
| C | 1.71764400  | 1.79487800  | 2.43132100  |
| H | 2.30682800  | 1.17077500  | 3.11207600  |
| H | 2.40151000  | 2.25019600  | 1.70668600  |
| H | 1.24457800  | 2.59711500  | 3.01046500  |
| H | 0.00807000  | 0.49759500  | 2.49460000  |
| H | -5.03669700 | -0.30891400 | -1.40957100 |
| H | 0.61742200  | -3.05994100 | -1.36424200 |

SCF: E(RB+HF-LYP) = -1148.86772607  
Sum of electronic and zero-point  
Energies= -1148.463748  
Sum of electronic and thermal  
Energies= -1148.438916  
Sum of electronic and thermal  
Enthalpies= -1148.437972  
Sum of electronic and thermal  
Free Energies= -1148.522547

### 8b' (optimized by M05-2X/6-31G(d))

|   |             |             |             |
|---|-------------|-------------|-------------|
| C | 0.00228300  | -1.61860700 | 0.96735600  |
| O | -0.61865500 | -0.12234500 | -0.01435100 |
| C | -1.57323500 | -0.51455100 | -0.97007300 |
| O | -0.09174500 | -2.62712000 | 0.26441300  |
| C | -0.84989100 | -1.44177500 | 2.21416600  |
| O | -0.26515400 | 2.37005100  | -0.02912100 |
| C | 0.94807200  | 2.86717700  | -0.16047800 |
| O | 1.98780600  | 2.21615300  | -0.09332800 |
| C | 0.93692300  | 4.36395900  | -0.40726300 |
| H | -1.87369700 | -1.70563000 | 1.94575600  |
| H | -0.50531500 | -2.13718500 | 2.99167700  |
| H | -0.84841800 | -0.42328500 | 2.60605100  |
| H | 0.31985900  | 4.86741900  | 0.34375700  |
| H | 1.95420400  | 4.75829600  | -0.38569200 |
| H | 0.48583600  | 4.57006500  | -1.38436100 |
| H | -0.30790900 | 1.30848300  | -0.00584700 |
| N | 1.38570100  | -1.06568000 | 1.14750100  |
| C | 2.30582400  | -1.11913200 | 0.17468400  |
| C | 1.72483500  | -0.00041600 | 2.10705000  |
| C | 2.31994400  | -1.85081900 | -1.03890100 |
| N | 3.37890600  | -0.32488500 | 0.46852000  |
| C | 3.19063900  | 0.34217600  | 1.77127700  |
| H | 1.07235800  | 0.86029600  | 1.94837300  |
| C | 3.40521200  | -1.70594800 | -1.87292800 |
| H | 1.46971500  | -2.48355500 | -1.24830400 |
| C | 4.44375400  | -0.17393100 | -0.35546500 |
| H | 3.90034600  | -0.07966800 | 2.49085200  |
| H | 3.34912300  | 1.41303100  | 1.65231300  |
| C | 4.49105600  | -0.85854400 | -1.54164800 |

|   |             |             |             |
|---|-------------|-------------|-------------|
| H | 3.42450800  | -2.25202500 | -2.81161800 |
| H | 5.21452800  | 0.50734100  | -0.01541100 |
| H | -1.44386100 | -1.59532000 | -1.13932100 |
| C | -1.31655300 | 0.19879900  | -2.31173500 |
| H | -0.28961900 | 0.00299700  | -2.64205800 |
| H | -2.00802600 | -0.15708300 | -3.08485900 |
| H | -1.44614500 | 1.28197000  | -2.21202200 |
| C | -3.01507300 | -0.29636000 | -0.50460900 |
| C | -4.00478800 | -1.23994100 | -0.80805400 |
| C | -3.38843900 | 0.85257700  | 0.20691900  |
| C | -5.33294400 | -1.04322200 | -0.42377200 |
| H | -3.72837300 | -2.14394400 | -1.34778000 |
| C | -4.71407100 | 1.05325400  | 0.59340600  |
| H | -2.63329700 | 1.59137900  | 0.45788500  |
| C | -5.69289800 | 0.10704500  | 0.27962100  |
| H | -6.08348500 | -1.79190900 | -0.66689700 |
| H | -4.98477900 | 1.95169400  | 1.14380300  |
| H | -6.72483500 | 0.26329300  | 0.58442900  |
| H | 5.33959800  | -0.73776500 | -2.20379600 |
| H | 1.61354500  | -0.35931000 | 3.13269800  |

SCF: E(RB+HF-LYP) = -1148.86640646  
Sum of electronic and zero-point  
Energies= -1148.460844  
Sum of electronic and thermal  
Energies= -1148.436290  
Sum of electronic and thermal  
Enthalpies= -1148.435346  
Sum of electronic and thermal  
Free Energies= -1148.518332

**9a' (optimized by M05-2X/6-31G(d))**

|   |             |             |             |
|---|-------------|-------------|-------------|
| C | 0.06322900  | 2.30530900  | 0.35436200  |
| O | -0.88163000 | 0.53913000  | 0.98906100  |
| C | -0.14277600 | -0.09204100 | 1.98649000  |
| O | 0.81242200  | 2.66282800  | 1.25294700  |
| C | -1.24708500 | 3.00216700  | 0.02781500  |
| O | -3.26028300 | -0.03300800 | 0.70305900  |
| C | -3.53791300 | -0.58400700 | -0.45281000 |
| O | -2.72923300 | -0.77457200 | -1.36623100 |
| C | -5.00343000 | -0.98805300 | -0.58045300 |
| H | -1.91668600 | 2.33503000  | -0.51882800 |
| H | -0.99451700 | 3.83587500  | -0.64767900 |
| H | -5.21587800 | -1.70278000 | 0.22567400  |
| H | -5.61087200 | -0.10369800 | -0.34856700 |
| H | -2.19225300 | 0.19876600  | 0.82264800  |
| N | 0.66566900  | 1.61018700  | -0.79622300 |
| C | 1.94098500  | 1.19490700  | -0.83069200 |
| C | -0.12690000 | 0.97418000  | -1.87096100 |
| C | 3.06124800  | 1.56661000  | -0.04442700 |
| N | 2.12738200  | 0.27636000  | -1.83048900 |
| C | 0.83892800  | -0.06307400 | -2.47613300 |
| H | -1.01258100 | 0.48455100  | -1.46029200 |
| C | 4.27890800  | 0.99017600  | -0.32635400 |
| H | 2.90662700  | 2.27759100  | 0.75271200  |
| C | 3.32584400  | -0.29869200 | -2.10179800 |
| H | 0.93592000  | 0.01534300  | -3.56139600 |
| H | 0.57060200  | -1.08545500 | -2.19871900 |
| C | 4.43129800  | 0.04324300  | -1.36840200 |
| H | 5.14344500  | 1.27046700  | 0.26817200  |
| H | 3.33269600  | -1.02053000 | -2.91008100 |
| C | 0.63758100  | -1.30380500 | 1.45831500  |
| C | 1.87990400  | -1.65093000 | 2.00564700  |
| C | 0.11791500  | -2.10530300 | 0.43057900  |

|   |             |             |             |
|---|-------------|-------------|-------------|
| C | 2.58638600  | -2.76644100 | 1.54989900  |
| H | 2.29896200  | -1.03658000 | 2.80110600  |
| C | 0.81939000  | -3.22496100 | -0.02518200 |
| H | -0.83644000 | -1.84013100 | -0.01628700 |
| C | 2.05752000  | -3.56027700 | 0.53024500  |
| H | 3.54910900  | -3.01551900 | 1.99109400  |
| H | 0.39184900  | -3.84397400 | -0.81171900 |
| H | 2.60067500  | -4.43344200 | 0.17646000  |
| C | -1.03425600 | -0.50812900 | 3.17574800  |
| H | -1.54065400 | 0.37517300  | 3.58001900  |
| H | -1.79888700 | -1.22327400 | 2.85306600  |
| H | -0.44442900 | -0.97135900 | 3.97603900  |
| H | 0.60146300  | 0.62798000  | 2.37608400  |
| C | -5.36690800 | -1.57117000 | -1.94406400 |
| H | -4.76787100 | -2.46077300 | -2.16151100 |
| H | -6.42617700 | -1.85004900 | -1.97786300 |
| H | -5.17561800 | -0.84877500 | -2.74406600 |
| C | -1.93473000 | 3.53290000  | 1.28422700  |
| H | -1.25933400 | 4.17736500  | 1.85360800  |
| H | -2.82838900 | 4.10671300  | 1.01673200  |
| H | -2.23283600 | 2.69616100  | 1.92032500  |
| H | 5.38934900  | -0.41225100 | -1.58642700 |
| H | -0.41966300 | 1.73106900  | -2.60630000 |

SCF: E(RB+HF-LYP) = -1227.49751796  
Sum of electronic and zero-point  
Energies= -1227.035839  
Sum of electronic and thermal  
Energies= -1227.008440  
Sum of electronic and thermal  
Enthalpies= -1227.007495  
Sum of electronic and thermal  
Free Energies= -1227.096699

**10b' (optimized by M05-2X/6-31G(d))**

|   |             |             |             |
|---|-------------|-------------|-------------|
| C | -0.12508200 | -1.83982500 | 0.86334800  |
| O | -0.77661500 | -0.20734200 | 0.22132900  |
| C | -1.58354400 | -0.37485900 | -0.91846100 |
| O | -0.36396100 | -2.73071700 | 0.04272600  |
| C | -0.77262500 | -1.82972500 | 2.24987300  |
| O | -0.11592800 | 2.21175100  | 0.54567600  |
| C | 1.09417100  | 2.62496600  | 0.21829800  |
| O | 2.04026300  | 1.88771400  | -0.04799700 |
| C | 1.20171800  | 4.14345500  | 0.20501300  |
| H | -0.72031400 | -0.83080900 | 2.69241400  |
| H | -0.17876800 | -2.50657800 | 2.88488600  |
| H | 0.74411900  | 4.52152700  | 1.12743000  |
| H | 0.55523600  | 4.50359600  | -0.60673900 |
| H | -0.27605200 | 1.17748900  | 0.39915700  |
| N | 1.31800800  | -1.40043700 | 0.95024400  |
| C | 2.16932300  | -1.47336300 | -0.07793800 |
| C | 1.83671600  | -0.48831300 | 1.98448100  |
| C | 2.04728000  | -2.12334500 | -1.33386000 |
| N | 3.33345600  | -0.80659100 | 0.19544900  |
| C | 3.29173700  | -0.21523100 | 1.54634300  |
| H | 1.24601700  | 0.42887700  | 1.99814700  |
| C | 3.09366700  | -2.02788100 | -2.22199100 |
| H | 1.13135100  | -2.66180700 | -1.52860000 |
| C | 4.36086800  | -0.70505500 | -0.68270400 |
| H | 4.02804800  | -0.72135900 | 2.17922000  |
| H | 3.50972100  | 0.84962800  | 1.47672400  |
| C | 4.27460900  | -1.30954800 | -1.90900700 |
| H | 3.00816300  | -2.51397000 | -3.18954200 |
| H | 5.21478200  | -0.12747000 | -0.34885100 |
| H | -1.56086000 | -1.44452000 | -1.18014900 |
| C | -1.01919400 | 0.41091000  | -2.12049600 |
| H | 0.02384100  | 0.12344600  | -2.29652500 |

|   |             |             |             |
|---|-------------|-------------|-------------|
| H | -1.59719100 | 0.20939100  | -3.03033700 |
| H | -1.05360500 | 1.48975000  | -1.93255700 |
| C | -3.04446900 | 0.00791800  | -0.67302700 |
| C | -4.06536600 | -0.62356000 | -1.39638300 |
| C | -3.39876900 | 1.01133600  | 0.23815800  |
| C | -5.40210300 | -0.26138300 | -1.22462400 |
| H | -3.80815200 | -1.41480000 | -2.09851500 |
| C | -4.73500600 | 1.37598700  | 0.41423700  |
| H | -2.61996100 | 1.50326100  | 0.81183300  |
| C | -5.74244600 | 0.74307600  | -0.31655200 |
| H | -6.17802900 | -0.76930600 | -1.79282700 |
| H | -4.99024800 | 2.15698000  | 1.12707300  |
| H | -6.78287000 | 1.02575000  | -0.17606200 |
| C | 2.62962000  | 4.65625100  | 0.03258200  |
| H | 3.07437600  | 4.26900400  | -0.88882300 |
| H | 2.64609200  | 5.75070300  | -0.00716300 |
| H | 3.26787500  | 4.33704200  | 0.86370500  |
| C | -2.21962000 | -2.31708100 | 2.20239100  |
| H | -2.27440400 | -3.29930500 | 1.72526100  |
| H | -2.63043600 | -2.39325800 | 3.21536000  |
| H | -2.84085600 | -1.62416200 | 1.62950300  |
| H | 5.09303200  | -1.22734400 | -2.61355600 |
| H | 1.78986300  | -0.96219300 | 2.96771700  |

SCF: E(RB+HF-LYP) = -1227.49457571  
Sum of electronic and zero-point  
Energies= -1227.031250  
Sum of electronic and thermal  
Energies= -1227.004135  
Sum of electronic and thermal  
Enthalpies= -1227.003191  
Sum of electronic and thermal  
Free Energies= -1227.091611

## Optimized geometries at MP2/6-31G(d) level

### 7a' (optimized by MP2/6-31G(d))

|   |             |             |             |
|---|-------------|-------------|-------------|
| C | -0.68093600 | 2.25656100  | 0.88192200  |
| O | -0.96158500 | 0.32079100  | 0.78427500  |
| C | -0.17892900 | -0.32638300 | 1.76110400  |
| O | 0.17481700  | 2.48920100  | 1.74127600  |
| C | -2.11654900 | 2.68408300  | 1.07586100  |
| O | -3.32462800 | -0.42982400 | 0.38650200  |
| C | -3.46403600 | -1.21912000 | -0.66798700 |
| O | -2.54794600 | -1.58166000 | -1.41458400 |
| C | -4.89676200 | -1.65126800 | -0.87225900 |
| H | -2.35024500 | 2.51356400  | 2.12766400  |
| H | -2.19088900 | 3.75741800  | 0.86737800  |
| H | -2.83918300 | 2.14198400  | 0.46925600  |
| H | -5.54714500 | -0.77432200 | -0.91251700 |
| H | -4.98217200 | -2.23026800 | -1.79127300 |
| H | -5.21648600 | -2.25631300 | -0.01980100 |
| H | -2.29847900 | -0.17640400 | 0.56019000  |
| N | -0.22143900 | 2.30044500  | -0.54726300 |
| C | 1.03456500  | 1.77575900  | -0.69693200 |
| C | -1.06843500 | 1.69986900  | -1.60255900 |
| C | 2.22398700  | 2.13299400  | -0.04353100 |
| N | 1.06614100  | 0.77149300  | -1.61022700 |
| C | -0.29111400 | 0.48573300  | -2.11688900 |
| H | -2.02844800 | 1.38960400  | -1.19908900 |
| C | 3.37647300  | 1.42025200  | -0.33713800 |
| H | 2.20162900  | 2.94589900  | 0.66808300  |
| C | 2.17592500  | 0.05949300  | -1.90785000 |

|   |             |             |             |
|---|-------------|-------------|-------------|
| H | -0.26544600 | 0.41733900  | -3.20706100 |
| H | -0.64561000 | -0.44464300 | -1.67408700 |
| C | 3.35885900  | 0.36968900  | -1.26789000 |
| H | 4.30601000  | 1.68214700  | 0.16156900  |
| H | 2.06250800  | -0.73424700 | -2.63720600 |
| C | 0.87436900  | -1.20304100 | 1.10942600  |
| C | 2.20247700  | -1.18866800 | 1.55293900  |
| C | 0.51949700  | -2.08713500 | 0.07772000  |
| C | 3.15968400  | -2.03834500 | 0.98869600  |
| H | 2.48512500  | -0.50833200 | 2.35603000  |
| C | 1.47512700  | -2.93137300 | -0.49386500 |
| H | -0.51227200 | -2.11581800 | -0.26856900 |
| C | 2.79799500  | -2.91290600 | -0.03840900 |
| H | 4.18404300  | -2.02401500 | 1.35760600  |
| H | 1.18064800  | -3.62392200 | -1.28099100 |
| H | 3.53664900  | -3.58439400 | -0.47193600 |
| C | -1.04916000 | -1.14615100 | 2.71547600  |
| H | -1.78505200 | -0.49228800 | 3.19331200  |
| H | -1.58377200 | -1.92732700 | 2.16632800  |
| H | -0.43977300 | -1.62261300 | 3.49130500  |
| H | 0.34617600  | 0.45032200  | 2.34619400  |
| H | 4.25240800  | -0.19948600 | -1.49657000 |
| H | -1.22661600 | 2.44421200  | -2.39015600 |

E(RHF) = -1141.77441741  
E2 = -0.3521166017D+01  
EUMP2 = -0.11452955834244D+04

### 8b' (optimized by MP2/6-31G(d))

|   |             |             |             |
|---|-------------|-------------|-------------|
| C | -0.17213300 | -1.64658400 | 1.01990000  |
| O | -0.42573300 | -0.08620500 | -0.09584400 |
| C | -1.36349100 | -0.38107100 | -1.11360300 |
| O | -0.37608600 | -2.64845000 | 0.32537300  |
| C | -1.09151200 | -1.27110000 | 2.15862400  |
| O | -0.11334900 | 2.35544600  | 0.17513700  |
| C | 1.12009200  | 2.79043100  | 0.00041800  |
| O | 2.12685200  | 2.07199600  | -0.05239300 |
| C | 1.18993500  | 4.29504400  | -0.12756600 |
| H | -2.11037700 | -1.43550800 | 1.80660800  |
| H | -0.89781400 | -1.93593100 | 3.00936100  |
| H | -0.99267100 | -0.23104000 | 2.46828500  |
| H | 0.66599000  | 4.76374000  | 0.70873200  |
| H | 2.22966900  | 4.62096100  | -0.15531100 |
| H | 0.68145200  | 4.60291700  | -1.04519300 |
| H | -0.20082900 | 1.25993300  | 0.07311400  |
| N | 1.24543900  | -1.28367100 | 1.27320000  |
| C | 2.08505200  | -1.26144700 | 0.20672300  |
| C | 1.59035900  | -0.13979600 | 2.13792800  |
| C | 2.00692300  | -1.91867500 | -1.03690900 |
| N | 3.15279200  | -0.45943100 | 0.45161600  |
| C | 3.06474100  | 0.09552600  | 1.81286000  |
| H | 0.98888800  | 0.72984100  | 1.86397100  |
| C | 3.00980300  | -1.68653800 | -1.96018800 |
| H | 1.15903100  | -2.56548700 | -1.21775700 |
| C | 4.14101800  | -0.21846000 | -0.43961400 |

|   |             |             |             |
|---|-------------|-------------|-------------|
| H | 3.73415000  | -0.47832000 | 2.46237700  |
| H | 3.33876800  | 1.14897200  | 1.79218400  |
| C | 4.09008200  | -0.83038100 | -1.67120100 |
| H | 2.95390200  | -2.17063500 | -2.93169000 |
| H | 4.91380700  | 0.47425200  | -0.12620200 |
| H | -1.25512000 | -1.44909400 | -1.36372000 |
| C | -1.04915100 | 0.44289500  | -2.36143500 |
| H | -0.01635600 | 0.25213300  | -2.67138700 |
| H | -1.72515000 | 0.17942500  | -3.18218500 |
| H | -1.15616800 | 1.51075200  | -2.15229000 |
| C | -2.78744500 | -0.17413600 | -0.63795400 |
| C | -3.71585200 | -1.22003500 | -0.69715200 |
| C | -3.19405500 | 1.06120800  | -0.11170400 |
| C | -5.02962000 | -1.03875000 | -0.25558600 |
| H | -3.39795600 | -2.18913700 | -1.07920100 |
| C | -4.50483900 | 1.24476200  | 0.32926800  |
| H | -2.47732100 | 1.87613400  | -0.03759300 |
| C | -5.42788300 | 0.19664700  | 0.25762600  |
| H | -5.73808900 | -1.86317600 | -0.30543800 |
| H | -4.80878600 | 2.20793600  | 0.73467400  |
| H | -6.44869000 | 0.34198300  | 0.60430500  |
| H | 4.86969200  | -0.63645800 | -2.39913400 |
| H | 1.43675800  | -0.39201700 | 3.18898500  |

E(RHF) = -1141.78143441  
E2 = -0.3507901417D+01  
EUMP2 = -0.11452893358233D+04

### 9a' (optimized by MP2/6-31G(d))

|   |             |            |             |
|---|-------------|------------|-------------|
| C | -0.13120000 | 2.44800400 | -0.06733400 |
| O | -0.80452500 | 0.69298000 | 0.83786800  |
| C | 0.10874100  | 0.25181800 | 1.79884600  |
| O | 0.58918700  | 3.02439700 | 0.74463300  |
| C | -1.53220900 | 2.89968600 | -0.40461600 |

|   |             |             |             |
|---|-------------|-------------|-------------|
| O | -3.12728100 | -0.11746100 | 0.92951500  |
| C | -3.43779000 | -0.84260200 | -0.12153800 |
| O | -2.67113800 | -1.11894700 | -1.05975200 |
| C | -4.87192100 | -1.33831900 | -0.09270600 |
| H | -2.11608200 | 2.07113800  | -0.80888400 |
| H | -1.43573500 | 3.65764800  | -1.19665000 |
| H | -4.99833000 | -1.91594300 | 0.83016100  |
| H | -5.51983100 | -0.46153900 | 0.01901500  |

|   |             |             |             |          |                       |             |             |
|---|-------------|-------------|-------------|----------|-----------------------|-------------|-------------|
| H | -2.06823400 | 0.21471700  | 0.90059200  | C        | 2.26377800            | -3.29343900 | 0.52112600  |
| N | 0.51923000  | 1.68224200  | -1.14029500 | H        | 3.84286100            | -2.60988900 | 1.82594700  |
| C | 1.75954300  | 1.17735200  | -0.94017700 | H        | 0.50896200            | -3.72164600 | -0.66206600 |
| C | -0.27146700 | 0.75709700  | -1.98052000 | H        | 2.78863300            | -4.19929800 | 0.22368300  |
| C | 2.84054700  | 1.66771600  | -0.17625100 | C        | -0.59183900           | -0.06305700 | 3.12519600  |
| N | 1.94483700  | 0.03845200  | -1.66256700 | H        | -1.11131900           | 0.83180800  | 3.48037800  |
| C | 0.75312800  | -0.27414700 | -2.47418000 | H        | -1.32970900           | -0.85589400 | 2.97111300  |
| H | -1.04010800 | 0.27532900  | -1.37577400 | H        | 0.12202800            | -0.38990200 | 3.88948300  |
| C | 4.01718300  | 0.94191000  | -0.16291600 | H        | 0.83845100            | 1.06447600  | 1.98852100  |
| H | 2.70372500  | 2.58165600  | 0.38366700  | C        | -5.24956200           | -2.15847000 | -1.31737800 |
| C | 3.08887600  | -0.68604600 | -1.65527000 | H        | -4.60395300           | -3.03428200 | -1.40906400 |
| H | 1.01443700  | -0.15580700 | -3.52963600 | H        | -6.28815600           | -2.49576100 | -1.25159600 |
| H | 0.44414200  | -1.30153800 | -2.27337800 | H        | -5.13288300           | -1.56836600 | -2.22886300 |
| C | 4.15037800  | -0.25284100 | -0.89399000 | C        | -2.22345500           | 3.48452400  | 0.81888300  |
| H | 4.85361100  | 1.30639100  | 0.42793300  | H        | -1.63465100           | 4.30174200  | 1.23944200  |
| H | 3.08938900  | -1.58960200 | -2.25472900 | H        | -3.21483700           | 3.86086500  | 0.55170500  |
| C | 0.88621700  | -0.96687600 | 1.31934600  | H        | -2.33200400           | 2.70410300  | 1.57274800  |
| C | 2.16749200  | -1.24917300 | 1.81373400  | H        | 5.06554100            | -0.83354200 | -0.87166300 |
| C | 0.30072600  | -1.86723700 | 0.41743400  | H        | -0.72252400           | 1.30315600  | -2.81283000 |
| C | 2.85291000  | -2.40258800 | 1.42255600  |          |                       |             |             |
| H | 2.62932100  | -0.55916200 | 2.52066400  |          |                       |             |             |
| C | 0.98714100  | -3.01937900 | 0.01994800  | E(RHF) = | -1219.85043945        |             |             |
| H | -0.69445200 | -1.65705400 | 0.03084100  | E2 =     | -0.3779047882D+01     |             |             |
|   |             |             |             | EUMP2 =  | -0.12236294873333D+04 |             |             |

### 10b' (optimized by MP2/6-31G(d))

|   |             |             |             |          |                       |             |             |
|---|-------------|-------------|-------------|----------|-----------------------|-------------|-------------|
| C | 0.28200600  | -1.91132000 | -0.94415700 | H        | 1.45191600            | -1.30921300 | 1.24862800  |
| O | 0.65961200  | -0.16957200 | -0.23976600 | C        | 0.78737900            | 0.57613400  | 2.05967700  |
| C | 1.43003100  | -0.24972300 | 0.94144900  | H        | -0.25283500           | 0.26640700  | 2.20057300  |
| O | 0.64835500  | -2.75903900 | -0.12028700 | H        | 1.33414100            | 0.44892200  | 3.00063000  |
| C | 0.96734300  | -1.74514800 | -2.28740200 | H        | 0.80235300            | 1.63774500  | 1.79590200  |
| O | -0.11194900 | 2.14125900  | -0.71604400 | C        | 2.86414700            | 0.18854100  | 0.71680500  |
| C | -1.33459900 | 2.44309200  | -0.31942800 | C        | 3.92043300            | -0.49278800 | 1.33315100  |
| O | -2.17565900 | 1.62208900  | 0.07139900  | C        | 3.15436400            | 1.30816000  | -0.07542700 |
| C | -1.62112300 | 3.92959400  | -0.38951700 | C        | 5.24141300            | -0.07057700 | 1.16609800  |
| H | 0.76321600  | -0.75407300 | -2.69943300 | H        | 3.70496200            | -1.37442700 | 1.93618200  |
| H | 0.52624800  | -2.49151700 | -2.96544800 | C        | 4.47338100            | 1.73184900  | -0.24502800 |
| H | -1.27704800 | 4.29155100  | -1.36427200 | H        | 2.34257400            | 1.84048800  | -0.56472400 |
| H | -0.97421700 | 4.41601300  | 0.35042400  | C        | 5.52117000            | 1.04609800  | 0.37604200  |
| H | 0.15541000  | 1.10489100  | -0.48956600 | H        | 6.05136200            | -0.61705600 | 1.64508700  |
| N | -1.18528500 | -1.67191200 | -1.04116000 | H        | 4.68611100            | 2.60035300  | -0.86541700 |
| C | -1.92215400 | -1.62168200 | 0.09177800  | H        | 6.54867000            | 1.37582800  | 0.23890400  |
| C | -1.74136400 | -0.70268800 | -2.00216000 | C        | -3.08420600           | 4.26882100  | -0.14496200 |
| C | -1.67377200 | -2.14513300 | 1.37804600  | H        | -3.40684800           | 3.89640900  | 0.82909000  |
| N | -3.09054500 | -0.95907900 | -0.12123500 | H        | -3.24079500           | 5.35062800  | -0.17616200 |
| C | -3.18835500 | -0.54335300 | -1.53017200 | H        | -3.72256300           | 3.80881200  | -0.90380600 |
| H | -1.19641400 | 0.24099900  | -1.93631700 | C        | 2.46734100            | -1.97043300 | -2.16408000 |
| C | -2.61434600 | -1.92140200 | 2.36667500  | H        | 2.66781800            | -2.95264000 | -1.73217800 |
| H | -0.75201400 | -2.68816100 | 1.53726100  | H        | 2.94357900            | -1.91056200 | -3.14731800 |
| C | -4.01902200 | -0.73008500 | 0.83425200  | H        | 2.90452600            | -1.21084300 | -1.51475900 |
| H | -3.87428700 | -1.22541100 | -2.04336700 | H        | -4.53137000           | -1.01938200 | 2.88402700  |
| H | -3.54714600 | 0.48368100  | -1.57878800 | H        | -1.68656200           | -1.09710600 | -3.01866800 |
| C | -3.79972200 | -1.20691800 | 2.10639900  |          |                       |             |             |
| H | -2.42666500 | -2.30339500 | 3.36680800  | E(RHF) = | -1219.84980859        |             |             |
| H | -4.88824100 | -0.15614300 | 0.53282600  | E2 =     | -0.3773952085D+01     |             |             |
|   |             |             |             | EUMP2 =  | -0.12236237606706D+04 |             |             |

### (e) Single-point calculations on TS structures 7a, 8b, 9a, and 10b using additional computational methods and solvation correction

TS structures **7a**, **8b**, **9a**, and **10b** optimized at B3LYP/6-31G\* level of theory as described above were subjected to single-point energy calculations using several computational methods in gas phase (Table S-4). Subsequently, these results were subjected to solvent correction using the CPCM<sup>3</sup> polarizable conductor calculation model

as implemented in Gaussian 03 (Table S-5). Chloroform was specified as the solvent. The UFF atomic radii were used. Hydrogens have individual spheres.

**Table S-4.** Free energies of **7a**, **8b**, **9a**, and **10b** in gas phase

| Method                                        | G <sub>298</sub> of <b>7a</b><br>(a.u.) | G <sub>298</sub> of <b>8b</b><br>(a.u.) | ΔG <sub>rel</sub> ( <b>8b</b> - <b>7a</b> )<br>(kcal/mol) | G <sub>298</sub> of <b>9a</b><br>(a.u.) | G <sub>298</sub> of <b>10b</b><br>(a.u.) | ΔG <sub>rel</sub> ( <b>10b</b> - <b>9a</b> )<br>(kcal/mol) |
|-----------------------------------------------|-----------------------------------------|-----------------------------------------|-----------------------------------------------------------|-----------------------------------------|------------------------------------------|------------------------------------------------------------|
| B3LYP/6-31G*                                  | -1716.533805                            | -1716.530767                            | 1.9                                                       | -1795.109207                            | -1795.103606                             | 3.5                                                        |
| MP2/6-31G*//<br>B3LYP/6-31G* <sup>a</sup>     | -1711.434669                            | -1711.427432                            | 4.5                                                       | -1789.716955                            | -1789.707359                             | 6.0                                                        |
| SCS-MP2/6-31G*//<br>B3LYP/6-31G* <sup>a</sup> | -1711.254999                            | -1711.249121                            | 3.7                                                       | -1789.534322                            | -1789.525727                             | 5.4                                                        |
| M05-2X/6-31G*//<br>B3LYP/6-31G* <sup>a</sup>  | -1716.368694                            | -1716.364145                            | 2.9                                                       | -1794.932492                            | -1794.924754                             | 4.9                                                        |

<sup>a</sup> Thermal correction is calculated at B3LYP/6-31G\* level.

**Table S-5.** Free energies of **7a**, **8b**, **9a**, and **10b** in chloroform

| Method                                        | G <sub>298</sub> of <b>7a</b><br>(a.u.) | G <sub>298</sub> of <b>8b</b><br>(a.u.) | ΔG <sub>rel</sub> ( <b>8b</b> - <b>7a</b> )<br>(kcal/mol) | G <sub>298</sub> of <b>9a</b><br>(a.u.) | G <sub>298</sub> of <b>10b</b><br>(a.u.) | ΔG <sub>rel</sub> ( <b>10b</b> - <b>9a</b> )<br>(kcal/mol) |
|-----------------------------------------------|-----------------------------------------|-----------------------------------------|-----------------------------------------------------------|-----------------------------------------|------------------------------------------|------------------------------------------------------------|
| B3LYP/6-31G*                                  | -1716.511641                            | -1716.509035                            | 1.6                                                       | -1795.081571                            | -1795.077051                             | 2.8                                                        |
| MP2/6-31G*//<br>B3LYP/6-31G* <sup>a</sup>     | -1711.451895                            | -1711.443409                            | 5.3                                                       | -1789.732726                            | -1789.722749                             | 6.3                                                        |
| SCS-MP2/6-31G*//<br>B3LYP/6-31G* <sup>a</sup> | -1711.272472                            | -1711.265275                            | 4.5                                                       | -1789.550318                            | -1789.541284                             | 5.7                                                        |
| M05-2X/6-31G*//<br>B3LYP/6-31G* <sup>a</sup>  | -1716.348901                            | -1716.344598                            | 2.7                                                       | -1794.907011                            | -1794.900313                             | 4.2                                                        |

<sup>a</sup> Thermal correction is calculated at B3LYP/6-31G\* level.

### (e) Interaction energies of benzene and N-acetyl-6-CF<sub>3</sub>-DHIP<sup>+</sup>

N-acetyl-6-trifluoromethyl-DHIP cation lacking the phenyl group at C2 was used instead of the analogous CF<sub>3</sub>-PIP derivative to simplify the calculation. Geometries of the complexes of benzene and this cation are shown in Figure S-9. Intermolecular distances are the distance between the centers of benzene and pyridinium ring (center-center), between the pyridinium nitrogen and the center of benzene (N-center), and between the midpoint of the N-C bond and the center of benzene (edge-center).

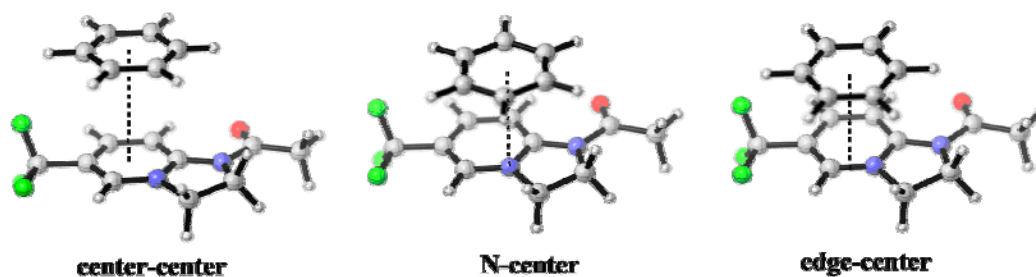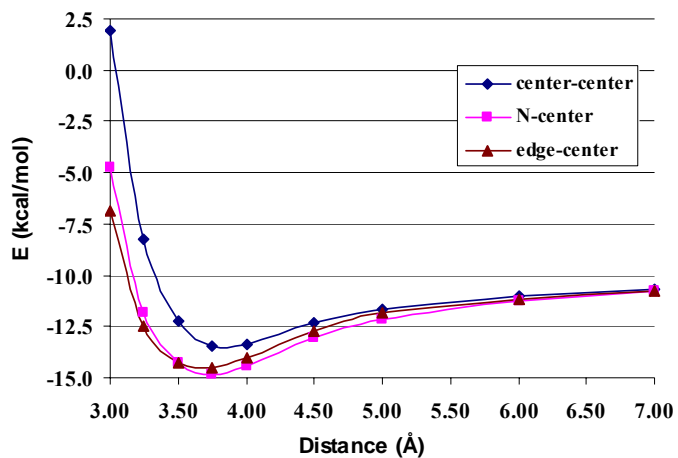

Figure S-10. Interaction energies of benzene and N-acetyl-6-CF<sub>3</sub>-DHIP<sup>+</sup>

**(f) Electrostatic potential of 7a**

The electrostatic potential of 7a was calculated in Gaussian 03.

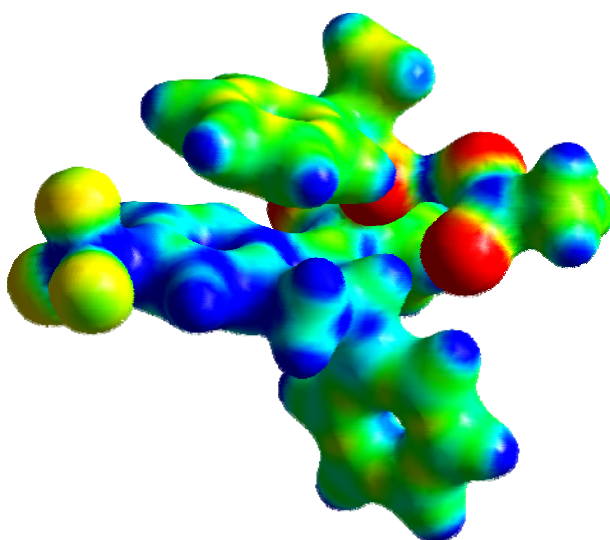

Figure S-11. Electrostatic potential of 7a

## REFERENCES

---

- <sup>1</sup> Gaussian 03, Revision D.01: Frisch, M. J.; Trucks, G. W.; Schlegel, H. B.; Scuseria, G. E.; Robb, M. A.; Cheeseman, J. R.; Montgomery Jr., J. A.; Vreven, T.; Kudin, K. N.; Burant, J. C.; Millam, J. M.; Iyengar, S. S.; Tomasi, J.; Barone, V.; Mennucci, B.; Cossi, M.; Scalmani, G.; Rega, N.; Petersson, G. A.; Nakatsuji, H.; Hada, M.; Ehara, M.; Toyota, K.; Fukuda, R.; Hasegawa, J.; Ishida, M.; Nakajima, T.; Honda, Y.; Kitao, O.; Nakai, H.; Klene, M.; Li, X.; Knox, J. E.; Hratchian, H. P.; Cross, J. B.; Bakken, V.; Adamo, C.; Jaramillo, J.; Gomperts, R.; Stratmann, R. E.; Yazyev, O.; Austin, A. J.; Cammi, R.; Pomelli, C.; Ochterski, J. W.; Ayala, P. Y.; Morokuma, K.; Voth, G. A.; Salvador, P.; Dannenberg, J. J.; Zakrzewski, V. G.; Dapprich, S.; Daniels, A. D.; Strain, M. C.; Farkas, O.; Malick, D. K.; Rabuck, A. D.; Raghavachari, K.; Foresman, J. B.; Ortiz, J. V.; Cui, Q.; Baboul, A. G.; Clifford, S.; Cioslowski, J.; Stefanov, B. B.; Liu, G.; Liashenko, A.; Piskorz, P.; Komaromi, I.; Martin, R. L.; Fox, D. J.; Keith, T.; Al-Laham, M. A.; Peng, C. Y.; Nanayakkara, A.; Challacombe, M.; Gill, P. M. W.; Johnson, B.; Chen, W.; Wong, M. W.; Gonzalez, C.; Pople, J. A., Gaussian, Inc., Wallingford CT, 2004.
- <sup>2</sup> CYLview, version 1.0b, Legault, C. Y., UCLA, 2007.
- <sup>3</sup> (a) Barone, V.; Cossi, M. *J. Phys. Chem. A* **1998**, *102*, 1995. (b) Cossi, M.; Rega, N.; Scalmani, G.; Barone, V. *J. Comp. Chem.* **2003**, *24*, 669.
